# Supplementary material for: Proteomic approach for understanding milder neurotoxicity of Carfilzomib against Bortezomib
Source: PubMed Central journal article supplement (PMC6218500; doi:10.1038/s41598-018-34507-3), 2018-11-05

# **Proteomic approach for understanding milder neurotoxicity of Carfilzomib against Bortezomib**

**Betul Karademir<sup>1,\*,&</sup>, Gulce Sari<sup>1,7,&</sup>, Ayse Tarbin Jannuzzi<sup>2</sup>, Sravani  
Musunuri<sup>3</sup>, Grzegorz Wicher<sup>4</sup>, Tilman Grune<sup>5</sup>, Jia Mi<sup>3,8</sup>, Husniye  
Hacioglu-Bay<sup>6</sup>, Karin Forsberg-Nilsson<sup>4</sup>, Jonas Bergquist<sup>3</sup> and Tobias  
Jung<sup>5</sup>**

## SUPPLEMENTARY TABLES

**Supplementary Table 1:** List of proteins detected only in CONT group and absent in BTZ and in CFZ groups following 24 h of treatment.

| Protein IDs | Protein Names                                                                                                                                                                      |
|-------------|------------------------------------------------------------------------------------------------------------------------------------------------------------------------------------|
| A0A087WP83  | Vigilin                                                                                                                                                                            |
| A0A087WR38  | NADH dehydrogenase [ubiquinone] 1 alpha subcomplex subunit 10, mitochondrial                                                                                                       |
| A2A599      | V-type proton ATPase 116 kDa subunit a isoform 1                                                                                                                                   |
| A2A9X5      | 5(3)-deoxyribonucleotidase, cytosolic type                                                                                                                                         |
| A2AAW9      | Eukaryotic translation initiation factor 2 subunit 3, Y-linked;Eukaryotic translation initiation factor 2 subunit 3, X-linked                                                      |
| A2AER9      | Polyglutamine-binding protein 1                                                                                                                                                    |
| A2AFS1      | Serine--tRNA ligase, cytoplasmic                                                                                                                                                   |
| A2AFW6      | Mitochondrial carrier homolog 2                                                                                                                                                    |
| A2AL12      | Heterogeneous nuclear ribonucleoprotein A3                                                                                                                                         |
| A2AL83      | Aspartyl/asparaginyl beta-hydroxylase                                                                                                                                              |
| A2ALV7      | Proteasome-associated protein ECM29 homolog                                                                                                                                        |
| A2AM65      | Heterochromatin protein 1-binding protein 3                                                                                                                                        |
| A2AMY5      | Ubiquitin-associated protein 2                                                                                                                                                     |
| A2ATP5      | Myelin expression factor 2                                                                                                                                                         |
| A2AUR7      | Ras suppressor protein 1                                                                                                                                                           |
| A2AV19      | Exosome complex component RRP4                                                                                                                                                     |
| A2BGI8      | Peptidyl-prolyl cis-trans isomerase                                                                                                                                                |
| A2CES4      | U2 small nuclear ribonucleoprotein B                                                                                                                                               |
| B1ARW4      | NADH dehydrogenase [ubiquinone] iron-sulfur protein 5;NADH dehydrogenase [ubiquinone] iron-sulfur protein 5, N-terminally processed                                                |
| B2RY56      | RNA-binding protein 25                                                                                                                                                             |
| D3YTN3      | Methylsterol monooxygenase 1                                                                                                                                                       |
| D3YV43      | 40S ribosomal protein S3                                                                                                                                                           |
| D3YVC1      | 40S ribosomal protein S2                                                                                                                                                           |
| D3YVH4      | Splicing factor 1                                                                                                                                                                  |
| D3YWT1      | Heterogeneous nuclear ribonucleoprotein H3                                                                                                                                         |
| D3YXK2      | Scaffold attachment factor B1                                                                                                                                                      |
| D3YZ19      | DNA-directed RNA polymerase II subunit RPB11                                                                                                                                       |
| D3Z0T5      | Protein canopy homolog 4                                                                                                                                                           |
| D3Z1H8      | Glycolipid transfer protein                                                                                                                                                        |
| D3Z1U9      | NADH dehydrogenase [ubiquinone] flavoprotein 1, mitochondrial                                                                                                                      |
| D6RCG1      | Trifunctional purine biosynthetic protein adenosine-3;Phosphoribosylamine--glycine ligase;Phosphoribosylformylglycinamide cyclo-ligase;Phosphoribosylglycinamide formyltransferase |
| D6RGA5      | Pre-mRNA-splicing factor SPF27                                                                                                                                                     |
| D6RJ77      | Peptidyl-prolyl cis-trans isomerase-like 4                                                                                                                                         |
| D9J2V6      | Pre-B-cell leukemia transcription factor 1                                                                                                                                         |
| E0CXB1      | Proteasome subunit alpha type-6                                                                                                                                                    |
| E0CXW7      | Probable tRNA N6-adenosine threonylcarbamoyltransferase                                                                                                                            |
| E0CXZ0      | Nucleolar protein 56                                                                                                                                                               |
| E0CZE0      | NEDD8-activating enzyme E1 regulatory subunit                                                                                                                                      |
| E9PVP3      | Mannose-P-dolichol utilization defect 1 protein                                                                                                                                    |
| E9PWA7      | Actin-related protein 2/3 complex subunit 4                                                                                                                                        |
| E9PXX7      | Thioredoxin domain-containing protein 5                                                                                                                                            |
| E9Q055      | Glyoxalase domain-containing protein 4                                                                                                                                             |
| E9Q1J7      | Propionyl-CoA carboxylase beta chain, mitochondrial                                                                                                                                |
| E9Q2H8      | Hydroxyacylglutathione hydrolase, mitochondrial                                                                                                                                    |

|          |                                                                                                             |
|----------|-------------------------------------------------------------------------------------------------------------|
| E9Q2Z4   | Non-histone chromosomal protein HMG-17                                                                      |
| E9Q3T7   | Adenylosuccinate lyase                                                                                      |
| E9Q3V6   | Septin-2                                                                                                    |
| E9Q5I9   | 26S proteasome non-ATPase regulatory subunit 13                                                             |
| E9Q6F4   | Puromycin-sensitive aminopeptidase                                                                          |
| E9Q6Z0   | Cullin-5                                                                                                    |
| E9Q7L0   | 2-oxoglutarate dehydrogenase, mitochondrial                                                                 |
| E9QAK5   | Kinesin heavy chain isoform 5C;Kinesin-1 heavy chain;Kinesin heavy chain isoform 5A                         |
| F6QA74   | DNA-(apurinic or apyrimidinic site) lyase;DNA-(apurinic or apyrimidinic site) lyase, mitochondrial          |
| F6U775   | Dynamin-like 120 kDa protein, mitochondrial;Dynamin-like 120 kDa protein, form S1                           |
| F6USD5   | Mesencephalic astrocyte-derived neurotrophic factor                                                         |
| F6VF36   | Signal recognition particle receptor subunit alpha                                                          |
| F6VVY4   | Tricarboxylate transport protein, mitochondrial                                                             |
| F6XIG5   | Coatomer subunit epsilon                                                                                    |
| F6ZFT1   | Acyl carrier protein;Acyl carrier protein, mitochondrial                                                    |
| F7ALS6   | Aspartate aminotransferase, cytoplasmic                                                                     |
| G3UXJ6   | Heterogeneous nuclear ribonucleoprotein Q                                                                   |
| G3UYD0   | General transcription factor II-I                                                                           |
| G3UZJ5   | Casein kinase II subunit beta                                                                               |
| G3UZL6   | SUMO-conjugating enzyme UBC9                                                                                |
| G5E8G0   | Heterogeneous nuclear ribonucleoprotein D, isoform CRA_b                                                    |
| G5E9I9   | NEDD8-conjugating enzyme Ubc12                                                                              |
| H3BJD4   | Disks large-associated protein 4                                                                            |
| H3BJP2   | S-formylglutathione hydrolase                                                                               |
| H3BKW0   | Cleavage and polyadenylation specificity factor subunit 6                                                   |
| H3BL56   | Rho-related GTP-binding protein RhoC                                                                        |
| H7BWX9   | Small ubiquitin-related modifier 2                                                                          |
| H7BWZ3   | Actin-related protein 2/3 complex subunit 3                                                                 |
| M0QWF0   | Zinc finger protein 207                                                                                     |
| M0QWX0   | Methionine aminopeptidase;Methionine aminopeptidase 2                                                       |
| O35344   | Importin subunit alpha-4                                                                                    |
| O35465   | Peptidyl-prolyl cis-trans isomerase FKBP8                                                                   |
| O35685   | Nuclear migration protein nudC                                                                              |
| O35737   | Heterogeneous nuclear ribonucleoprotein H;Heterogeneous nuclear ribonucleoprotein H, N-terminally processed |
| O35841   | Apoptosis inhibitor 5                                                                                       |
| O54984   | ATPase Asn1                                                                                                 |
| O55135   | Eukaryotic translation initiation factor 6                                                                  |
| O55143-2 | Sarcoplasmic/endoplasmic reticulum calcium ATPase 2                                                         |
| O70274   | Protein tyrosine phosphatase type IVA 2                                                                     |
| O88696   | Putative ATP-dependent Clp protease proteolytic subunit, mitochondrial                                      |
| P02802   | Metallothionein-1                                                                                           |
| P08226   | Apolipoprotein E                                                                                            |
| P10649   | Glutathione S-transferase Mu 1                                                                              |
| P12970   | 60S ribosomal protein L7a                                                                                   |
| P14115   | 60S ribosomal protein L27a                                                                                  |
| P14131   | 40S ribosomal protein S16                                                                                   |
| P15105   | Glutamine synthetase                                                                                        |
| P20108   | Thioredoxin-dependent peroxide reductase, mitochondrial                                                     |
| P21956-2 | Lactadherin                                                                                                 |
| P23780   | Beta-galactosidase                                                                                          |
| P24668   | Cation-dependent mannose-6-phosphate receptor                                                               |
| P25206   | DNA replication licensing factor MCM3                                                                       |
| P27641   | X-ray repair cross-complementing protein 5                                                                  |
| P27661   | Histone H2A.x                                                                                               |

|          |                                                                                                                                                                                                   |
|----------|---------------------------------------------------------------------------------------------------------------------------------------------------------------------------------------------------|
| P28474   | Alcohol dehydrogenase class-3                                                                                                                                                                     |
| P28659-2 | CUGBP Elav-like family member 1                                                                                                                                                                   |
| P28667   | MARCKS-related protein                                                                                                                                                                            |
| P31324   | cAMP-dependent protein kinase type II-beta regulatory subunit;cAMP-dependent protein kinase type II-alpha regulatory subunit                                                                      |
| P32067   | Lupus La protein homolog                                                                                                                                                                          |
| P35762   | CD81 antigen                                                                                                                                                                                      |
| P37040   | NADPH--cytochrome P450 reductase                                                                                                                                                                  |
| P41105   | 60S ribosomal protein L28                                                                                                                                                                         |
| P42669   | Transcriptional activator protein Pur-alpha                                                                                                                                                       |
| P43277   | Histone H1.3; Histone H1.4; Histone H1.5                                                                                                                                                          |
| P45376   | Aldose reductase                                                                                                                                                                                  |
| P45878   | Peptidyl-prolyl cis-trans isomerase FKBP2                                                                                                                                                         |
| P46061   | Ran GTPase-activating protein 1                                                                                                                                                                   |
| P46978   | Dolichyl-diphosphooligosaccharide--protein glycosyltransferase subunit STT3A                                                                                                                      |
| P47856-2 | Glutamine--fructose-6-phosphate aminotransferase [isomerizing] 1;Glutamine--fructose-6-phosphate aminotransferase [isomerizing] 2                                                                 |
| P47941   | Crk-like protein                                                                                                                                                                                  |
| P47962   | 60S ribosomal protein L5                                                                                                                                                                          |
| P48771   | Cytochrome c oxidase subunit 7A2, mitochondrial                                                                                                                                                   |
| P49722   | Proteasome subunit alpha type-2                                                                                                                                                                   |
| P50543   | Protein S100-A11                                                                                                                                                                                  |
| P50580   | Proliferation-associated protein 2G4                                                                                                                                                              |
| P51807   | Dynein light chain Tctex-type 1                                                                                                                                                                   |
| P51881   | ADP/ATP translocase 2;ADP/ATP translocase 2, N-terminally processed                                                                                                                               |
| P53986   | Monocarboxylate transporter 1                                                                                                                                                                     |
| P54775   | 26S protease regulatory subunit 6B                                                                                                                                                                |
| P54823   | Probable ATP-dependent RNA helicase DDX6                                                                                                                                                          |
| P56183-2 | Ribosomal RNA processing protein 1 homolog A                                                                                                                                                      |
| P56812   | Programmed cell death protein 5                                                                                                                                                                   |
| P57759   | Endoplasmic reticulum resident protein 29                                                                                                                                                         |
| P57780   | Alpha-actinin-4; Alpha-actinin-1                                                                                                                                                                  |
| P58044   | Isopentenyl-diphosphate Delta-isomerase 1                                                                                                                                                         |
| P60843   | Eukaryotic initiation factor 4A-I                                                                                                                                                                 |
| P61087   | Ubiquitin-conjugating enzyme E2 K                                                                                                                                                                 |
| P61971   | Nuclear transport factor 2                                                                                                                                                                        |
| P62141   | Serine/threonine-protein phosphatase PP1-beta catalytic subunit;Serine/threonine-protein phosphatase PP1-gamma catalytic subunit;Serine/threonine-protein phosphatase PP1-alpha catalytic subunit |
| P62267   | 40S ribosomal protein S23                                                                                                                                                                         |
| P62301   | 40S ribosomal protein S13                                                                                                                                                                         |
| P62334   | 26S protease regulatory subunit 10B                                                                                                                                                               |
| P62717   | 60S ribosomal protein L18a                                                                                                                                                                        |
| P62814   | V-type proton ATPase subunit B, brain isoform                                                                                                                                                     |
| P62827   | GTP-binding nuclear protein Ran;GTP-binding nuclear protein Ran, testis-specific isoform                                                                                                          |
| P63328-2 | Serine/threonine-protein phosphatase 2B catalytic subunit alpha isoform                                                                                                                           |
| P84104-2 | Serine/arginine-rich splicing factor 3                                                                                                                                                            |
| P97447   | Four and a half LIM domains protein 1                                                                                                                                                             |
| P97822-2 | Acidic leucine-rich nuclear phosphoprotein 32 family member E                                                                                                                                     |
| Q00PI9   | Heterogeneous nuclear ribonucleoprotein U-like protein 2                                                                                                                                          |
| Q02819   | Nucleobindin-1                                                                                                                                                                                    |
| Q05186   | Reticulocalbin-1                                                                                                                                                                                  |
| Q05816   | Fatty acid-binding protein, epidermal                                                                                                                                                             |
| Q05D44   | Eukaryotic translation initiation factor 5B                                                                                                                                                       |
| Q06335-2 | Amyloid-like protein 2                                                                                                                                                                            |
| Q3THS6   | S-adenosylmethionine synthase isoform type-2                                                                                                                                                      |
| Q3THW5   | Histone H2A.V; Histone H2A. Z; Histone H2A                                                                                                                                                        |

|          |                                                                                                                                       |
|----------|---------------------------------------------------------------------------------------------------------------------------------------|
| Q3TIX9   | U4/U6.U5 tri-snRNP-associated protein 2                                                                                               |
| Q3TLQ0   | Microtubule-associated protein                                                                                                        |
| Q3TUE1   | Far upstream element-binding protein 1                                                                                                |
| Q3U0V1   | Far upstream element-binding protein 2                                                                                                |
| Q3U1J4   | DNA damage-binding protein 1                                                                                                          |
| Q3UJB0   | Splicing factor 3b, subunit 2                                                                                                         |
| Q3UKJ7-2 | WD40 repeat-containing protein SMU1                                                                                                   |
| Q3ULG5   | DNA replication licensing factor MCM6                                                                                                 |
| Q3V3R1   | Monofunctional C1-tetrahydrofolate synthase, mitochondrial                                                                            |
| Q501J6-2 | Probable ATP-dependent RNA helicase DDX17                                                                                             |
| Q52KR6   | Apoptotic chromatin condensation inducer in the nucleus                                                                               |
| Q5SSW2-2 | Proteasome activator complex subunit 4                                                                                                |
| Q5SUR0   | Phosphoribosylformylglycinamide synthase                                                                                              |
| Q60631-2 | Growth factor receptor-bound protein 2                                                                                                |
| Q60692   | Proteasome subunit beta type-6                                                                                                        |
| Q60715-2 | Prolyl 4-hydroxylase subunit alpha-1                                                                                                  |
| Q60817   | Nascent polypeptide-associated complex subunit alpha;Nascent polypeptide-associated complex subunit alpha, muscle-specific form       |
| Q60870   | Receptor expression-enhancing protein 5                                                                                               |
| Q60967   | Bifunctional 3-phosphoadenosine 5-phosphosulfate synthase 1;Sulfate adenylyltransferase;Adenylyl-sulfate kinase                       |
| Q61035   | Histidine--tRNA ligase, cytoplasmic                                                                                                   |
| Q61036-2 | Serine/threonine-protein kinase PAK 3;Serine/threonine-protein kinase PAK 2;PAK-2p27; PAK-2p34; Serine/threonine-protein kinase PAK 1 |
| Q61074   | Protein phosphatase 1G                                                                                                                |
| Q61164   | Transcriptional repressor CTCF                                                                                                        |
| Q61166   | Microtubule-associated protein RP/EB family member 1                                                                                  |
| Q61249   | Immunoglobulin-binding protein 1;Immunoglobulin-binding protein 1b                                                                    |
| Q61335   | B-cell receptor-associated protein 31                                                                                                 |
| Q61656   | Probable ATP-dependent RNA helicase DDX5                                                                                              |
| Q61686   | Chromobox protein homolog 5                                                                                                           |
| Q62241   | U1 small nuclear ribonucleoprotein C                                                                                                  |
| Q62261-2 | Spectrin beta chain, non-erythrocytic 1                                                                                               |
| Q62418-3 | Drebrin-like protein                                                                                                                  |
| Q62425   | NADH dehydrogenase [ubiquinone] 1 alpha subcomplex subunit 4                                                                          |
| Q64445   | Cytochrome c oxidase subunit 8A, mitochondrial                                                                                        |
| Q68FL6   | Methionine--tRNA ligase, cytoplasmic                                                                                                  |
| Q6A4J8-3 | Ubiquitin carboxyl-terminal hydrolase 7;Ubiquitin carboxyl-terminal hydrolase                                                         |
| Q6P1B1   | Xaa-Pro aminopeptidase 1                                                                                                              |
| Q6P5F9   | Exportin-1                                                                                                                            |
| Q6PBC0   | Phosphatidate cytidylyltransferase 2                                                                                                  |
| Q6TEK5   | Vitamin K epoxide reductase complex subunit 1-like protein 1                                                                          |
| Q6ZWY8   | Thymosin beta-10                                                                                                                      |
| Q71LX4   | Talin-2                                                                                                                               |
| Q7TMR0   | Lysosomal Pro-X carboxypeptidase                                                                                                      |
| Q7TPM0   | Chromobox protein homolog 1                                                                                                           |
| Q7TT37   | Elongator complex protein 1                                                                                                           |
| Q80SZ7   | Guanine nucleotide-binding protein G(I)/G(S)/G(O) subunit gamma-5                                                                     |
| Q80VD1   | Protein FAM98B                                                                                                                        |
| Q80W54   | CAAX prenyl protease 1 homolog                                                                                                        |
| Q80X50-2 | Ubiquitin-associated protein 2-like                                                                                                   |
| Q80ZM5   | H1 histone family, member X                                                                                                           |
| Q8BFR4   | N-acetylglucosamine-6-sulfatase                                                                                                       |
| Q8BFZ3   | Beta-actin-like protein 2                                                                                                             |
| Q8BG30   | Negative elongation factor A                                                                                                          |
| Q8BGB7   | Enolase-phosphatase E1                                                                                                                |
| Q8BGC4   | Zinc-binding alcohol dehydrogenase domain-containing protein 2                                                                        |
| Q8BHC9   | Alpha-(1,3)-fucosyltransferase 11                                                                                                     |

|          |                                                                                                                                                                                                                                 |
|----------|---------------------------------------------------------------------------------------------------------------------------------------------------------------------------------------------------------------------------------|
| Q8BHZ0   | Protein FAM49A                                                                                                                                                                                                                  |
| Q8BJ71   | Nuclear pore complex protein Nup93                                                                                                                                                                                              |
| Q8BMJ3   | Eukaryotic translation initiation factor 1A, X-chromosomal;Eukaryotic translation initiation factor 1A                                                                                                                          |
| Q8BTU6   | Eukaryotic initiation factor 4A-II                                                                                                                                                                                              |
| Q8BWF0   | Succinate-semialdehyde dehydrogenase, mitochondrial                                                                                                                                                                             |
| Q8BWY3   | Eukaryotic peptide chain release factor subunit 1                                                                                                                                                                               |
| Q8BXA1   | Golgi integral membrane protein 4                                                                                                                                                                                               |
| Q8BZN7   | Thyroid hormone receptor-associated protein 3                                                                                                                                                                                   |
| Q8C1B7-3 | Septin-11                                                                                                                                                                                                                       |
| Q8C7K6   | Prenylcysteine oxidase-like                                                                                                                                                                                                     |
| Q8C878-2 | NEDD8-activating enzyme E1 catalytic subunit                                                                                                                                                                                    |
| Q8CDN6   | Thioredoxin-like protein 1                                                                                                                                                                                                      |
| Q8CGK3   | Lon protease homolog, mitochondrial                                                                                                                                                                                             |
| Q8K1K2   | 26S protease regulatory subunit 8                                                                                                                                                                                               |
| Q8K2T1-2 | NmrA-like family domain-containing protein 1                                                                                                                                                                                    |
| Q8K310   | Matrin-3                                                                                                                                                                                                                        |
| Q8K3J1   | NADH dehydrogenase [ubiquinone] iron-sulfur protein 8, mitochondrial                                                                                                                                                            |
| Q8K4F5   | Alpha/beta hydrolase domain-containing protein 11                                                                                                                                                                               |
| Q8QZY9   | Splicing factor 3B subunit 4                                                                                                                                                                                                    |
| Q8R0F6   | Integrin-linked kinase-associated serine/threonine phosphatase 2C                                                                                                                                                               |
| Q8R0H9   | ADP-ribosylation factor-binding protein GGA1                                                                                                                                                                                    |
| Q8R0Y6   | Cytosolic 10-formyltetrahydrofolate dehydrogenase                                                                                                                                                                               |
| Q8R127   | Saccharopine dehydrogenase-like oxidoreductase                                                                                                                                                                                  |
| Q8R180   | ERO1-like protein alpha                                                                                                                                                                                                         |
| Q8VDM6-2 | Heterogeneous nuclear ribonucleoprotein U-like protein 1                                                                                                                                                                        |
| Q8VE97   | Serine/arginine-rich splicing factor 4                                                                                                                                                                                          |
| Q8VH51-3 | RNA-binding protein 39                                                                                                                                                                                                          |
| Q8VHM5   | Heterogeneous nuclear ribonucleoprotein R                                                                                                                                                                                       |
| Q8VIM9   | Immunity-related GTPase family Q protein                                                                                                                                                                                        |
| Q91WQ3   | Tyrosine--tRNA ligase, cytoplasmic;Tyrosine--tRNA ligase, cytoplasmic, N-terminally processed                                                                                                                                   |
| Q91YM2   | Rho GTPase-activating protein 35                                                                                                                                                                                                |
| Q91YQ5   | Dolichyl-diphosphooligosaccharide--protein glycosyltransferase subunit 1                                                                                                                                                        |
| Q91YZ2   | C-terminal-binding protein 2                                                                                                                                                                                                    |
| Q91Z67   | SLIT-ROBO Rho GTPase-activating protein 2                                                                                                                                                                                       |
| Q921L3   | Transmembrane and coiled-coil domain-containing protein 1                                                                                                                                                                       |
| Q922D8   | C-1-tetrahydrofolate synthase, cytoplasmic;Methylenetetrahydrofolate dehydrogenase;Methenyltetrahydrofolate cyclohydrolase;Formyltetrahydrofolate synthetase;C-1-tetrahydrofolate synthase, cytoplasmic, N-terminally processed |
| Q922Q8   | Leucine-rich repeat-containing protein 59                                                                                                                                                                                       |
| Q922Y1   | UBX domain-containing protein 1                                                                                                                                                                                                 |
| Q99JF5   | Diphosphomevalonate decarboxylase                                                                                                                                                                                               |
| Q99JI4   | 26S proteasome non-ATPase regulatory subunit 6                                                                                                                                                                                  |
| Q99JY8   | Lipid phosphate phosphohydrolase 3                                                                                                                                                                                              |
| Q99KF1   | Transmembrane emp24 domain-containing protein 9                                                                                                                                                                                 |
| Q99L27   | GMP reductase 2                                                                                                                                                                                                                 |
| Q99L45   | Eukaryotic translation initiation factor 2 subunit 2                                                                                                                                                                            |
| Q99LC5   | Electron transfer flavoprotein subunit alpha, mitochondrial                                                                                                                                                                     |
| Q99LF4   | tRNA-splicing ligase RtcB homolog                                                                                                                                                                                               |
| Q99LI7   | Cleavage stimulation factor subunit 3                                                                                                                                                                                           |
| Q99LP6   | GrpE protein homolog 1, mitochondrial                                                                                                                                                                                           |
| Q99M87-3 | DnaJ homolog subfamily A member 3, mitochondrial                                                                                                                                                                                |
| Q99MN1   | Lysine--tRNA ligase                                                                                                                                                                                                             |
| Q99MR6-3 | Serrate RNA effector molecule homolog                                                                                                                                                                                           |
| Q99NB1   | Acetyl-coenzyme A synthetase 2-like, mitochondrial                                                                                                                                                                              |
| Q99P72-3 | Reticulon-4                                                                                                                                                                                                                     |
| Q99PT1   | Rho GDP-dissociation inhibitor 1                                                                                                                                                                                                |

|          |                                                                                                                               |
|----------|-------------------------------------------------------------------------------------------------------------------------------|
| Q9CPU0   | Lactoylglutathione lyase                                                                                                      |
| Q9CQ65   | S-methyl-5-thioadenosine phosphorylase                                                                                        |
| Q9CQC6   | Basic leucine zipper and W2 domain-containing protein 1                                                                       |
| Q9CQC9   | GTP-binding protein SAR1b                                                                                                     |
| Q9CQE8   | UPF0568 protein C14orf166 homolog                                                                                             |
| Q9CQF3   | Cleavage and polyadenylation specificity factor subunit 5                                                                     |
| Q9CQH7   | Transcription factor BTF3 homolog 4                                                                                           |
| Q9CQK7   | RWD domain-containing protein 1                                                                                               |
| Q9CQL7   | MORF4 family-associated protein 1                                                                                             |
| Q9CQM2   | ER lumen protein retaining receptor 2                                                                                         |
| Q9CQN1   | Heat shock protein 75 kDa, mitochondrial                                                                                      |
| Q9CQR6   | Serine/threonine-protein phosphatase 6 catalytic subunit                                                                      |
| Q9CQT1   | Methylthioribose-1-phosphate isomerase                                                                                        |
| Q9CQZ1   | Heat shock factor-binding protein 1                                                                                           |
| Q9CR20   | Immediate early response 3-interacting protein 1                                                                              |
| Q9CR51   | V-type proton ATPase subunit G 1                                                                                              |
| Q9CT10   | Ran-binding protein 3                                                                                                         |
| Q9CWJ9   | Bifunctional purine biosynthesis protein PURH;Phosphoribosylaminoimidazolecarboxamide formyltransferase;IMP cyclohydrolase    |
| Q9CWZ3-2 | RNA-binding protein 8A                                                                                                        |
| Q9CXS4   | Centromere protein V                                                                                                          |
| Q9CXU9   | Eukaryotic translation initiation factor 1b                                                                                   |
| Q9CZY3-2 | Ubiquitin-conjugating enzyme E2 variant 1                                                                                     |
| Q9D0T1   | NHP2-like protein 1;NHP2-like protein 1, N-terminally processed                                                               |
| Q9D173   | Mitochondrial import receptor subunit TOM7 homolog                                                                            |
| Q9D6V8   | Polyadenylate-binding protein-interacting protein 2                                                                           |
| Q9D7A8   | Armadillo repeat-containing protein 1                                                                                         |
| Q9D883   | Splicing factor U2AF 35 kDa subunit                                                                                           |
| Q9D892   | Inosine triphosphate pyrophosphatase                                                                                          |
| Q9D8B3   | Charged multivesicular body protein 4b                                                                                        |
| Q9D964   | Glycine amidinotransferase, mitochondrial                                                                                     |
| Q9DAK9   | 14 kDa phosphohistidine phosphatase                                                                                           |
| Q9DAR7   | m7GpppX diphosphatase                                                                                                         |
| Q9DAW9   | Calponin-3                                                                                                                    |
| Q9DBE0   | Cysteine sulfinic acid decarboxylase                                                                                          |
| Q9DBH5   | Vesicular integral-membrane protein VIP36                                                                                     |
| Q9DBR1-2 | 5-3 exoribonuclease 2                                                                                                         |
| Q9DC70   | NADH dehydrogenase [ubiquinone] iron-sulfur protein 7, mitochondrial                                                          |
| Q9DCD0   | 6-phosphogluconate dehydrogenase, decarboxylating                                                                             |
| Q9DCN2-2 | NADH-cytochrome b5 reductase 3;NADH-cytochrome b5 reductase 3 membrane-bound form;NADH-cytochrome b5 reductase 3 soluble form |
| Q9EP69   | Phosphatidylinositol phosphatase SAC1                                                                                         |
| Q9EQH3   | Vacuolar protein sorting-associated protein 35                                                                                |
| Q9ERT9   | Protein phosphatase 1 regulatory subunit 1A                                                                                   |
| Q9EST5   | Acidic leucine-rich nuclear phosphoprotein 32 family member B                                                                 |
| Q9ESW8   | Pyroglutamyl-peptidase 1                                                                                                      |
| Q9ET30   | Transmembrane 9 superfamily member 3                                                                                          |
| Q9JHI5   | Isovaleryl-CoA dehydrogenase, mitochondrial                                                                                   |
| Q9JIG8   | PRA1 family protein 2                                                                                                         |
| Q9JJ61   | Polypeptide N-acetylgalactosaminyltransferase 16                                                                              |
| Q9JJU8   | SH3 domain-binding glutamic acid-rich-like protein                                                                            |
| Q9JKC6   | Cell cycle exit and neuronal differentiation protein 1                                                                        |
| Q9JKV1   | Proteasomal ubiquitin receptor ADRM1                                                                                          |
| Q9JL35   | High mobility group nucleosome-binding domain-containing protein 5                                                            |
| Q9QUR6   | Prolyl endopeptidase                                                                                                          |
| Q9QXT0   | Protein canopy homolog 2                                                                                                      |
| Q9QYB1   | Chloride intracellular channel protein 4                                                                                      |

|          |                                                                                               |
|----------|-----------------------------------------------------------------------------------------------|
| Q9QYG0-2 | Protein NDRG2                                                                                 |
| Q9R062   | Glycogenin-1                                                                                  |
| Q9R0H0-2 | Peroxisomal acyl-coenzyme A oxidase 1                                                         |
| Q9R0N0   | Galactokinase                                                                                 |
| Q9R0P5   | Dextrin                                                                                       |
| Q9R0P9   | Ubiquitin carboxyl-terminal hydrolase isozyme L1                                              |
| Q9R0Q7   | Prostaglandin E synthase 3                                                                    |
| Q9R1P0   | Proteasome subunit alpha type-4                                                               |
| Q9R1P3   | Proteasome subunit beta type-2                                                                |
| Q9R1T2-2 | SUMO-activating enzyme subunit 1;SUMO-activating enzyme subunit 1, N-terminally processed     |
| Q9R1T4-2 | Septin-6                                                                                      |
| Q9WTX5   | S-phase kinase-associated protein 1                                                           |
| Q9WU78   | Programmed cell death 6-interacting protein                                                   |
| Q9WVF5   | Epidermal growth factor receptor                                                              |
| Q9Z0H3-2 | SWI/SNF-related matrix-associated actin-dependent regulator of chromatin subfamily B member 1 |
| Q9Z130   | Heterogeneous nuclear ribonucleoprotein D-like                                                |
| Q9Z1N5   | Spliceosome RNA helicase Ddx39b                                                               |
| Q9Z1X4   | Interleukin enhancer-binding factor 3                                                         |
| Q9Z275   | Retinaldehyde-binding protein 1                                                               |
| Q9Z2Q6   | Septin-5                                                                                      |
| S4R2G9   | Aldo-keto reductase family 1, member B10 (aldose reductase)                                   |



**Supplementary Table 2:** List of proteins detected only in BTZ group and absent in CONT and in CFZ groups following 24 h of treatment.

| <b>Protein IDs</b> | <b>Protein Names</b>                                                                                        |
|--------------------|-------------------------------------------------------------------------------------------------------------|
| A0A087WP63         | Predicted gene 42715                                                                                        |
| A2AAN2             | Signal recognition particle subunit SRP68                                                                   |
| A2AFI9             | Histone-binding protein RBBP7                                                                               |
| A2AVJ7             | Ribosome-binding protein 1                                                                                  |
| A6ZI44             | Fructose-bisphosphate aldolase;Fructose-bisphosphate aldolase A                                             |
| C0H5X4             | GTPase HRas;GTPase HRas, N-terminally processed;GTPase KRas;GTPase KRas, N-terminally processed;GTPase NRas |
| D3YV37             | Myosin, light chain 12A, regulatory, non-sarcomeric                                                         |
| D3YW48             | Calpain small subunit 1                                                                                     |
| D3Z3Y3             | Single-stranded DNA-binding protein; Single-stranded DNA-binding protein, mitochondrial                     |
| E9PVC6             | Eukaryotic translation initiation factor 4 gamma 1                                                          |
| E9Q0W5             | Protein FAM3C                                                                                               |
| E9Q5C9             | Nucleolar and coiled-body phosphoprotein 1                                                                  |
| E9QAS4             | Chromodomain-helicase-DNA-binding protein 4                                                                 |
| F6VQ81             | Tumor protein D54                                                                                           |
| F6VSK8             | Integrin alpha-6;Integrin alpha-6 heavy chain;Integrin alpha-6 light chain                                  |
| F6WZH1             | Methyl-CpG-binding domain protein 3                                                                         |
| F7C265             | Coiled-coil domain-containing protein 47                                                                    |
| O08585             | Clathrin light chain A                                                                                      |
| O35343             | Importin subunit alpha-3                                                                                    |
| O55028             | [3-methyl-2-oxobutanoate dehydrogenase [lipoamide]] kinase, mitochondrial                                   |
| O88325             | Alpha-N-acetylglucosaminidase                                                                               |
| O88441             | Metaxin-2                                                                                                   |
| P02468             | Laminin subunit gamma-1                                                                                     |
| P10637-4           | Microtubule-associated protein tau                                                                          |
| P16125             | L-lactate dehydrogenase B chain;L-lactate dehydrogenase                                                     |
| P26369             | Splicing factor U2AF 65 kDa subunit                                                                         |
| P27546-2           | Microtubule-associated protein 4;Microtubule-associated protein                                             |
| P35802             | Neuronal membrane glycoprotein M6-a                                                                         |
| P46425             | Glutathione S-transferase P 2;Glutathione S-transferase P 1                                                 |
| P52293             | Importin subunit alpha-1                                                                                    |
| P60487             | Pyridoxal phosphate phosphatase                                                                             |
| P62311             | U6 snRNA-associated Sm-like protein LSm3                                                                    |
| P63073             | Eukaryotic translation initiation factor 4E                                                                 |
| P85094             | Isochorismatase domain-containing protein 2A, mitochondrial                                                 |
| P97429             | Annexin A4; Annexin                                                                                         |
| P97478             | Ubiquinone biosynthesis protein COQ7 homolog                                                                |
| P99029-2           | Peroxiredoxin-5, mitochondrial                                                                              |
| Q60875-5           | Rho guanine nucleotide exchange factor 2                                                                    |
| Q61879             | Myosin-10                                                                                                   |
| Q62186             | Translocon-associated protein subunit delta                                                                 |
| Q62376-2           | U1 small nuclear ribonucleoprotein 70 kDa                                                                   |
| Q63810-2           | Calcineurin subunit B type 1                                                                                |
| Q64152-2           | Transcription factor BTF3                                                                                   |
| Q68FL0             | Sodium/calcium exchanger 1                                                                                  |
| Q6A028             | Switch-associated protein 70                                                                                |
| Q6IRU2             | Tropomyosin alpha-4 chain                                                                                   |
| Q6P5F7-2           | Protein tweety homolog 3                                                                                    |
| Q6PD26             | GPI transamidase component PIG-S                                                                            |
| Q6PIC6             | Sodium/potassium-transporting ATPase subunit alpha-3                                                        |
| Q78ZA7             | Nucleosome assembly protein 1-like 4                                                                        |

|          |                                                                                     |
|----------|-------------------------------------------------------------------------------------|
| Q80V26   | Inositol monophosphatase 3                                                          |
| Q80YX1-5 | Tenascin                                                                            |
| Q8BNY6   | Neuronal calcium sensor 1                                                           |
| Q8BP27-2 | Swi5-dependent recombination DNA repair protein 1 homolog                           |
| Q8BT60   | Copine-3                                                                            |
| Q8BUN5   | Mothers against decapentaplegic homolog 3;Mothers against decapentaplegic homolog 2 |
| Q8C129   | Leucyl-cystinyl aminopeptidase                                                      |
| Q8C3Y4   | Kinetochore-associated protein 1                                                    |
| Q8C7X2-2 | ER membrane protein complex subunit 1                                               |
| Q8JZK9   | Hydroxymethylglutaryl-CoA synthase, cytoplasmic                                     |
| Q8K1M6-5 | Dynamin-1-like protein                                                              |
| Q8R1N4-3 | NudC domain-containing protein 3                                                    |
| Q8R317   | Ubiquilin-1                                                                         |
| Q8VBV7   | COP9 signalosome complex subunit 8                                                  |
| Q91WT9-2 | Cystathionine beta-synthase                                                         |
| Q923D4   | Splicing factor 3B subunit 5                                                        |
| Q99KI3   | ER membrane protein complex subunit 3                                               |
| Q99KV1   | DnaJ homolog subfamily B member 11                                                  |
| Q99LB2   | Dehydrogenase/reductase SDR family member 4                                         |
| Q9CQN3   | Mitochondrial import receptor subunit TOM6 homolog                                  |
| Q9CQU0   | Thioredoxin domain-containing protein 12                                            |
| Q9CXZ1   | NADH dehydrogenase [ubiquinone] iron-sulfur protein 4, mitochondrial                |
| Q9CZW5   | Mitochondrial import receptor subunit TOM70                                         |
| Q9D6F9   | Tubulin beta-4A chain                                                               |
| Q9D6J6-2 | NADH dehydrogenase [ubiquinone] flavoprotein 2, mitochondrial                       |
| Q9D7M1   | Glucose-induced degradation protein 8 homolog                                       |
| Q9ER72-2 | Cysteine--tRNA ligase, cytoplasmic                                                  |
| Q9ERY9   | Probable ergosterol biosynthetic protein 28                                         |
| Q9JIQ3   | Diablo homolog, mitochondrial                                                       |
| Q9JKR6   | Hypoxia up-regulated protein 1                                                      |
| Q9JKW0   | ADP-ribosylation factor-like protein 6-interacting protein 1                        |
| Q9QUH0   | Glutaredoxin-1                                                                      |
| Q9QXS6-2 | Drebrin                                                                             |
| Q9QYC0-2 | Alpha-adducin                                                                       |
| Q9R0A0   | Peroxisomal membrane protein PEX14                                                  |
| Q9WTM5   | RuvB-like 2                                                                         |
| Q9WTR5   | Cadherin-13                                                                         |
| Q9WV55   | Vesicle-associated membrane protein-associated protein A                            |
| Q9Z0H4-3 | CUGBP Elav-like family member 2                                                     |
| Q9Z0Y1   | Dynactin subunit 3                                                                  |
| Q9Z1Z2   | Serine-threonine kinase receptor-associated protein                                 |
| Q9Z2G6-2 | Protein sel-1 homolog 1                                                             |

**Supplementary Table 3:** List of proteins detected only in CFZ group and absent in CONT and in BTZ groups following 24 h of treatment.

| <b>Protein IDs</b> | <b>Protein Names</b>                                                                                                                           |
|--------------------|------------------------------------------------------------------------------------------------------------------------------------------------|
| A0A087WQ34         | Mortality factor 4-like protein 1                                                                                                              |
| A0A087WQR6         | Tripeptidyl-peptidase 2                                                                                                                        |
| A2AE03             | Eukaryotic translation initiation factor 3 subunit I                                                                                           |
| A2AIW9             | Mitochondrial-processing peptidase subunit alpha                                                                                               |
| B2RXS4             | Plexin-B2                                                                                                                                      |
| D3YU80             | Cold-inducible RNA-binding protein                                                                                                             |
| D3YZ18             | High mobility group protein B1                                                                                                                 |
| E9PV44             | ATPase inhibitor, mitochondrial                                                                                                                |
| E9Q3G4             | Sterile alpha motif domain-containing protein 3                                                                                                |
| E9Q7G1             | Transmembrane p24-trafficking protein 7                                                                                                        |
| F6RJ83             | NADH dehydrogenase [ubiquinone] iron-sulfur protein 2, mitochondrial                                                                           |
| F6YUH3             | Branched-chain-amino-acid aminotransferase, cytosolic;Branched-chain-amino-acid aminotransferase                                               |
| O70310             | Glycylpeptide N-tetradecanoyltransferase 1                                                                                                     |
| P12815-2           | Programmed cell death protein 6                                                                                                                |
| P42125             | Enoyl-CoA delta isomerase 1, mitochondrial                                                                                                     |
| P47963             | 60S ribosomal protein L13                                                                                                                      |
| P52503             | NADH dehydrogenase [ubiquinone] iron-sulfur protein 6, mitochondrial                                                                           |
| P62869             | Transcription elongation factor B polypeptide 2                                                                                                |
| P62900             | 60S ribosomal protein L31                                                                                                                      |
| P62960             | Nuclease-sensitive element-binding protein 1                                                                                                   |
| P63001             | Ras-related C3 botulinum toxin substrate 1;Ras-related C3 botulinum toxin substrate 3;Ras-related C3 botulinum toxin substrate 2               |
| P63330             | Serine/threonine-protein phosphatase 2A catalytic subunit alpha isoform;Serine/threonine-protein phosphatase 2A catalytic subunit beta isoform |
| P97315             | Cysteine and glycine-rich protein 1                                                                                                            |
| Q02780-2           | Nuclear factor 1 A-type                                                                                                                        |
| Q3TDD9             | Protein phosphatase 1 regulatory subunit 21                                                                                                    |
| Q3UW83             | 40S ribosomal protein S10                                                                                                                      |
| Q5SX56             | Sperm-associated antigen 7                                                                                                                     |
| Q60972             | Histone-binding protein RBBP4                                                                                                                  |
| Q62351             | Transferrin receptor protein 1                                                                                                                 |
| Q6P8I4             | PEST proteolytic signal-containing nuclear protein                                                                                             |
| Q7M739             | Nucleoprotein TPR                                                                                                                              |
| Q8K3C3             | Protein LZIC                                                                                                                                   |
| Q8R3V2             | Aminoacyl tRNA synthase complex-interacting multifunctional protein 2                                                                          |
| Q920A5             | Retinoid-inducible serine carboxypeptidase                                                                                                     |
| Q9CPS5             | 26S proteasome non-ATPase regulatory subunit 8                                                                                                 |
| Q9CQ69             | Cytochrome b-c1 complex subunit 8                                                                                                              |
| Q9CQN6             | Transmembrane protein 14C                                                                                                                      |
| Q9D0F9             | Phosphoglucomutase-1                                                                                                                           |
| Q9D1E6             | Tubulin-folding cofactor B                                                                                                                     |
| Q9D1K2             | V-type proton ATPase subunit F                                                                                                                 |
| Q9D554             | Splicing factor 3A subunit 3                                                                                                                   |
| Q9D6U8             | Protein FAM162A                                                                                                                                |
| Q9DB20             | ATP synthase subunit O, mitochondrial                                                                                                          |
| Q9R0B9             | Procollagen-lysine,2-oxoglutarate 5-dioxygenase 2                                                                                              |
| Q9WUK2-2           | Eukaryotic translation initiation factor 4H                                                                                                    |

**Supplementary Table 4:** List of proteins detected in both CFZ and CONT groups, missing in BTZ group following 24 h of treatment.

| <b>Protein IDs</b> | <b>Protein Names</b>                                                                                        |
|--------------------|-------------------------------------------------------------------------------------------------------------|
| <b>A2AFK7</b>      | Eukaryotic initiation factor 4A-III;Eukaryotic initiation factor 4A-III, N-terminally processed             |
| <b>D3Z375</b>      | Astrocytic phosphoprotein PEA-15                                                                            |
| <b>E9PWE8</b>      | Dihydropyrimidinase-related protein 3                                                                       |
| <b>G3UYV7</b>      | 40S ribosomal protein S28                                                                                   |
| <b>O08795</b>      | Glucosidase 2 subunit beta                                                                                  |
| <b>O55137</b>      | Acyl-coenzyme A thioesterase 1;Acyl-coenzyme A thioesterase 3;Acyl-coenzyme A thioesterase 2, mitochondrial |
| <b>P05063</b>      | Fructose-bisphosphate aldolase C                                                                            |
| <b>P24527</b>      | Leukotriene A-4 hydrolase                                                                                   |
| <b>P30416</b>      | Peptidyl-prolyl cis-trans isomerase FKBP4;Peptidyl-prolyl cis-trans isomerase FKBP4, N-terminally processed |
| <b>P30681</b>      | High mobility group protein B2                                                                              |
| <b>P50518</b>      | V-type proton ATPase subunit E 1                                                                            |
| <b>P51174</b>      | Long-chain specific acyl-CoA dehydrogenase, mitochondrial                                                   |
| <b>P59017</b>      | Bcl-2-like protein 13                                                                                       |
| <b>P61924</b>      | Coatamer subunit zeta-1                                                                                     |
| <b>P62322</b>      | U6 snRNA-associated Sm-like protein LSm5                                                                    |
| <b>P62774</b>      | Myotrophin                                                                                                  |
| <b>P62843</b>      | 40S ribosomal protein S15                                                                                   |
| <b>P68037</b>      | Ubiquitin-conjugating enzyme E2 L3                                                                          |
| <b>P99027</b>      | 60S acidic ribosomal protein P2                                                                             |
| <b>Q3U6K9</b>      | Phosphoserine aminotransferase                                                                              |
| <b>Q5SW88</b>      | Ras-related protein Rab-1A                                                                                  |
| <b>Q60931</b>      | Voltage-dependent anion-selective channel protein 3                                                         |
| <b>Q61753</b>      | D-3-phosphoglycerate dehydrogenase                                                                          |
| <b>Q62084</b>      | Protein phosphatase 1 regulatory subunit 14B                                                                |
| <b>Q62093</b>      | Serine/arginine-rich splicing factor 2                                                                      |
| <b>Q62318</b>      | Transcription intermediary factor 1-beta                                                                    |
| <b>Q6P5H2-2</b>    | Nestin                                                                                                      |
| <b>Q8BH59</b>      | Calcium-binding mitochondrial carrier protein Aralar1                                                       |
| <b>Q8CHH9</b>      | Septin-8                                                                                                    |
| <b>Q8CIG8</b>      | Protein arginine N-methyltransferase 5                                                                      |
| <b>Q8JZQ9</b>      | Eukaryotic translation initiation factor 3 subunit B                                                        |
| <b>Q8K4Z5</b>      | Splicing factor 3A subunit 1                                                                                |
| <b>Q91VM5</b>      | RNA binding motif protein, X-linked-like-1                                                                  |
| <b>Q91WK5</b>      | Glycine cleavage system H protein, mitochondrial                                                            |
| <b>Q9CXY6</b>      | Interleukin enhancer-binding factor 2                                                                       |
| <b>Q9CY58-3</b>    | Plasminogen activator inhibitor 1 RNA-binding protein                                                       |
| <b>Q9CYN2</b>      | Signal peptidase complex subunit 2                                                                          |
| <b>Q9CZD3</b>      | Glycine--tRNA ligase                                                                                        |
| <b>Q9CZN7</b>      | Serine hydroxymethyltransferase                                                                             |
| <b>Q9D051</b>      | Pyruvate dehydrogenase E1 component subunit beta, mitochondrial                                             |
| <b>Q9D1D4</b>      | Transmembrane emp24 domain-containing protein 10                                                            |
| <b>Q9WTP6-2</b>    | Adenylate kinase 2, mitochondrial;Adenylate kinase 2, mitochondrial, N-terminally processed                 |
| <b>Q9WUM4</b>      | Coronin-1C                                                                                                  |
| <b>Q9Z1F9</b>      | SUMO-activating enzyme subunit 2                                                                            |

**Supplementary Table 5:** List of proteins detected in both BTZ and CONT groups, missing in CFZ group following 24 h of treatment.

| <b>Protein IDS</b> | <b>Protein Names</b>                                                                                                        |
|--------------------|-----------------------------------------------------------------------------------------------------------------------------|
| E0CXB2             | Importin-9                                                                                                                  |
| E9QA63             | Microtubule-actin cross-linking factor 1                                                                                    |
| H3BL49             | T-complex protein 1 subunit theta                                                                                           |
| O08583-2           | THO complex subunit 4;Aly/REF export factor 2                                                                               |
| O35286             | Putative pre-mRNA-splicing factor ATP-dependent RNA helicase DHX15                                                          |
| O35593             | 26S proteasome non-ATPase regulatory subunit 14                                                                             |
| O35604             | Niemann-Pick C1 protein                                                                                                     |
| O70503             | Estradiol 17-beta-dehydrogenase 12                                                                                          |
| P08003             | Protein disulfide-isomerase A4                                                                                              |
| P13439             | Uridine 5-monophosphate synthase;Orotate phosphoribosyltransferase;Orotidine 5-phosphate decarboxylase                      |
| P14148             | 60S ribosomal protein L7                                                                                                    |
| P20065-2           | Thymosin beta-4;Hematopoietic system regulatory peptide                                                                     |
| P24547             | Inosine-5-monophosphate dehydrogenase 2                                                                                     |
| P26645             | Myristoylated alanine-rich C-kinase substrate                                                                               |
| P50247             | Adenosylhomocysteinase                                                                                                      |
| P51410             | 60S ribosomal protein L9                                                                                                    |
| P61620             | Protein transport protein Sec61 subunit alpha isoform 1;Protein transport protein Sec61 subunit alpha isoform 2             |
| P61759             | Prefoldin subunit 3                                                                                                         |
| P63085             | Mitogen-activated protein kinase 1;Mitogen-activated protein kinase 3                                                       |
| P70296             | Phosphatidylethanolamine-binding protein 1;Hippocampal cholinergic neurostimulating peptide                                 |
| Q3TVK3             | Aspartyl aminopeptidase                                                                                                     |
| Q4KML4             | Costars family protein ABRACL                                                                                               |
| Q61990-2           | Poly(rC)-binding protein 2                                                                                                  |
| Q64522             | Histone H2A type 2-B                                                                                                        |
| Q6PDM2             | Serine/arginine-rich splicing factor 1                                                                                      |
| Q6ZQ38             | Cullin-associated NEDD8-dissociated protein 1                                                                               |
| Q8BIJ6             | Isoleucine--tRNA ligase, mitochondrial                                                                                      |
| Q8BMS1             | Trifunctional enzyme subunit alpha, mitochondrial;Long-chain enoyl-CoA hydratase;Long chain 3-hydroxyacyl-CoA dehydrogenase |
| Q91Z31             | Polypyrimidine tract-binding protein 2                                                                                      |
| Q921H8             | 3-ketoacyl-CoA thiolase A, peroxisomal;3-ketoacyl-CoA thiolase B, peroxisomal                                               |
| Q99JR1             | Sideroflexin-1                                                                                                              |
| Q99KI0             | Aconitate hydratase, mitochondrial                                                                                          |
| Q9CX86             | Heterogeneous nuclear ribonucleoprotein A0                                                                                  |
| Q9DAS9             | Guanine nucleotide-binding protein G(I)/G(S)/G(O) subunit gamma-12                                                          |
| Q9ERD7             | Tubulin beta-3 chain                                                                                                        |
| Q9JKK7             | Tropomodulin-2                                                                                                              |
| Q9Z110-2           | Delta-1-pyrroline-5-carboxylate synthase;Glutamate 5-kinase;Gamma-glutamyl phosphate reductase                              |

**Supplementary Table 6:** List of proteins detected in both BTZ and CFZ groups, missing in CONT group following 24 h of treatment.

| <b>Protein IDs</b> | <b>Protein Names</b>                                                                                                                                                                                                                                                |
|--------------------|---------------------------------------------------------------------------------------------------------------------------------------------------------------------------------------------------------------------------------------------------------------------|
| D3YUK4             | NADH dehydrogenase [ubiquinone] 1 beta subcomplex subunit 10                                                                                                                                                                                                        |
| P07356             | Annexin A2                                                                                                                                                                                                                                                          |
| P09055             | Integrin beta-1                                                                                                                                                                                                                                                     |
| P12787             | Cytochrome c oxidase subunit 5A, mitochondrial                                                                                                                                                                                                                      |
| P14206             | 40S ribosomal protein SA                                                                                                                                                                                                                                            |
| P17710-3           | Hexokinase-1                                                                                                                                                                                                                                                        |
| P17918             | Proliferating cell nuclear antigen                                                                                                                                                                                                                                  |
| P31650             | Sodium- and chloride-dependent GABA transporter 3                                                                                                                                                                                                                   |
| P43024             | Cytochrome c oxidase subunit 6A1, mitochondrial;Cytochrome c oxidase subunit 6A, mitochondrial                                                                                                                                                                      |
| P63037             | DnaJ homolog subfamily A member 1                                                                                                                                                                                                                                   |
| P68510             | 14-3-3 protein eta                                                                                                                                                                                                                                                  |
| Q61696             | Heat shock 70 kDa protein 1A;Heat shock 70 kDa protein 1B                                                                                                                                                                                                           |
| Q64433             | 10 kDa heat shock protein, mitochondrial                                                                                                                                                                                                                            |
| Q80X19-2           | Collagen alpha-1(XIV) chain                                                                                                                                                                                                                                         |
| Q91WK2             | Eukaryotic translation initiation factor 3 subunit H                                                                                                                                                                                                                |
| Q91ZX7             | Pro-low-density lipoprotein receptor-related protein 1;Low-density lipoprotein receptor-related protein 1 85 kDa subunit;Low-density lipoprotein receptor-related protein 1 515 kDa subunit;Low-density lipoprotein receptor-related protein 1 intracellular domain |
| Q9CQF9             | Prenylcysteine oxidase                                                                                                                                                                                                                                              |
| Q9D0M3-2           | Cytochrome c1, heme protein, mitochondrial                                                                                                                                                                                                                          |
| Q9D1Q6             | Endoplasmic reticulum resident protein 44                                                                                                                                                                                                                           |
| Q9D6R2-2           | Isocitrate dehydrogenase [NAD] subunit alpha, mitochondrial                                                                                                                                                                                                         |
| Q9D7N9             | Adipocyte plasma membrane-associated protein                                                                                                                                                                                                                        |

A

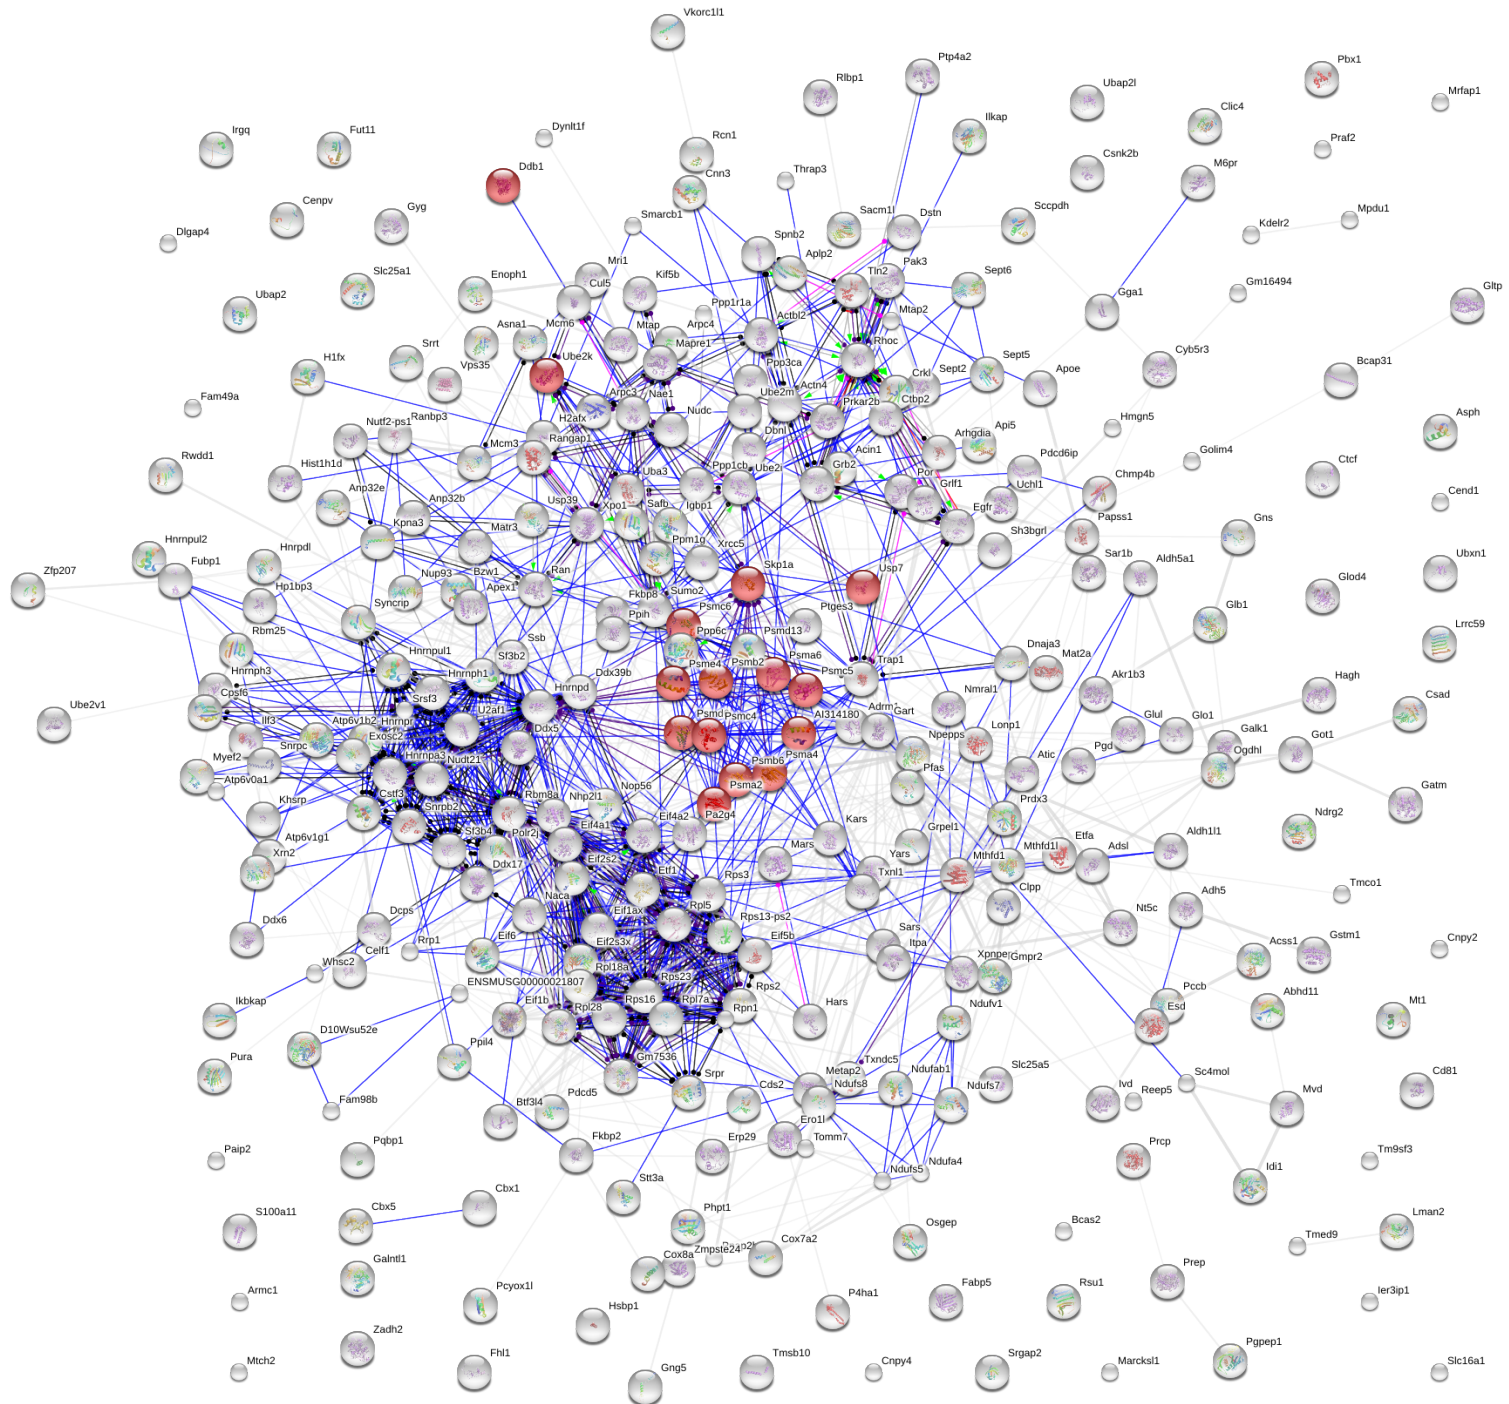

B

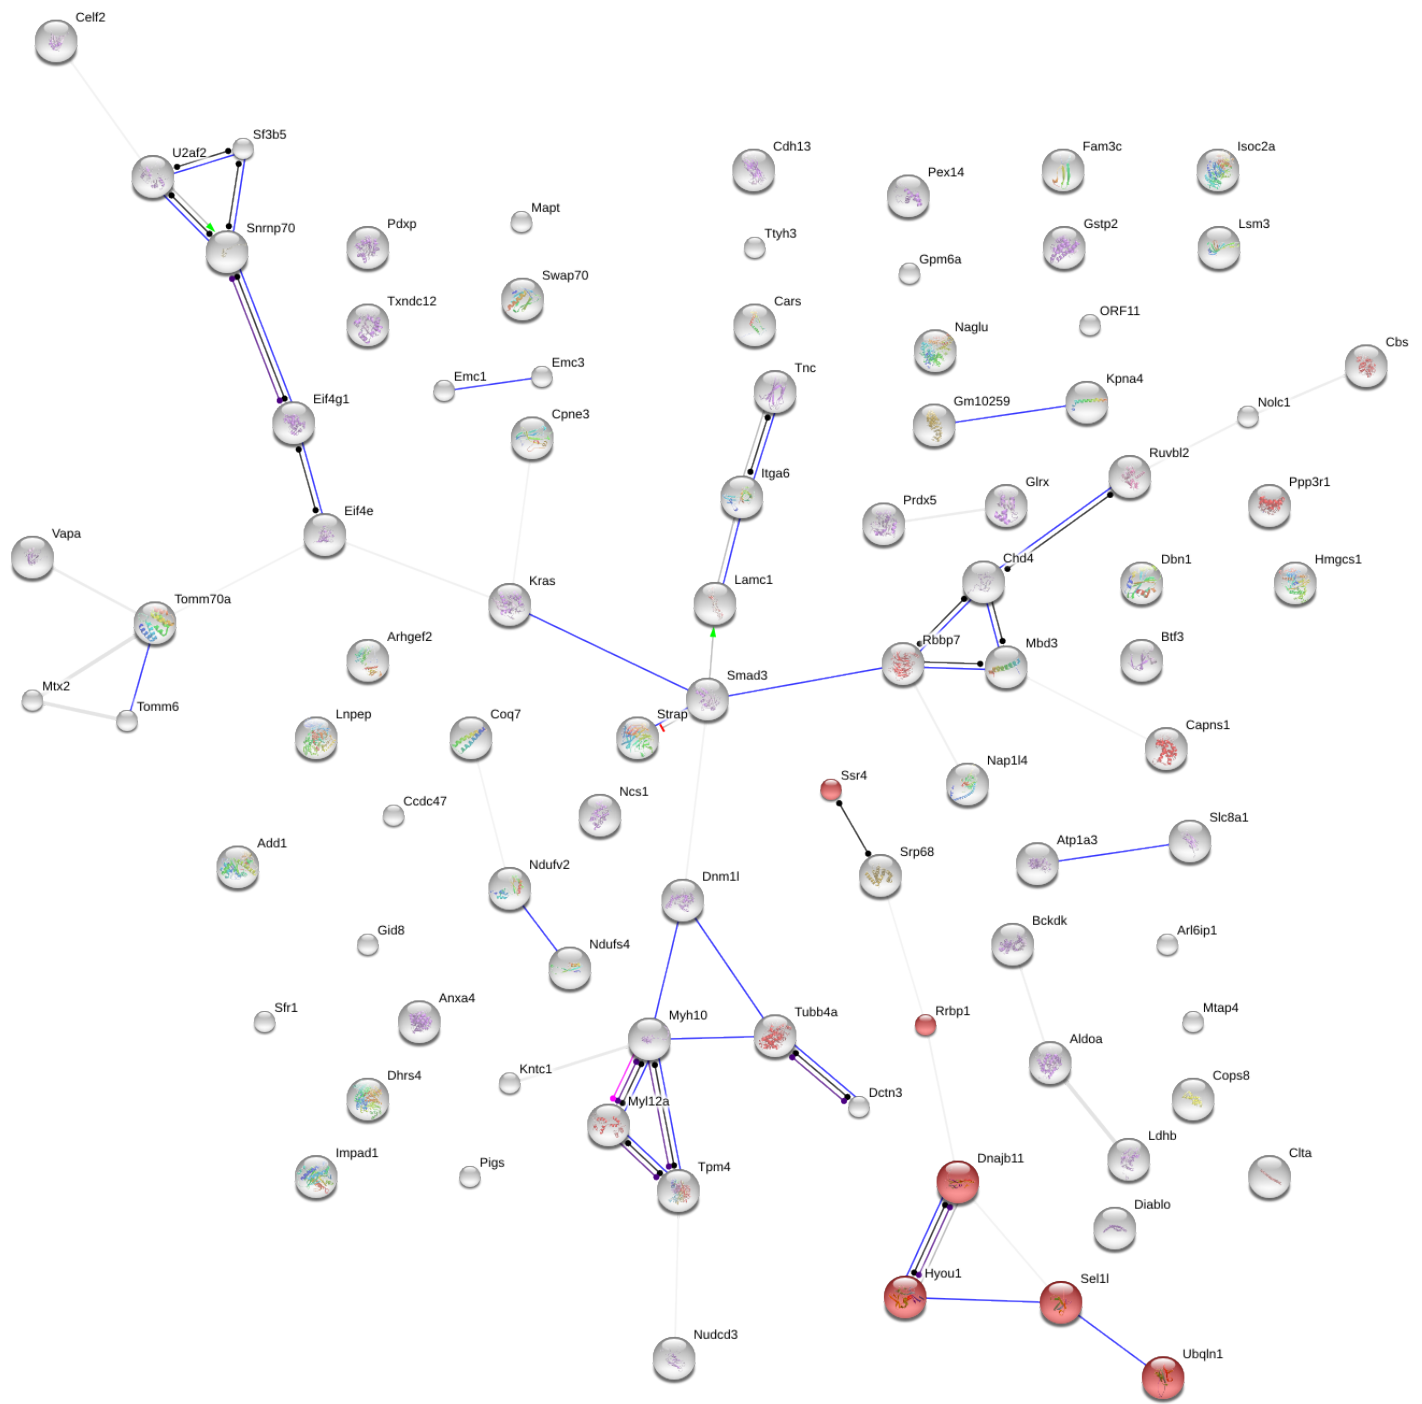





**Supplementary Figure 1:** Proteins and their distributions following 100 nM BTZ and CFZ treatment in mouse E14 embryo-derived NSCS. Listed proteins are detected only in one group following drug treatments. **A.** CONT 24h, proteins shown with red are involved in ubiquitin proteasome system. **B.** BTZ 24h, proteins shown with red are involved in ER pathways and **C.** CFZ 24h, proteins shown with red are involved in oxidative phosphorylation. Figures were created with String v.10.0. Small nodes: protein of unknown 3D structure and large nodes: some 3D structure is known or predicted.

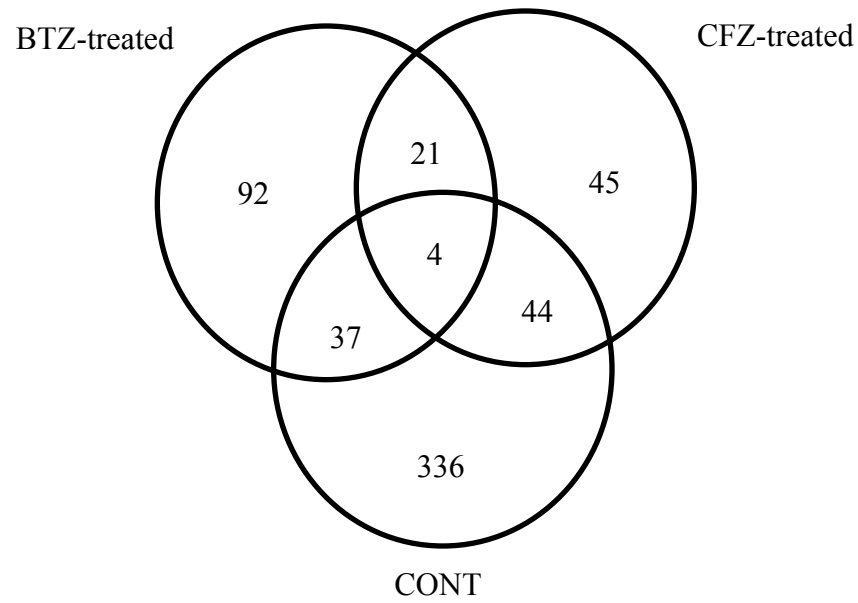

**Supplementary Figure 2:** Venn diagram indicating the overlap between the differentially expressed proteins identified in three different groups (CONT, BTZ and CFZ).

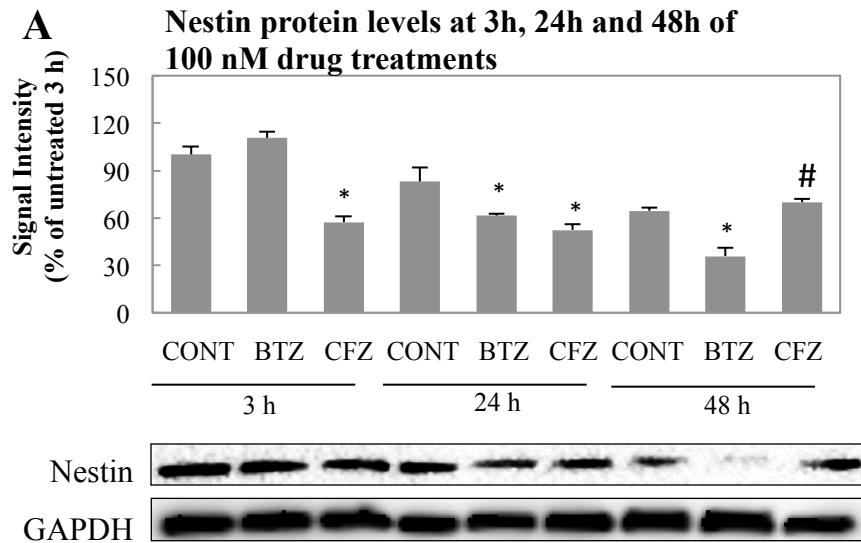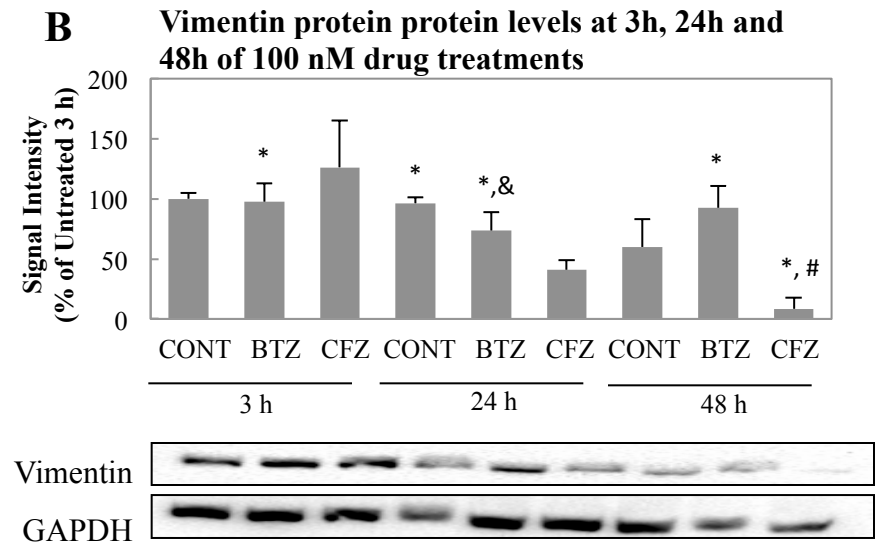

**Supplementary Figure 3:** Effects on cytoskeletal proteins **A. Nestin** and **B. Vimentin** in mouse NSCs following 3h, 24h and 48h of 100 nM BTZ and CFZ treatments. CONT 3h was set as 100%. Percentage of all lanes was calculated as proportioning the lane density to CONT 3h. Data denote mean  $\pm$  % S.D. (n=3). \*  $p < 0.05$  vs CONT group of each time point, &  $p < 0.05$  CFZ 24h vs BTZ 24h, #  $p < 0.05$  CFZ 48h vs BTZ 48h. Blots are cropped to improve the clarity. Full-length blots are included in the Supplementary Data.

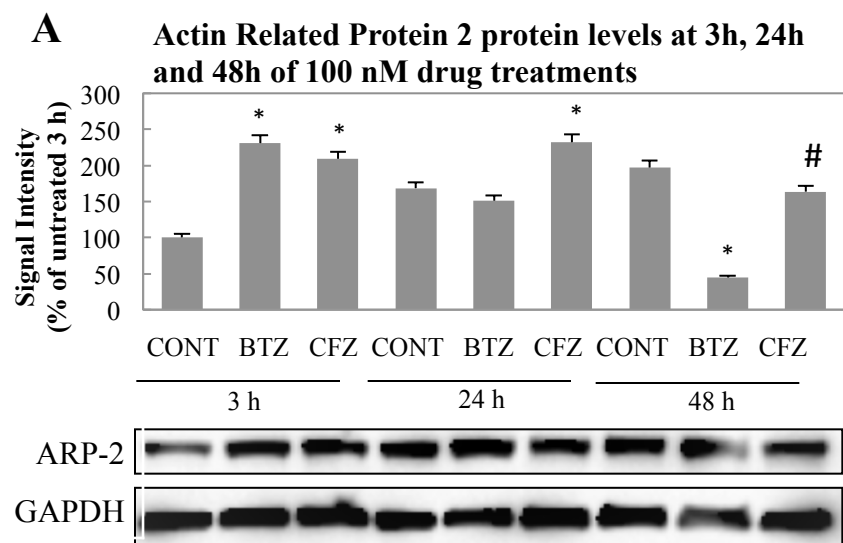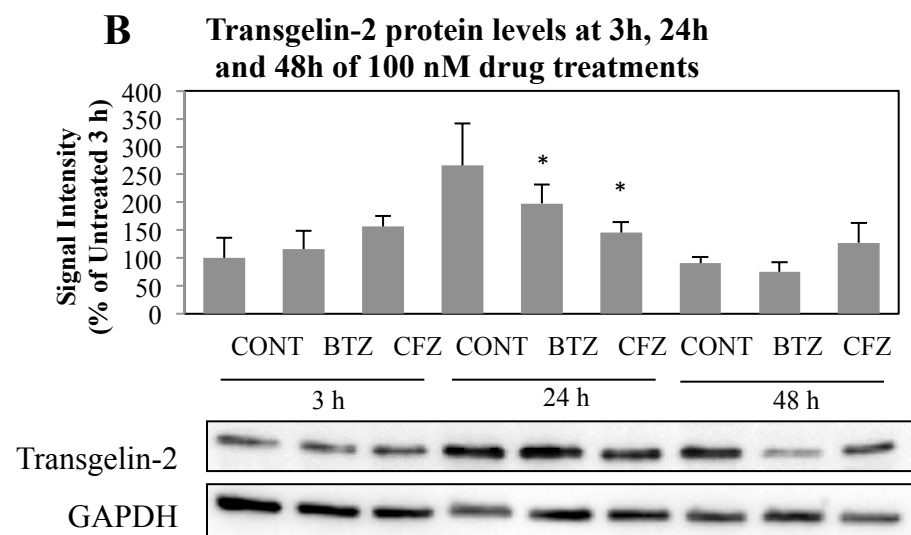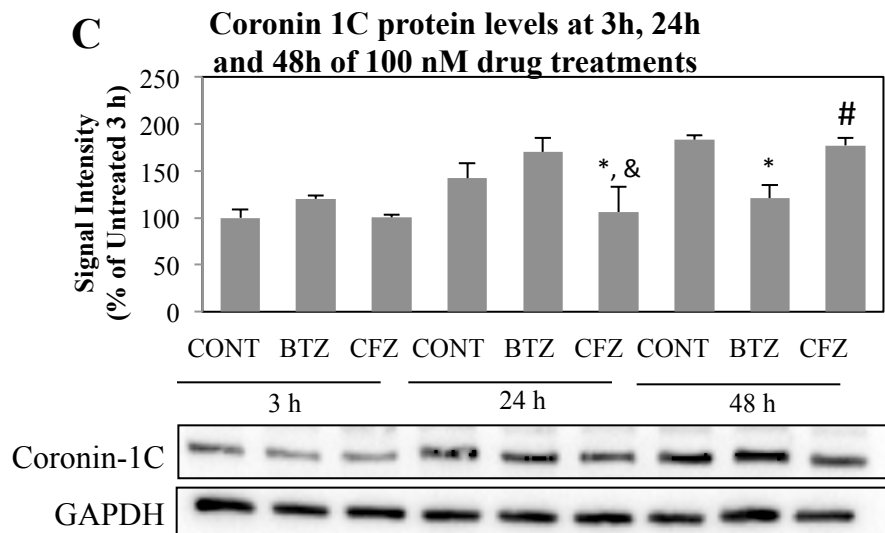

**Supplementary Figure 4:** Effects on actin related protein-2, transgelin-2 and coronin 1C protein expressions in mouse NSCs following 3h, 24h and 48h of 100 nM BTZ and CFZ treatments. CONT 3h was set as 100%. Percentage of all lanes was calculated as proportioning the lane density to CONT 3h. Data denote mean  $\pm$  % S.D. (n=3). \*  $p < 0.05$  vs CONT group of each time point, &  $p < 0.05$  CFZ 24h vs BTZ 24h, #  $p < 0.05$  CFZ 48h vs BTZ 48h. Blot is cropped to improve the clarity. Full-length blots are included in the Supplementary Data.

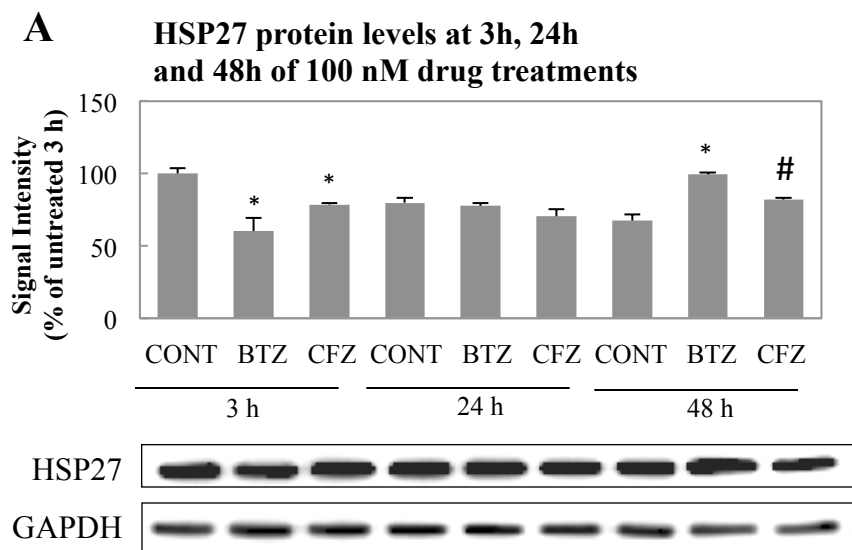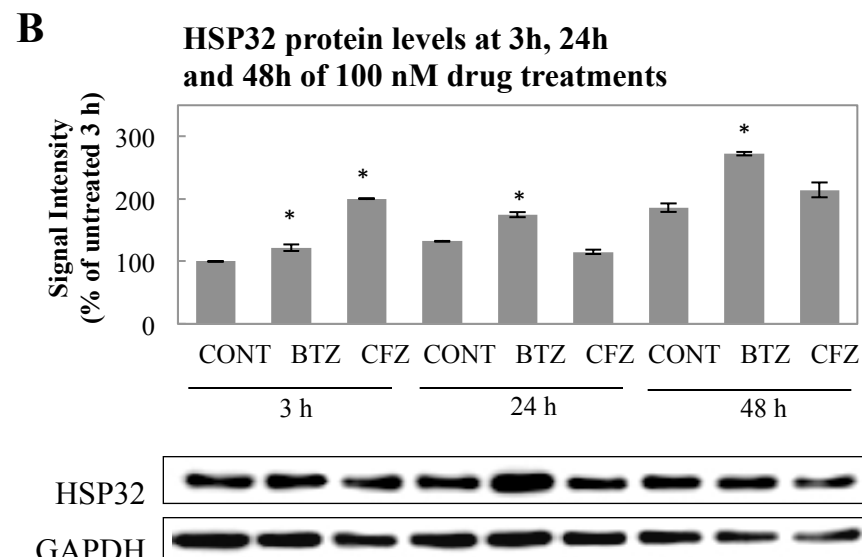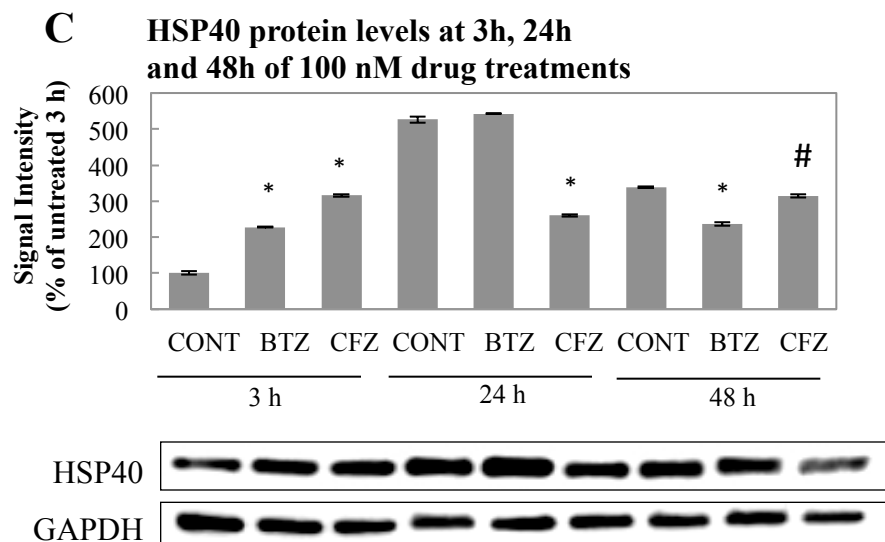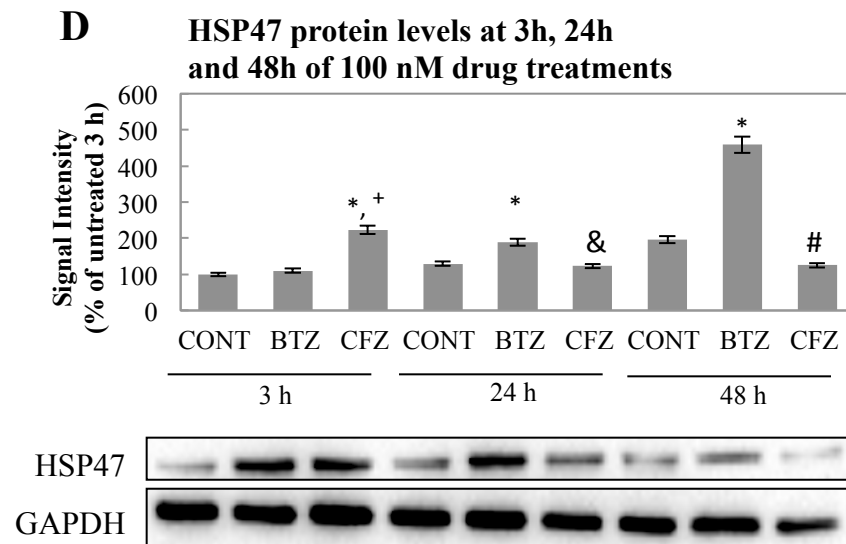

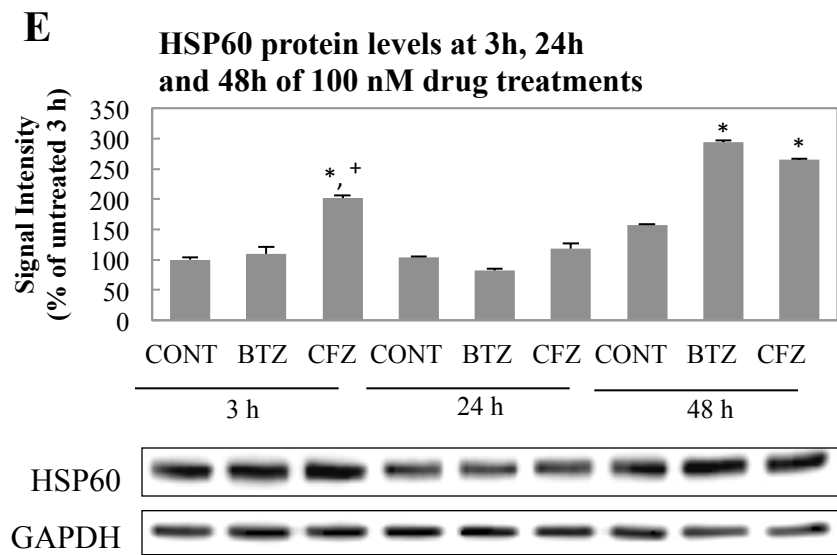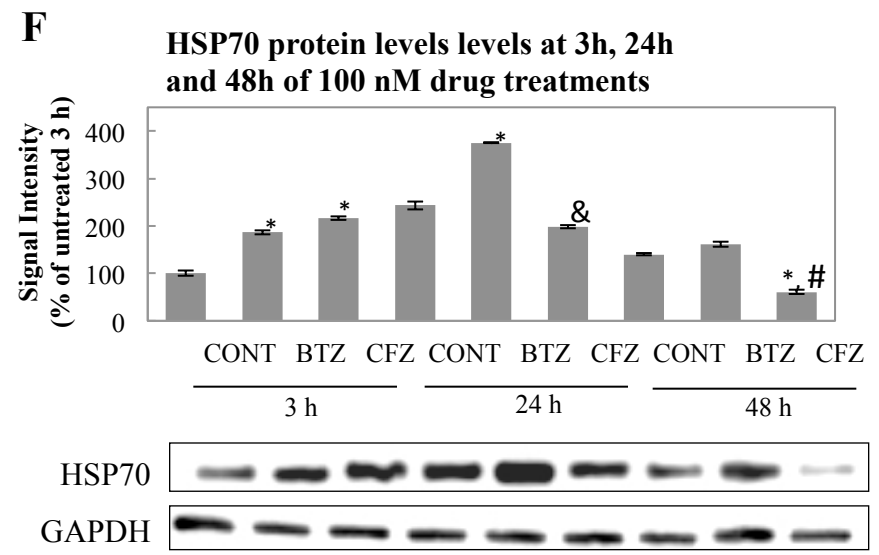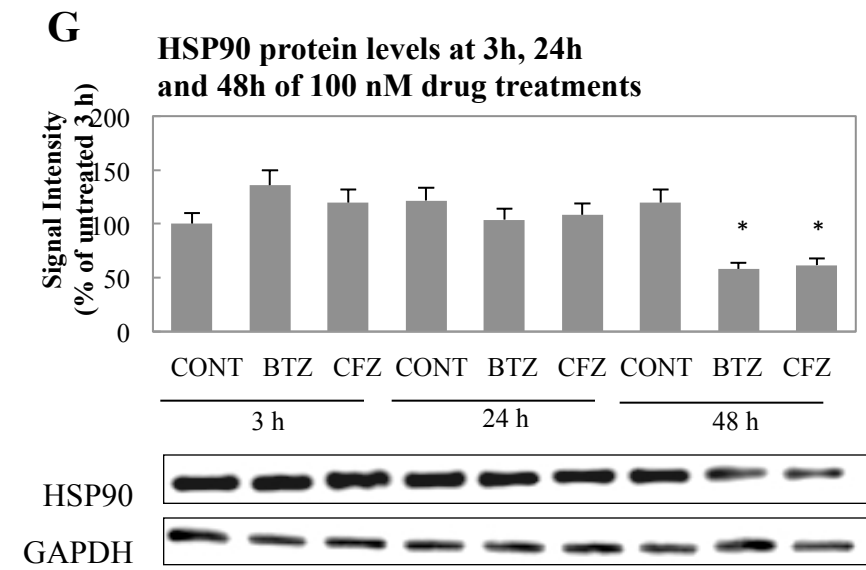

**Supplementary Figure 5:** Effects on heat shock proteins (HSPs) in mouse NSCs following 3h, 24h and 48h of 100 nM BTZ and CFZ treatments. CONT 3h was set as 100%. Percentage of all lanes was calculated as proportioning the lane density to CONT 3h. Data denote mean  $\pm$  % S.D. (n=3). \*  $p < 0.05$  vs CONT group of each time point, &  $p < 0.05$  CFZ 24h vs BTZ 24h, #  $p < 0.05$  CFZ 48h vs BTZ 48h. Blot is cropped to improve the clarity. Full-length blots are included in the Supplementary Data.

**A** Proteasome activity following 3h, 24h and 48h of 100 nM drug treatment in H9c2 cardiomyoblasts

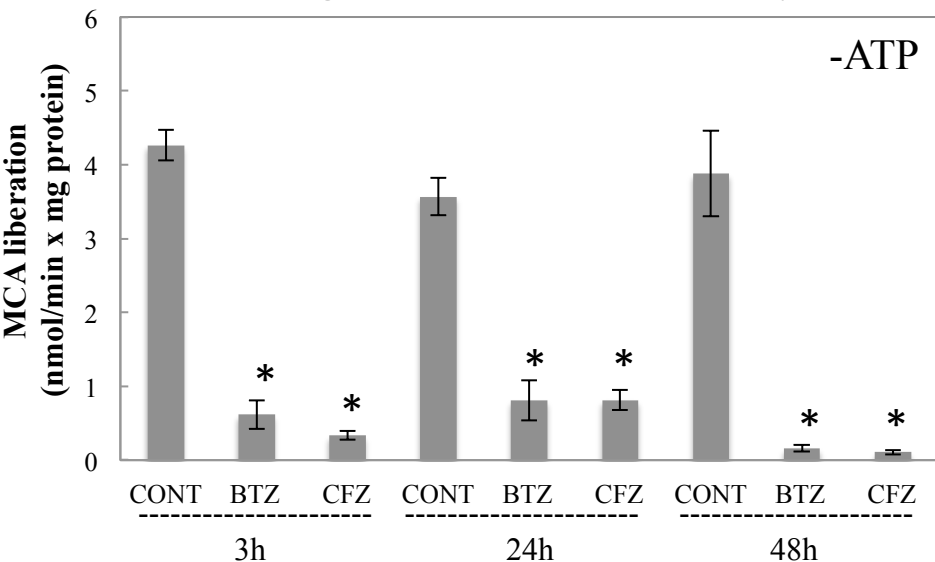

**B** Proteasome activity following 3h, 24h and 48h of 100 nM drug treatment in H9c2 cardiomyoblasts

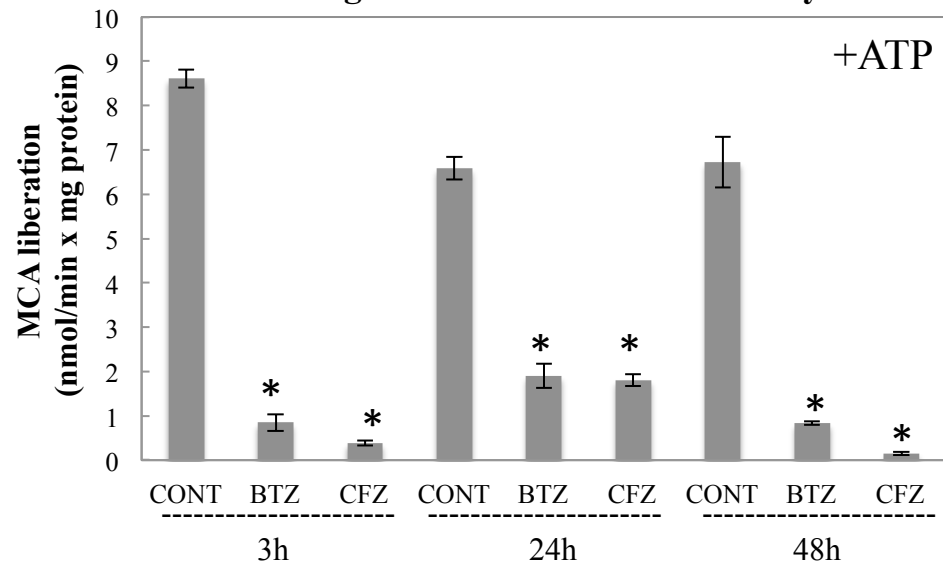

**C** Proteasome activity following 3h, 24h and 48h of 100 nM drug treatment in BALB/3T3 fibroblasts

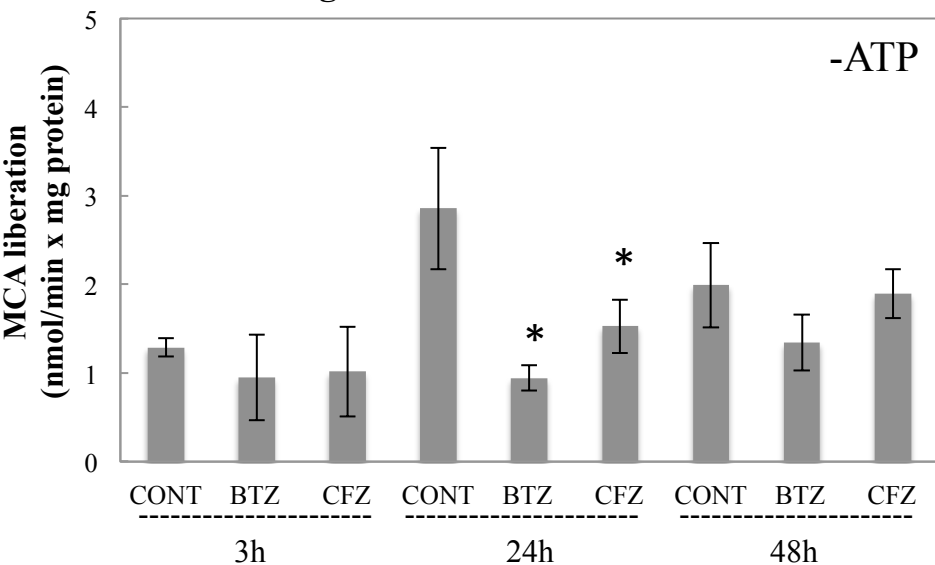

**D** Proteasome activity following 3h, 24h and 48h of 100 nM drug treatment in BALB/3T3 fibroblasts

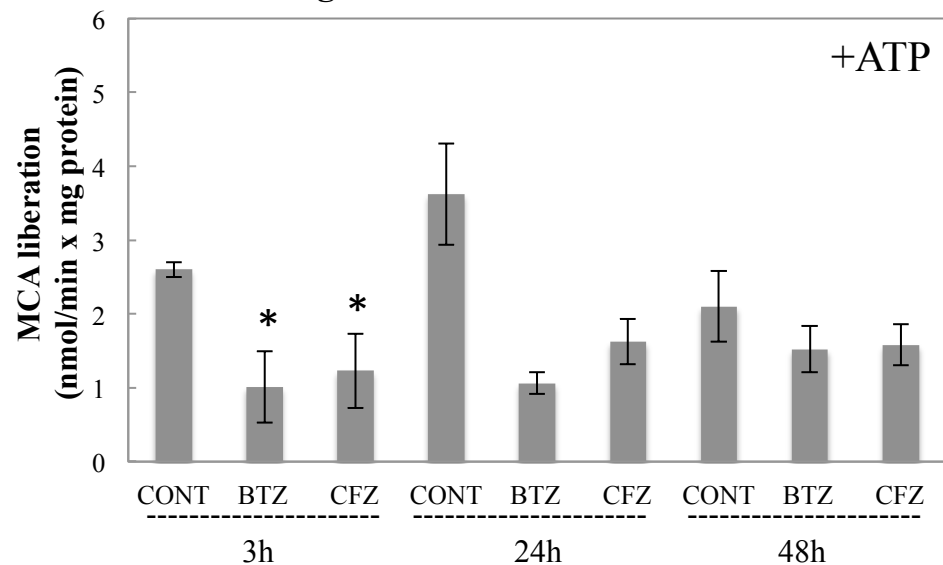



**Supplementary Figure 6:** Effects on proteasome activity in H9c2 cardiomyoblasts and BALB/3T3 embryo fibroblasts. Data denote mean  $\pm$  S.D. \* $p < 0.05$  vs. CONT (n = 3). Results were evaluated with ANOVA test followed by multiple comparison analysis. (A) represents proteasome activity without ATP addition in H9c2 cells; (B) represents proteasome activity with ATP addition into the reaction mixtures in H9c2 cells; (C) represents proteasome activity without ATP addition in BALB/3T3 cells; (B) represents proteasome activity with ATP addition into the reaction mixtures in BALB/3T3 cells.

**A** Nestin protein levels at 3h, 24h and 48h of drug treatments in H9c2 cardiomyoblasts

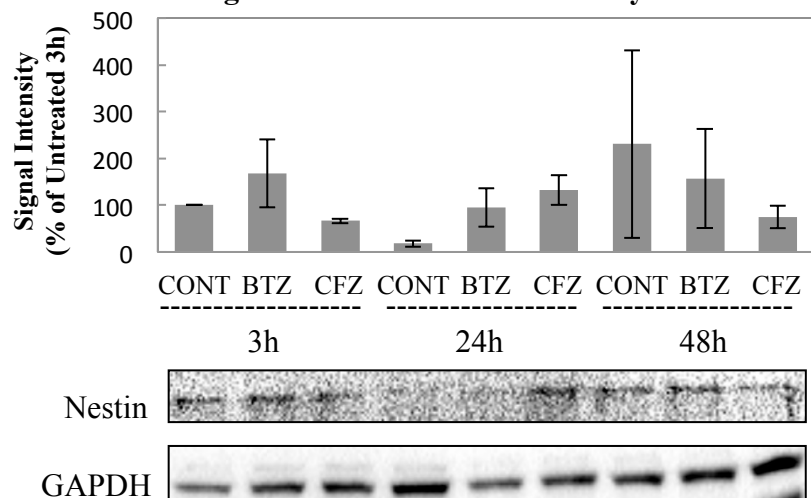

**B** Vimentin protein levels at 3h, 24h and 48h of drug treatments in H9c2 cardiomyoblasts

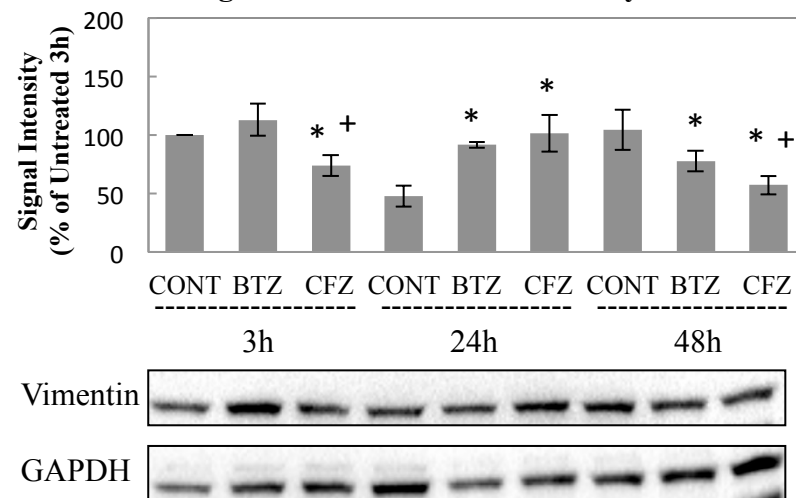

**C** Nestin protein levels at 3h, 24h and 48h of drug treatments in BALB/3T3 fibroblasts

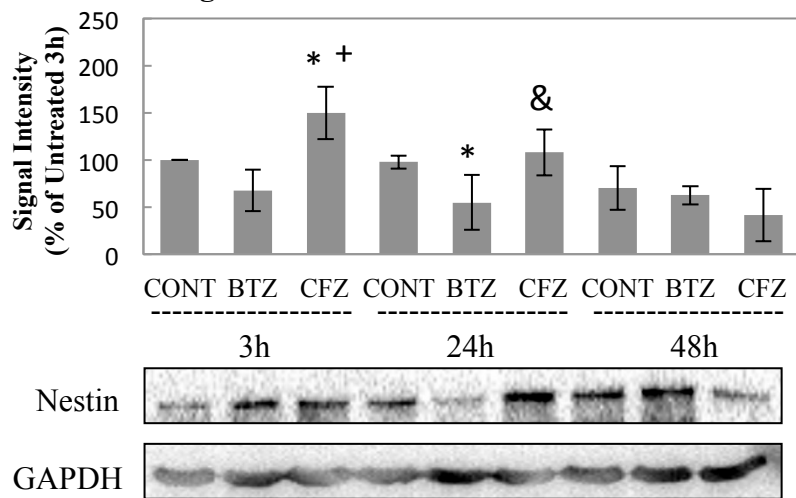

**D** Vimentin protein levels at 3h, 24h and 48h of drug treatments in BALB/3T3 fibroblasts

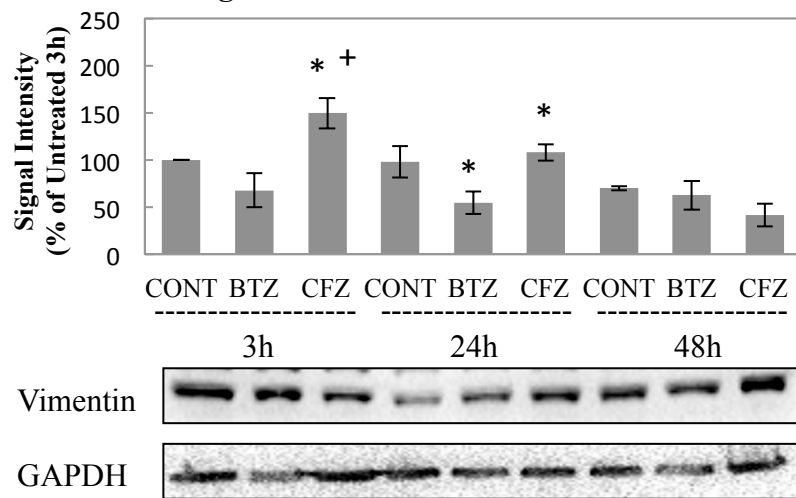

**Supplementary Figure 7:** Effects on nestin and vimentin proteins in H9c2 cardiomyoblasts and BALB/3T3 embryo fibroblasts following 3h, 24h and 48 h of 100 nM BTZ and CFZ treatments. **A** and **B.** Nestin expression and Vimentin expression in H9c2 cardiomyoblasts. **C** and **D.** Nestin expression and Vimentin expression in BALB/3T3 embryo fibroblasts. CONT 3h was set to 100%. Percentage of all lanes was calculated as proportioning the lane density to CONT 3h Data denote mean  $\pm$  % S.D. \*  $p < 0.05$  vs CONT group of each time point, +  $p < 0.05$  CFZ 3h vs BTZ 3h, &  $p < 0.05$  CFZ 24h vs BTZ 24h. Blot is cropped to improve the clarity. Full-length blots are included in the Supplementary Data.

**A Actin related protein-2 levels at 3h, 24h and 48h of drug treatments in H9c2 cardiomyoblasts**

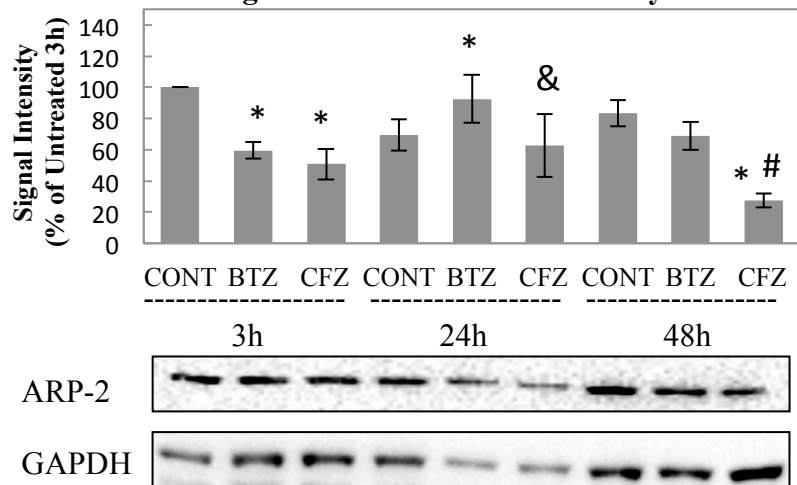

**B Transgelin-2 protein levels at 3h, 24h and 48h of drug treatments in H9c2 cardiomyoblasts**

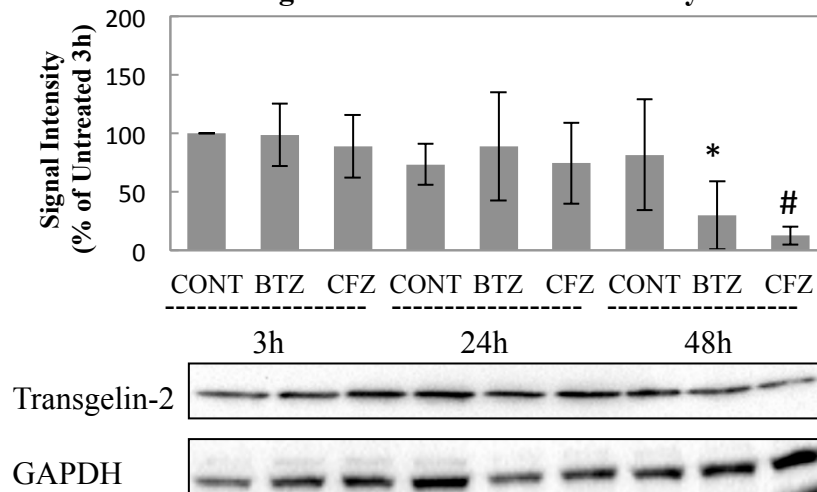

**C Coronin-1C protein levels at 3h, 24h and 48h of drug treatments in H9c2 cardiomyoblasts**

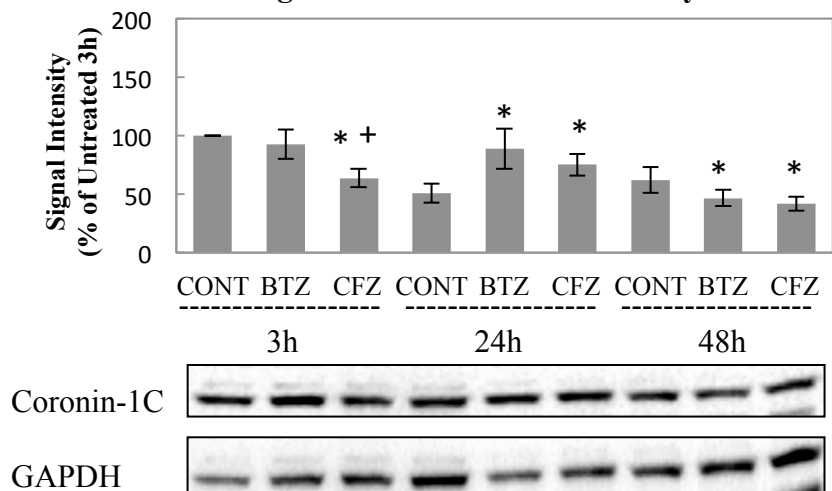

**D Coronin-1C protein levels at 3h, 24h and 48h of drug treatments in BALB/3T3 fibroblasts**

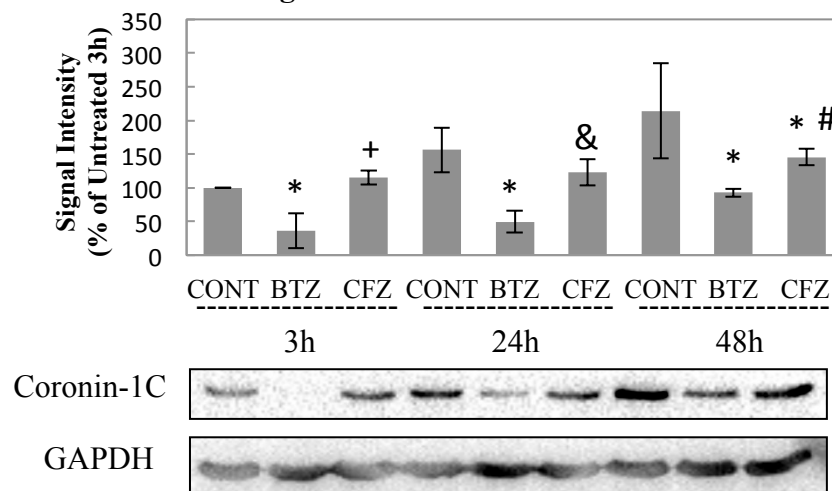

**Supplementary Figure 8:** Effects on ARP-2, transgelin-2 and coronin-1C proteins in H9c2 cardiomyoblasts and BALB/3T3 embryo fibroblasts following 3h, 24h and 48 h of 100 nM BTZ and CFZ treatments. **A.** ARP-2, **B.** Nestin and **C.** Coronin-1C expressions in H9c2 cardiomyoblasts. **D.** Coronin-1C expressions in BALB/3T3 embryo fibroblasts. CONT 3h was set to 100%. Percentage of all lanes was calculated as proportioning the lane density to CONT 3h Data denote mean  $\pm$  % S.D. \*  $p < 0.05$  vs CONT group of each time point, +  $p < 0.05$  CFZ 3h vs BTZ 3h, &  $p < 0.05$  CFZ 24h vs BTZ 24h, #  $p < 0.05$  CFZ 48h vs BTZ 48h. Blot is cropped to improve the clarity. Full-length blots are included in the Supplementary Data.

**A**

**HSP32 protein levels at 3h, 24h and 48h of drug treatments in H9c2 cardiomyoblasts**

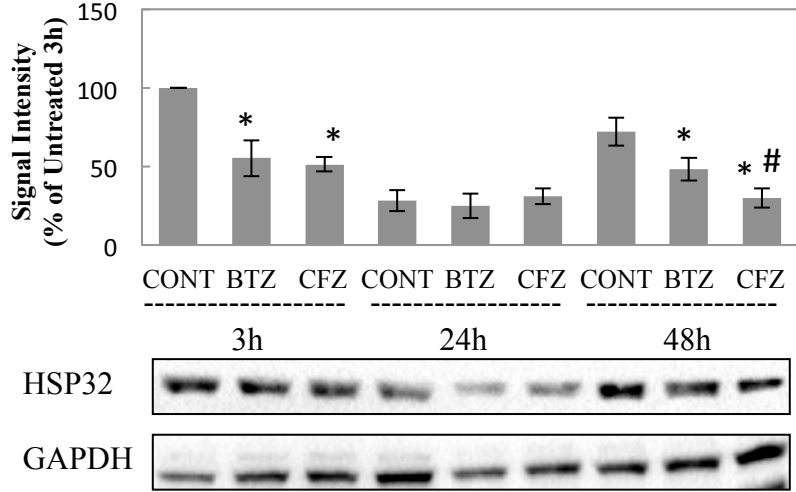

**B**

**HSP47 protein levels at 3h, 24h and 48h of drug treatments in H9c2 cardiomyoblasts**

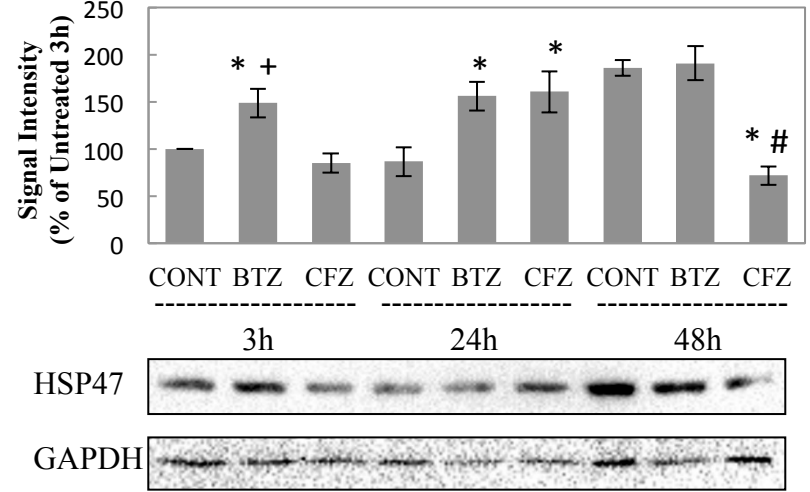

**C**

**HSP70 protein levels at 3h, 24h and 48h of drug treatments in H9c2 cardiomyoblasts**

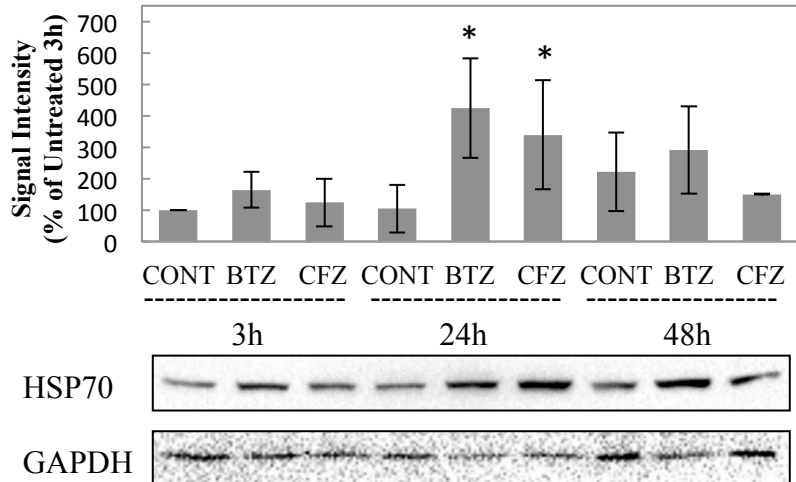

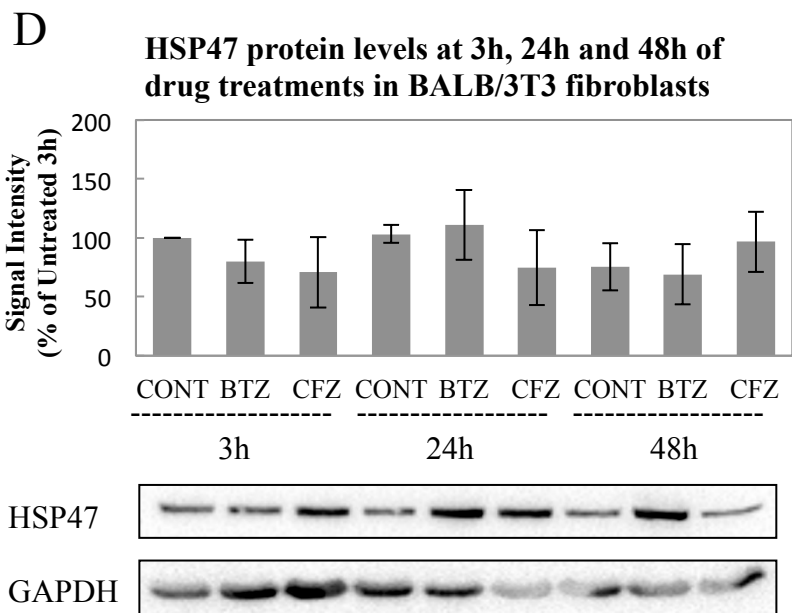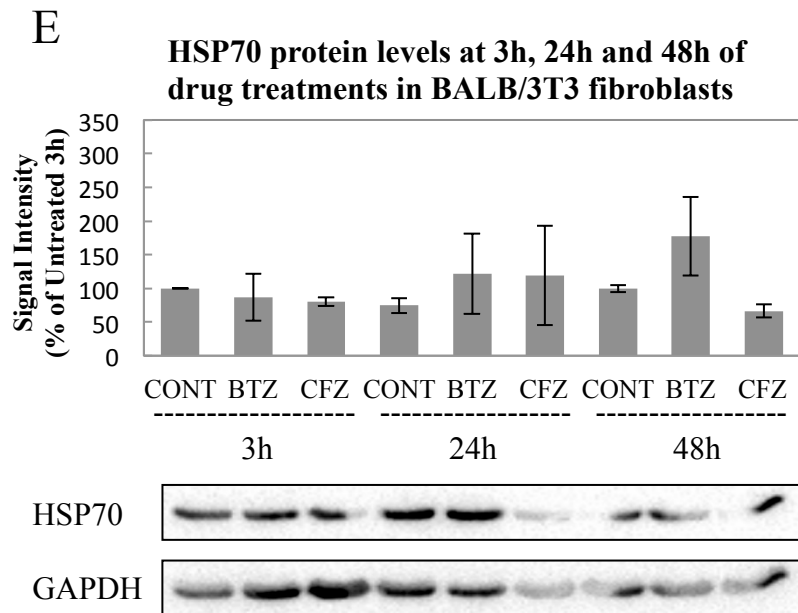

**Supplementary Figure 9:** Effects on heat shock proteins (HSPs) in H9c2 cardiomyoblasts and BALB/3T3 embryo fibroblasts following 3h, 24h and 48 h of 100 nM BTZ and CFZ treatments. **A.** HSP32, **B.** HSP47 and **C.** HSP70 expressions in H9c2 cardiomyoblasts. **D.** HSP47, **E.** HSP70 expressions in BALB/3T3 embryo fibroblasts. CONT 3h was set to 100%. Percentage of all lanes was calculated as proportioning the lane density to CONT 3h. Data denote mean  $\pm$  % S.D. \*  $p < 0.05$  vs CONT group of each time point, +  $p < 0.05$  CFZ 3h vs BTZ 3h, &  $p < 0.05$  CFZ 24h vs BTZ 24h, #  $p < 0.05$  CFZ 48h vs BTZ 48h. Blot is cropped to improve the clarity. Full-length blots are included in the Supplementary Data.

**A** GRP78 protein levels at 3h, 24h and 48h of drug treatments in H9c2 cardiomyoblasts

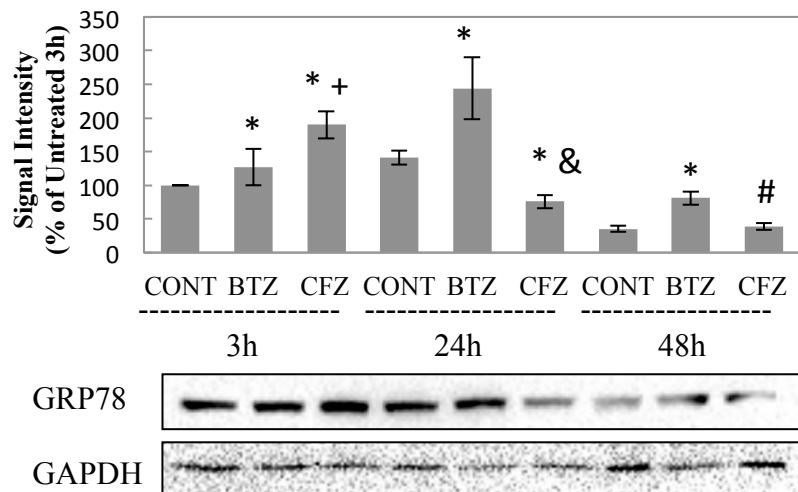

**B** GRP94 protein levels at 3h, 24h and 48h of drug treatments in H9c2 cardiomyoblasts

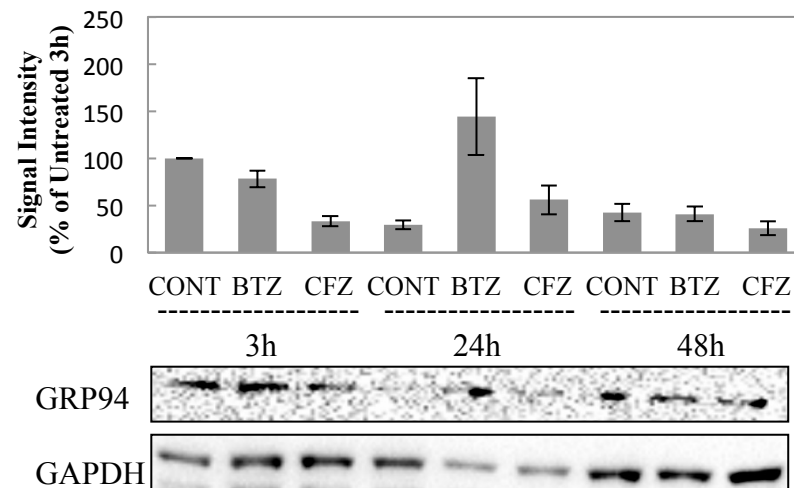

**C** GRP78 protein levels at 3h, 24h and 48h of drug treatments in BALB/3T3 fibroblasts

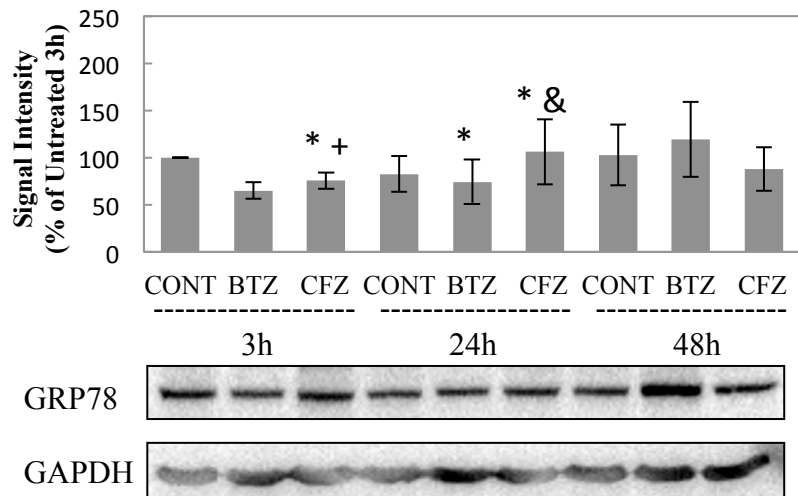

**D** GRP94 protein levels at 3h, 24h and 48h of drug treatments in BALB/3T3 fibroblasts

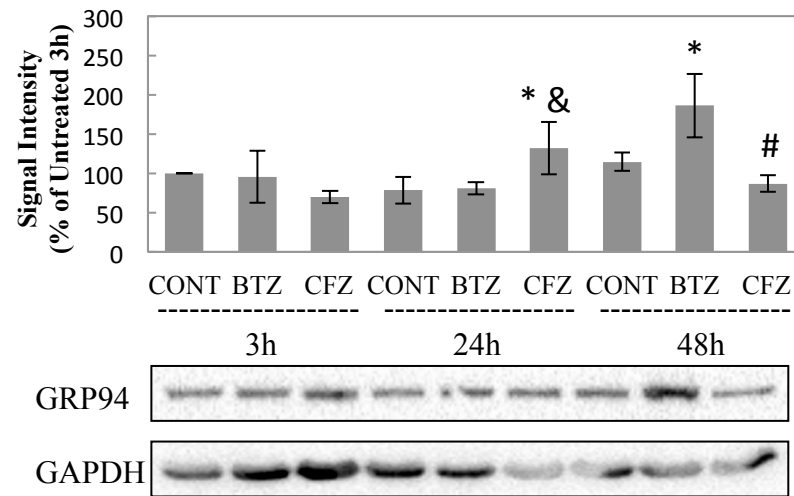



**Supplementary Figure 10:** Effects on GRP78 and GRP94 in H9c2 cardiomyoblasts and BALB/3T3 embryo fibroblasts following 3h, 24h and 48 h of 100 nM BTZ and CFZ treatments. **A.** GRP78, **B.** GRP94 expressions in H9c2 cardiomyoblasts. **C.** GRP78, **D.** GRP94 expressions in BALB/3T3 embryo fibroblasts. CONT 3h was set to 100%. Percentage of all lanes was calculated as proportioning the lane density to CONT 3h Data denote mean  $\pm$  % S.D. \*  $p < 0.05$  vs CONT group of each time point, +  $p < 0.05$  CFZ 3h vs BTZ 3h, &  $p < 0.05$  CFZ 24h vs BTZ 24h, #  $p < 0.05$  CFZ 48h vs BTZ 48h. Blot is cropped to improve the clarity. Full-length blots are included in the Supplementary Data.

**A Protein Carbonylation at 3h, 24h and 48h of drug treatments in BALB/3T3 fibroblasts**

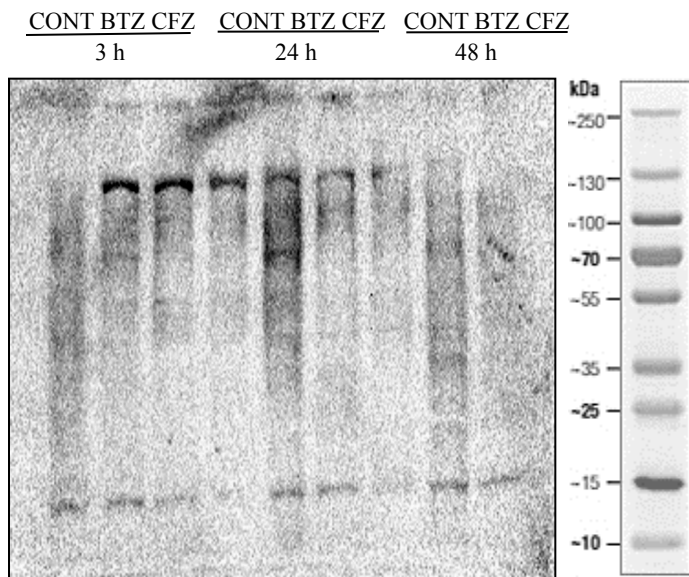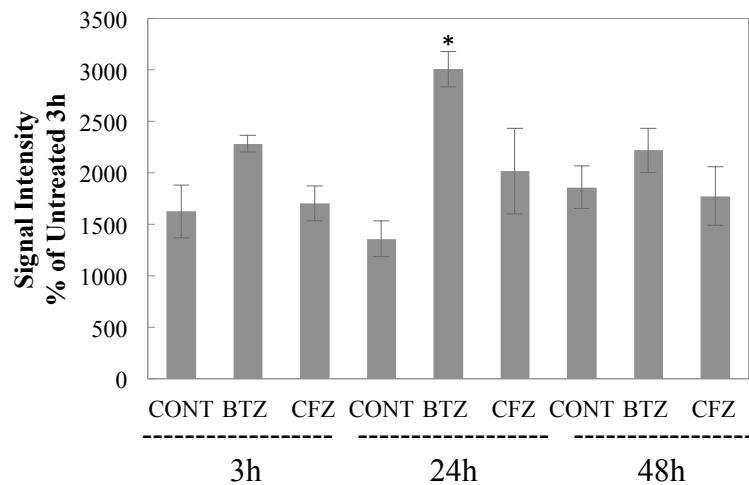

**B K48-linked ubiquitinated proteins at 3h, 24h and 48h of drug treatments in BALB/3T3 fibroblasts**

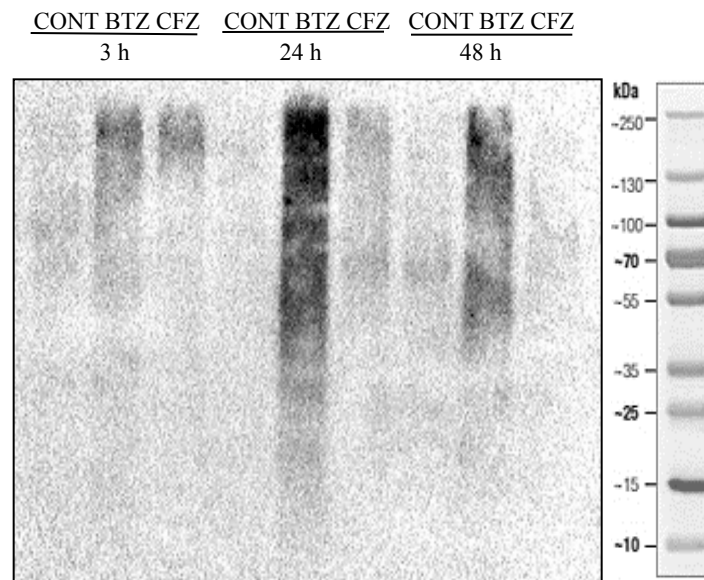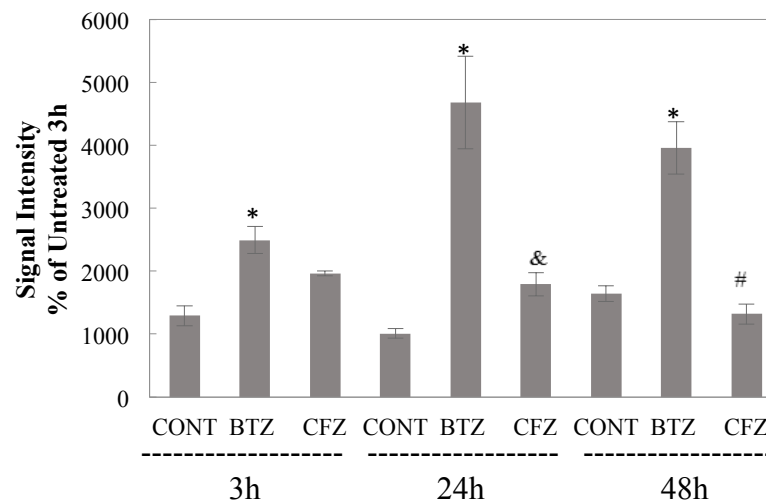

**Supplementary Figure 11:** Impact of BTZ and CFZ on protein carbonylation and accumulation of K48-linked ubiquitinated proteins in BALB/3T3 embryo fibroblasts. Cells were treated with BTZ and CFZ; cell lysates were prepared and analyzed via immunoblotting as described in methods. Blots represent one from three replicates (n=3). **A.** shows protein carbonyls following 3h, 24h and 48h treatment; **B.** shows K48-linked ubiquitinated-proteins following 3h, 24h and 48h treatment. Blot is cropped to improve the clarity. Full-length blots are included in the Supplementary Data. Data denote mean  $\pm$  % S.D. \*p < 0.05 vs. CONT group, &p < 0.05 vs. BTZ group, #p<0.05 CFZ 48h vs BTZ 48h.

**A Protein Carbonylation at 3h, 24h and 48h of drug treatments in H9c2 cardiomyoblasts**

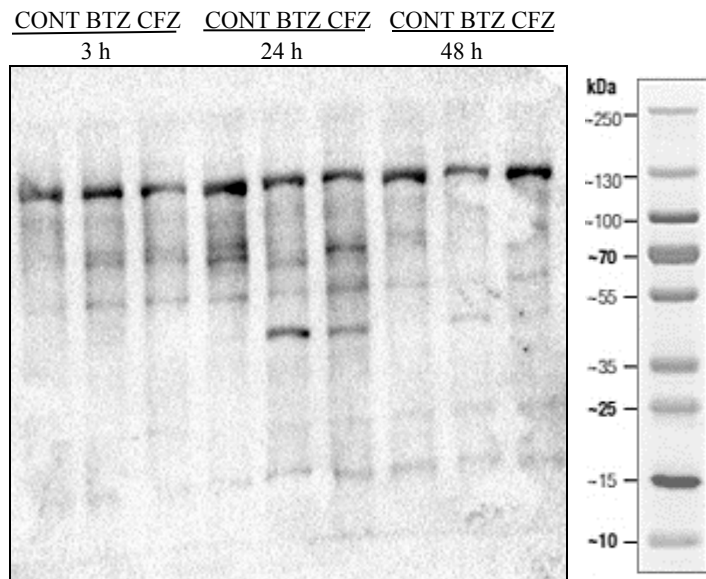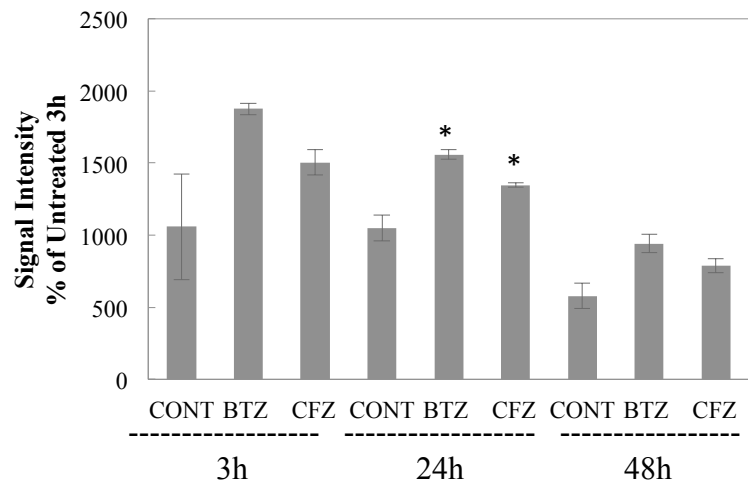

**B K48-linked ubiquitinated proteins at 3h, 24h and 48h of drug treatments in H9c2 cardiomyoblasts**

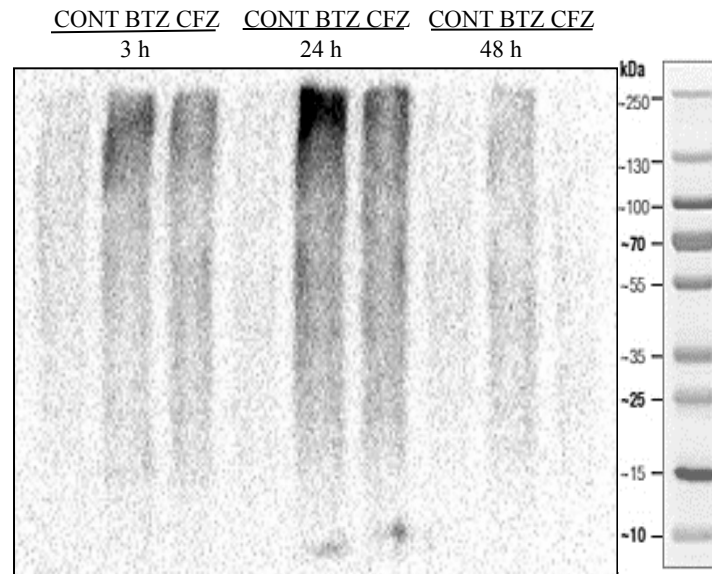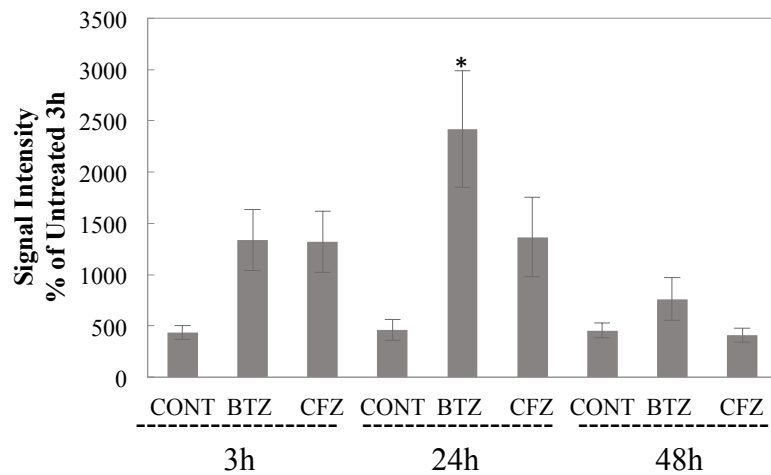

**Supplementary Figure 12:** Impact of BTZ and CFZ on protein carbonylation and accumulation of K48-linked ubiquitinated proteins in H9c2 cardiomyoblasts. Cells were treated with BTZ and CFZ; cell lysates were prepared and analyzed via immunoblotting as described in methods. Blots represent one from three replicates (n=3). **A.** shows protein carbonyls following 3h, 24h and 48h treatment; **B.** shows K48-linked ubiquitinated-proteins following 3h, 24h and 48h treatment. Blot is cropped to improve the clarity. Full-length blots are included in the Supplementary Data. Data denote mean  $\pm$  % S.D. \*p < 0.05 vs. CONT group.

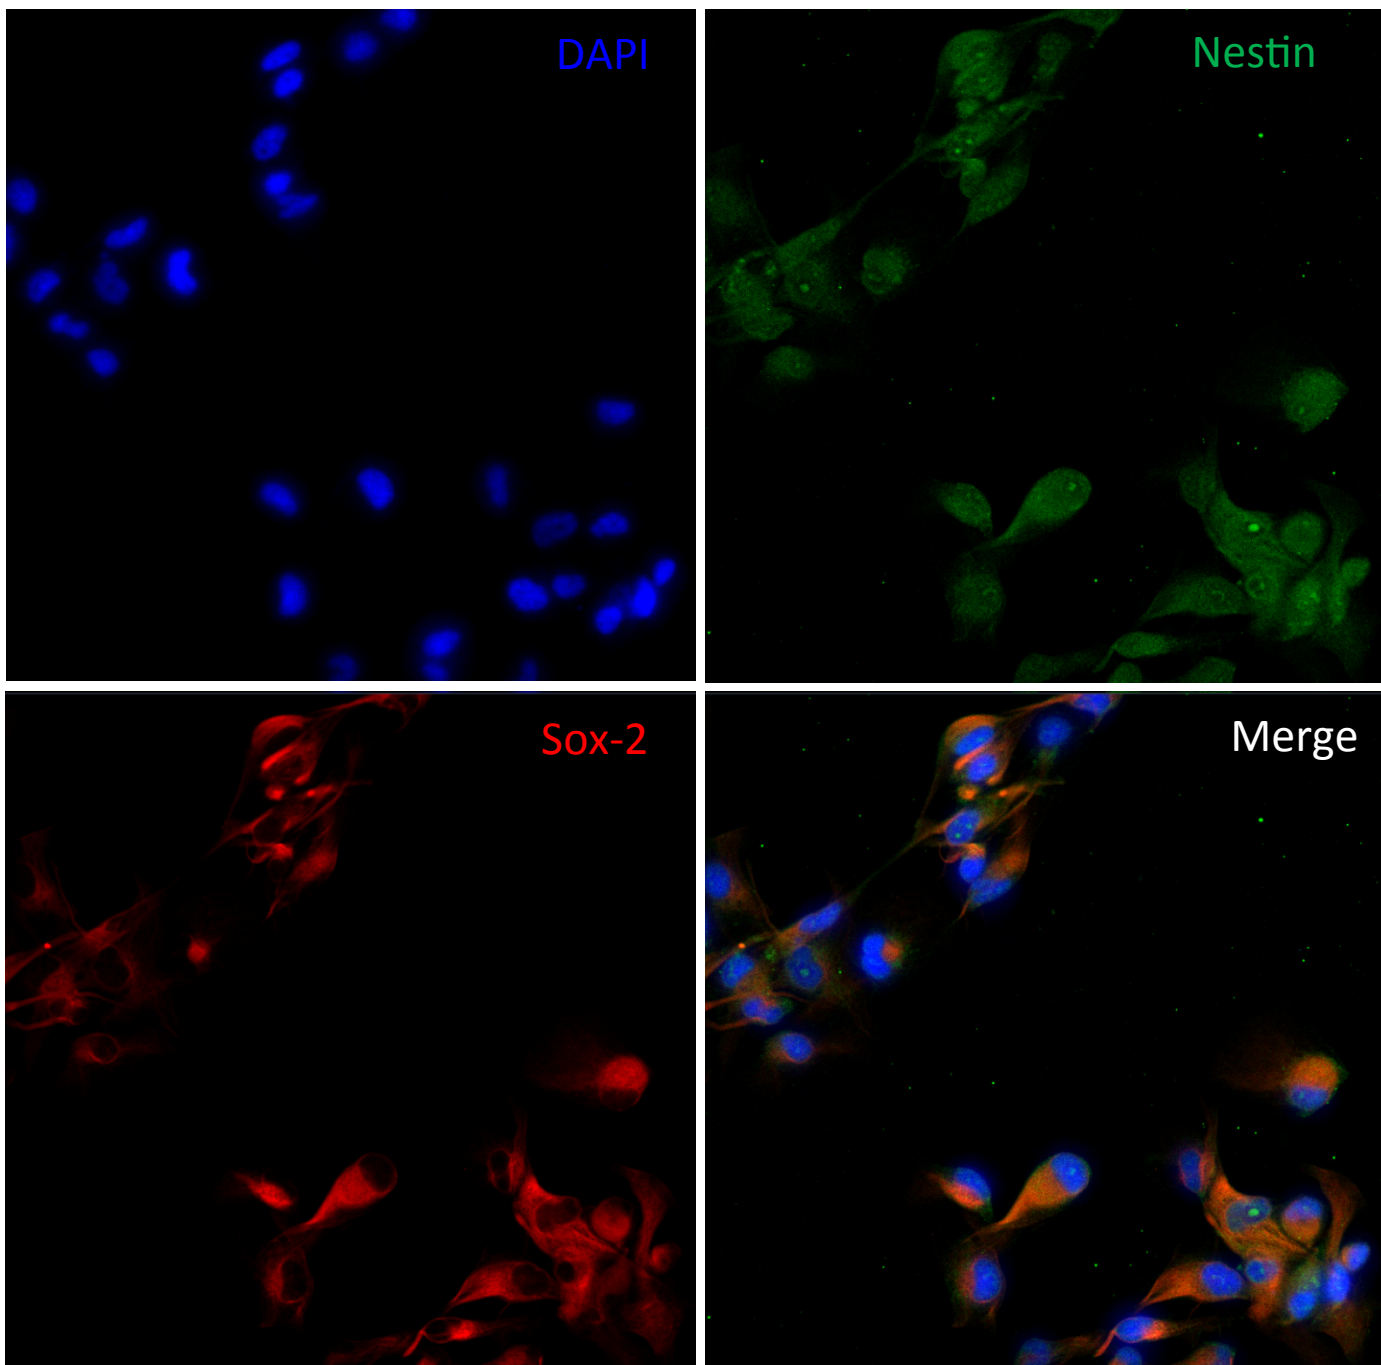

**Supplementary Figure 13:** Characterization of NSCs in the presence of EGF and FGF-2. Images represent one of the replicate from three replicates (n=3).

# Uncropped blots for the western blots

NSCs

Uncropped blot for Nestin (Figure 3A and Figure S3A)

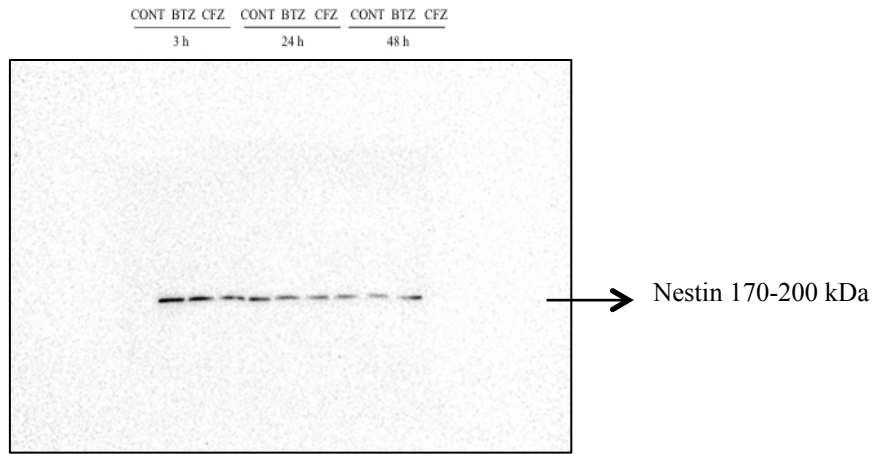

Abcam Rat Anti-Nestin antibody (clone ab6142)

Uncropped blot for GAPDH (Figure 3A, Figure S3A, Figure 3C, Figure S4A)

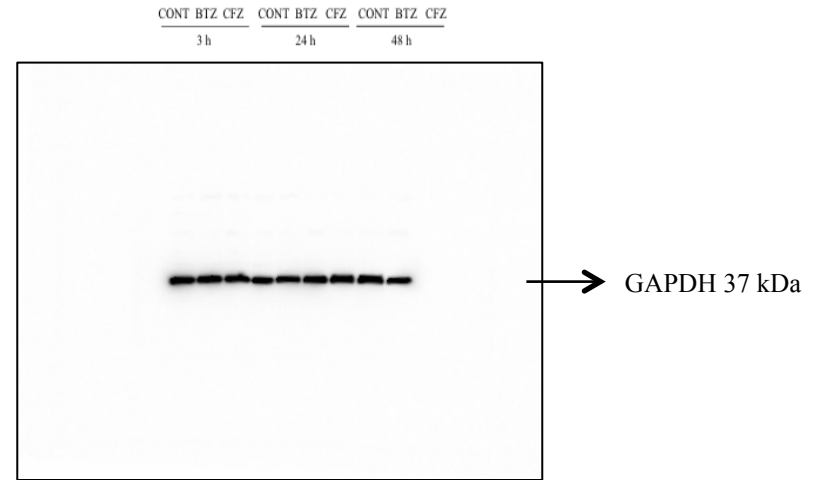

Abcam Anti-GAPDH antibody (clone 8245)

Uncropped blot for ARP2 (Figure 3C, Figure S4A)

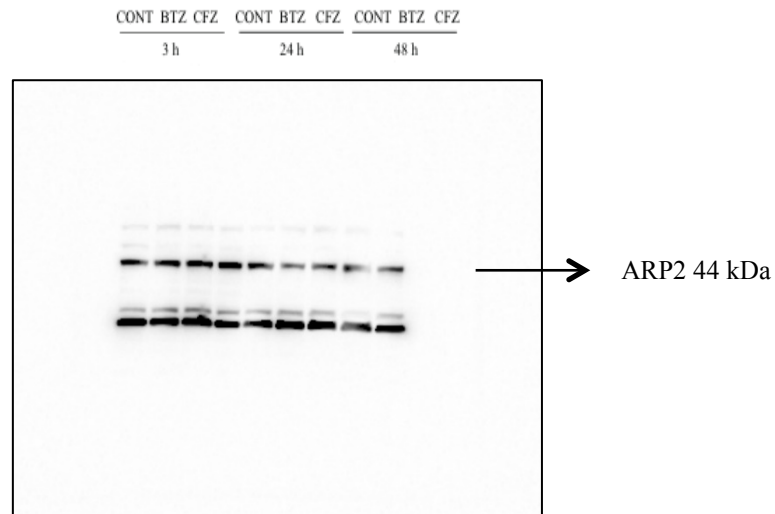

CST Anti-ARP2 antibody (clone D85D5)

Membrane for Nesitn, ARP2 and GAPDH (Figure 3A, Figure S3A, Figure 3C, Figure S4A)

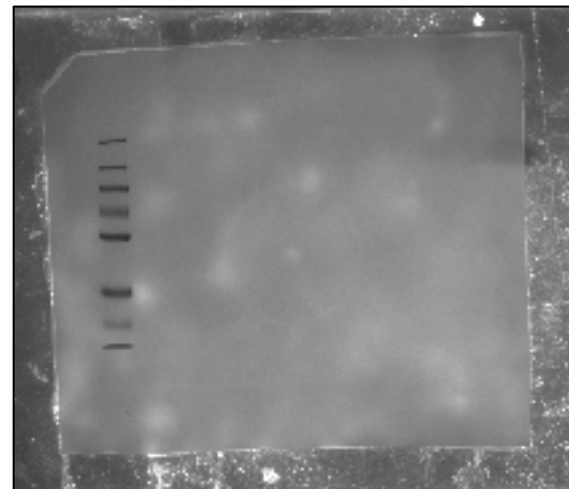



Uncropped blot for Vimentin (Figure 3B, Figure S3B)

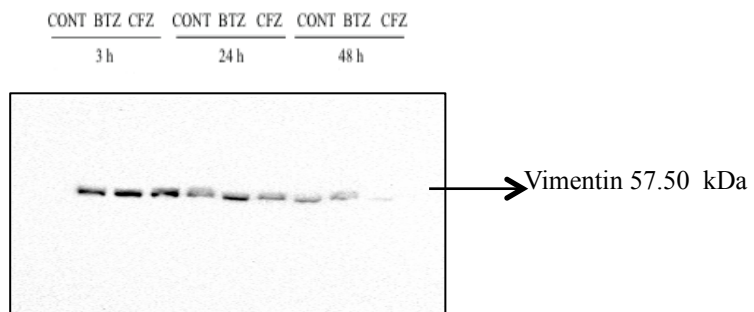

CST Anti-Vimentin Antibody (clone 3932)

Uncropped blot for GAPDH (Figure 3B, Figure S3B)

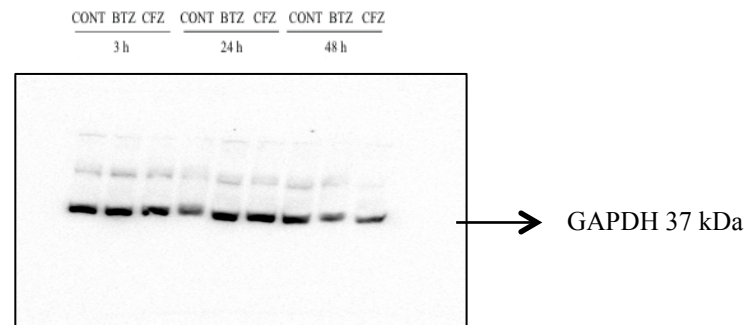

Abcam Anti-GAPDH antibody (clone 8245)

Membrane for Vimentin (Figure 3B, Figure S3B)

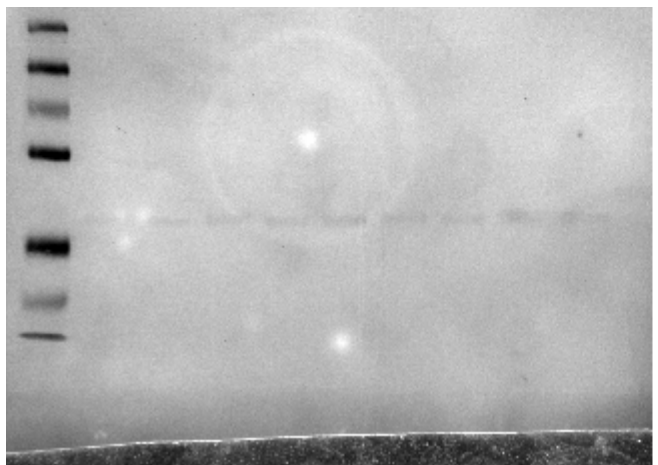

Uncropped blot for Coronin 1C (Figure 3E, Figure S4C)

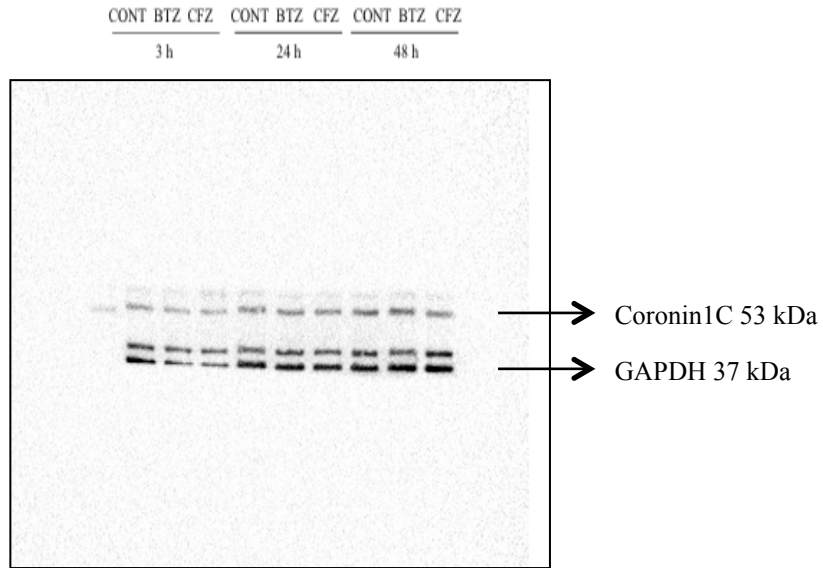

Abcam Anti-Coronin 1C Antibody (clone ab153954)

Uncropped blot for GAPDH (Figure 3E, Figure S4C)

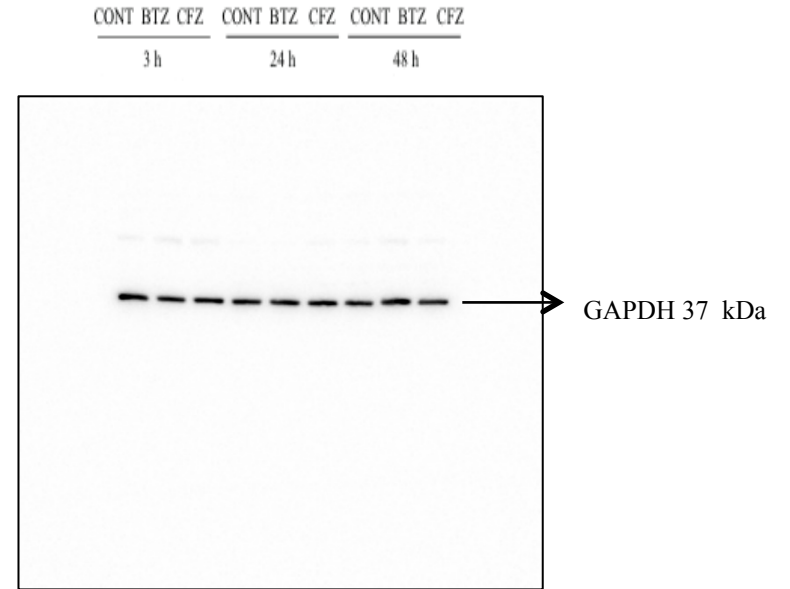

Abcam Anti-GAPDH antibody (clone 8245)

Membranes for Coronin 1C and GAPDH (Figure 3E, Figure S4C)

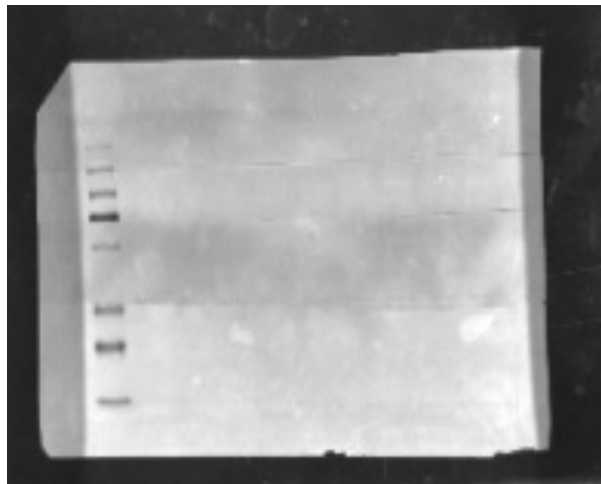

Uncropped blot for Transgelin-2 (Figure 3D, Figure S4B)

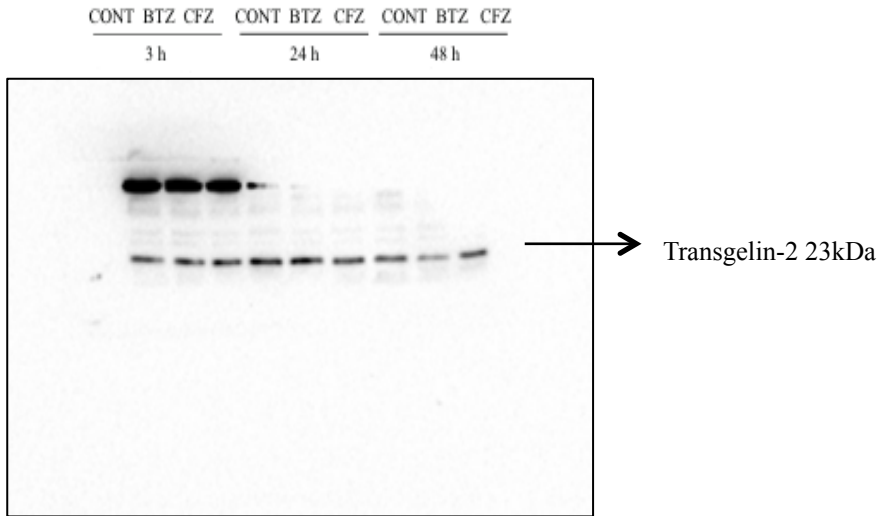

Abcam Anti-SM22 antibody (Anti-Transgelin-2)  
(clone ab184522)

Uncropped blot for GAPDH (Figure 3D, Figure S4B)

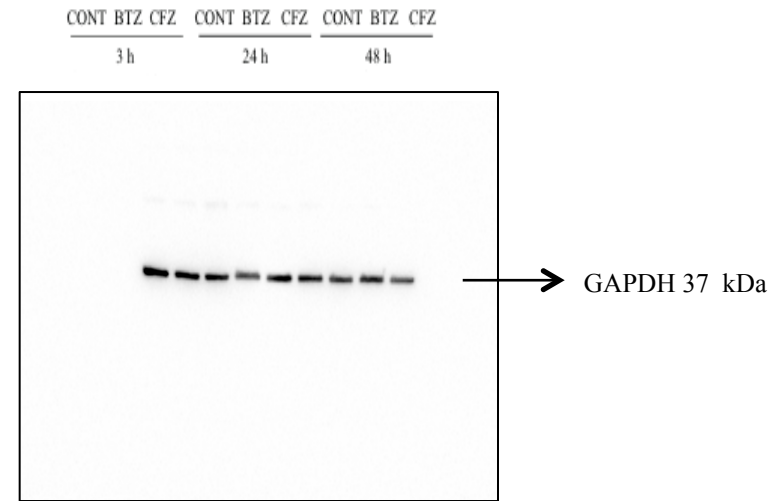

Abcam Anti-GAPDH antibody (clone 8245)

Membranes for Transgelin-2 and GAPDH (Figure 3D, Figure S4B)

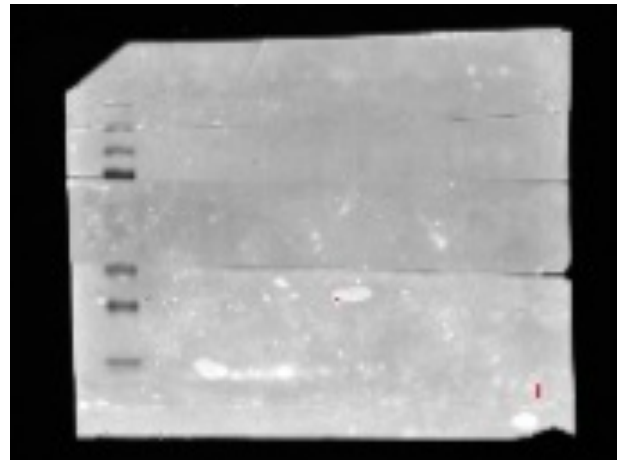

Uncropped blot for HSP32 (Figure 4A, Figure S5B)

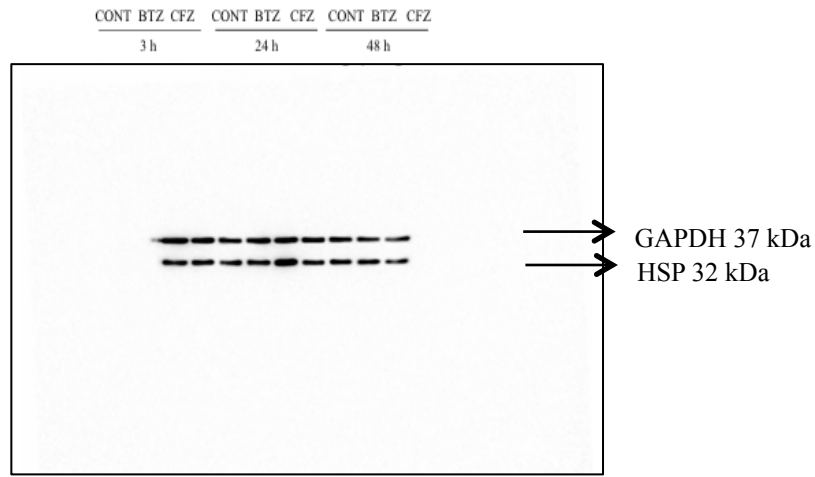

Enzo Anti-HO-1 (HO-1-1, anti-HP32)

Uncropped blot for HSP47 and GAPDH (Figure 4B, Figure S5D)

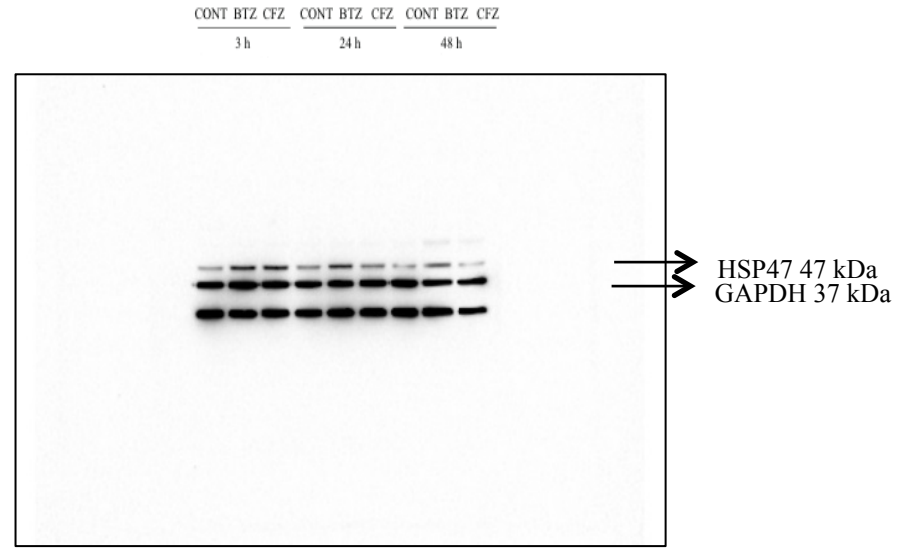

Abcam Anti-HSP47 Antibody (clone ab77609)

Membrane for HSP47, HSP32 and GAPDH (Figure 4A, Figure 4B, Figure S5B, Figure S5D)

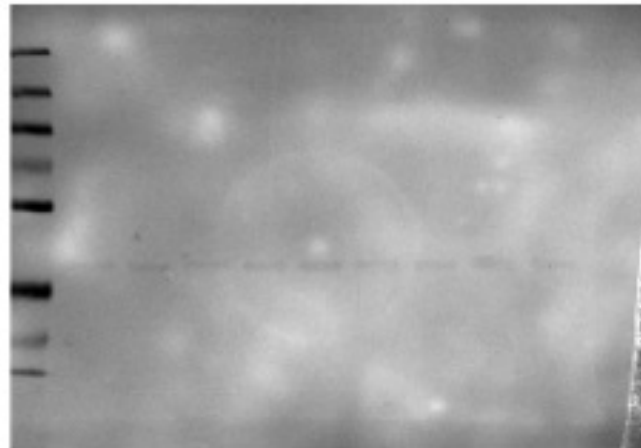

Uncropped blot for HSP70 (Figure 4C, Figure S5F)

CONT BTZ CFZ    CONT BTZ CFZ    CONT BTZ CFZ  
3 h            24 h            48 h

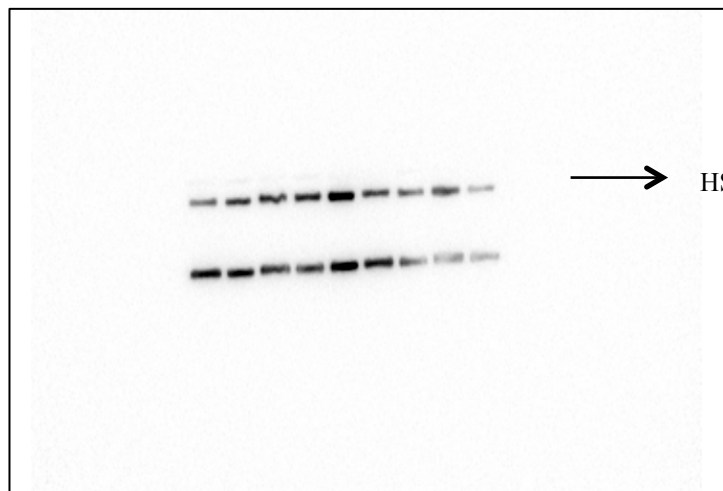

HSP70 70 kDa

CST Anti-HSP70 Antibody (clone D69)

Uncropped blot for GAPDH (Figure 4C, Figure S5F and Figure S5G)

CONT BTZ CFZ    CONT BTZ CFZ    CONT BTZ CFZ  
3 h            24 h            48 h

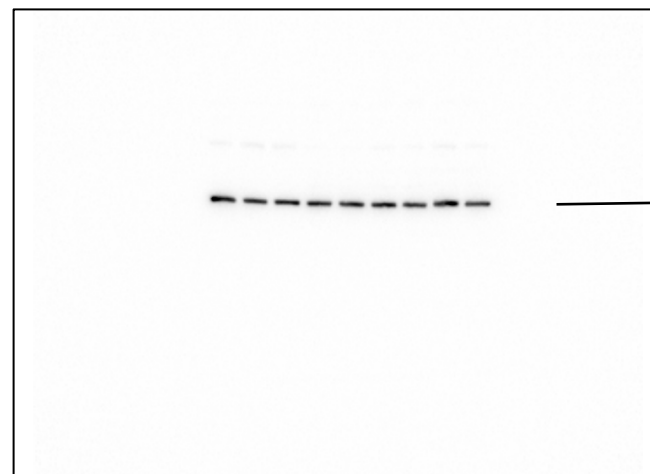

GAPDH 37 kDa

Abcam Anti-GAPDH antibody (clone 8245)

Uncropped blot for HSP90 (Figure S5G)

CONT BTZ CFZ    CONT BTZ CFZ    CONT BTZ CFZ  
3 h            24 h            48 h

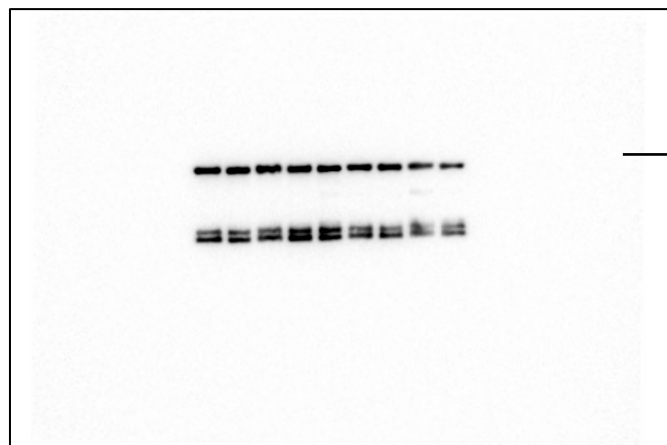

HSP90 90 kDa

CST Anti-HSP90 Antibody (clone C45G5)

Membrane for HSP70, HSP90 and GAPDH (Figure 4C, Figure S5F and Figure S5G)

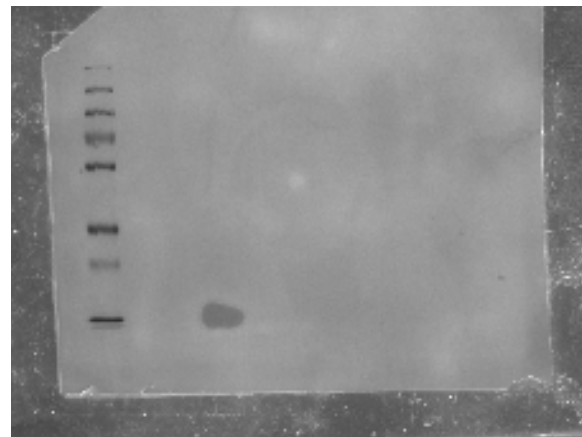

Uncropped blot for GRP94 and GRP78 (Figure 4D and Figure 4E)

CONT BTZ CFZ      CONT BTZ CFZ  
24 h                      24 h

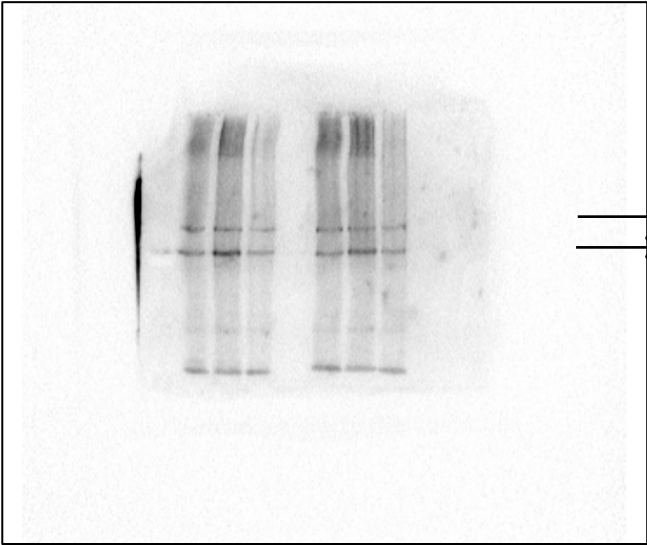

GRP94 94 kDa  
GRP94 78 kDa

CST Anti-Grp94 Antibody (clone 2104)  
CST Anti-BiP Antibody (clone C50B12)

Membrane for GRP94 and GRP78 (Figure 4D, Figure 4E)

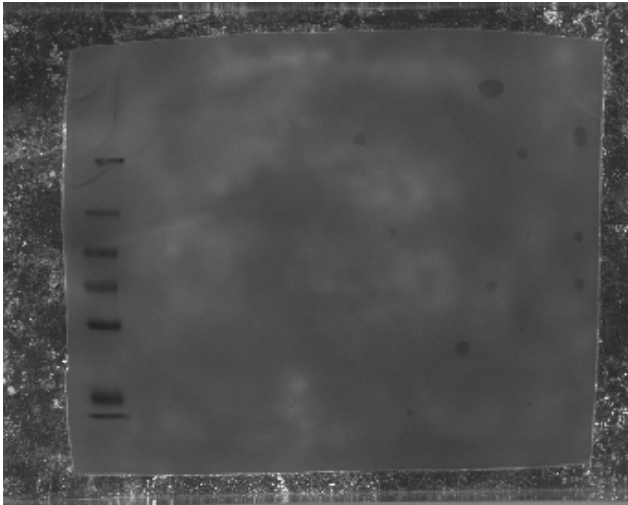

Uncropped blot for Co-precipitated B-actin by HSP70 (Figure 5A)

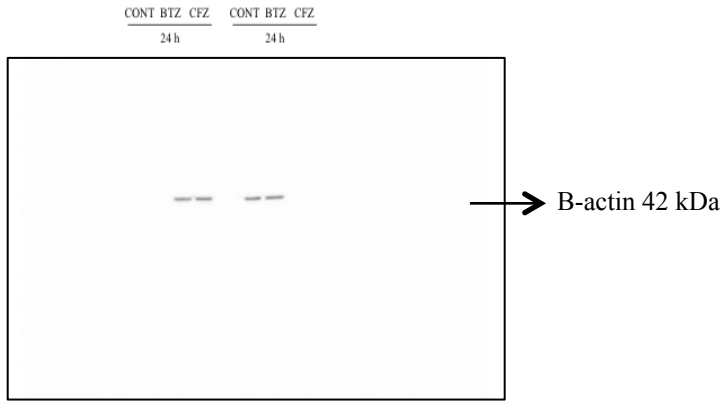

Abcam Anti-beta Actin Antibody (clone ab8227)

Membrane for B-actin (Figure 5A)

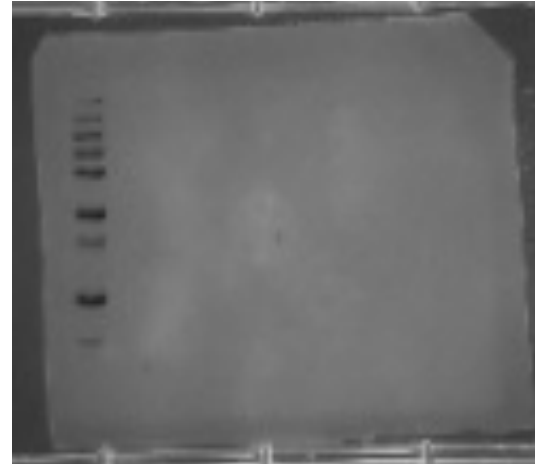

Uncropped blot for Co-precipitated HSP70 by B-actin (Figure 5B)

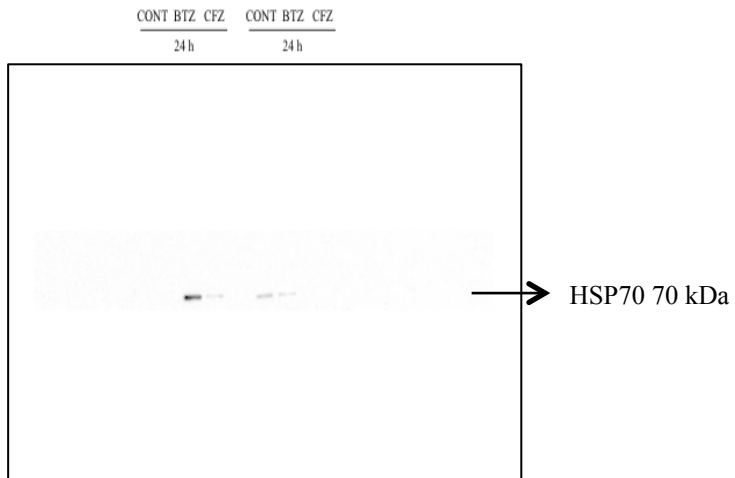

Thermo Scientific Inc. Anti-HSP70 Antibody (clone 5A5)

Membrane for HSP70 (Figure 5B)

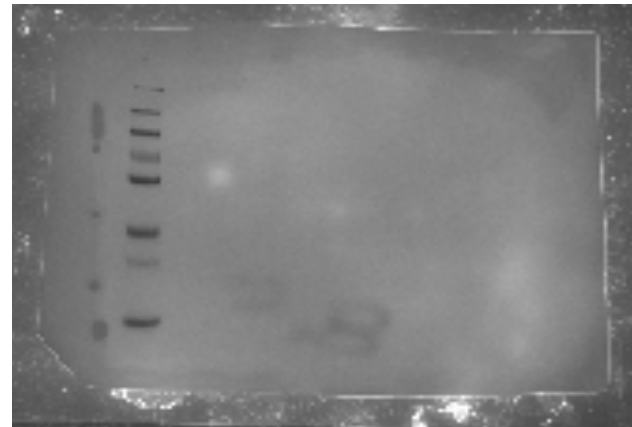

Uncropped blot for Precipitation Control (Figure 5A and Figure 5B)

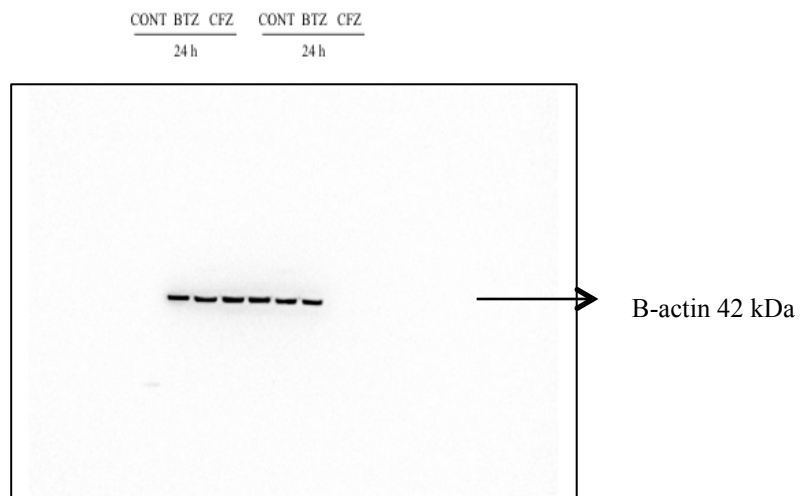

Abcam Anti-beta Actin Antibody (clone ab8227)

Uncropped blot for Precipitation Control (Figure 5A and Figure 5B)

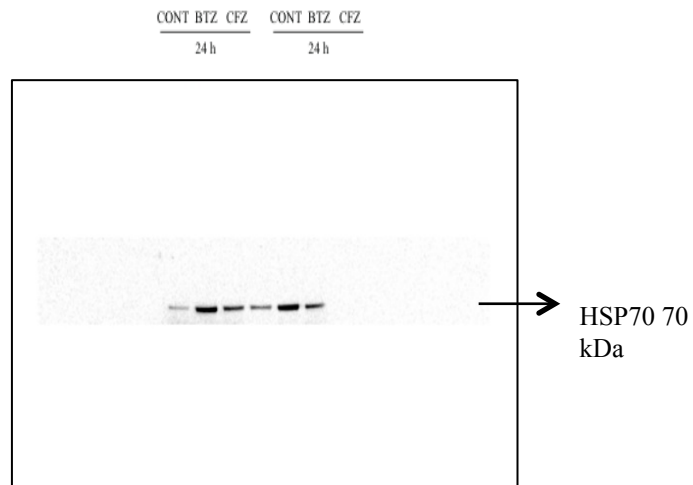

Thermo Scientific Inc. Anti-HSP70 Antibody (clone 5A5)

Membrane for Precipitation Controls (Figure 5A and Figure 5B)

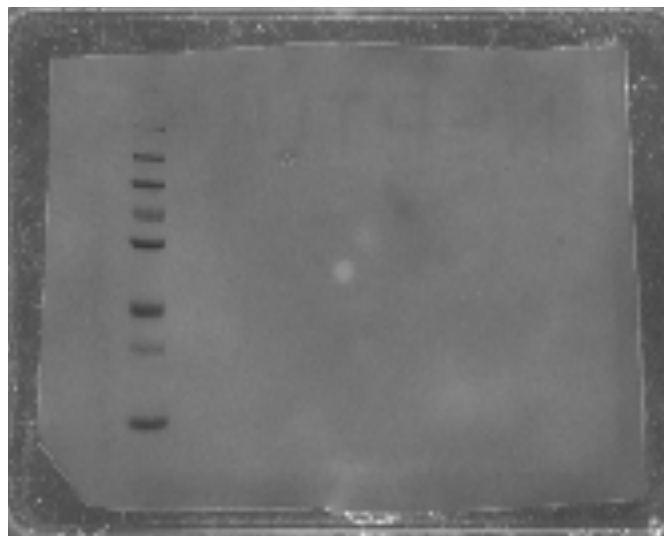



Membrane for K48-linked ubiquitinated proteins (Figure 6B)

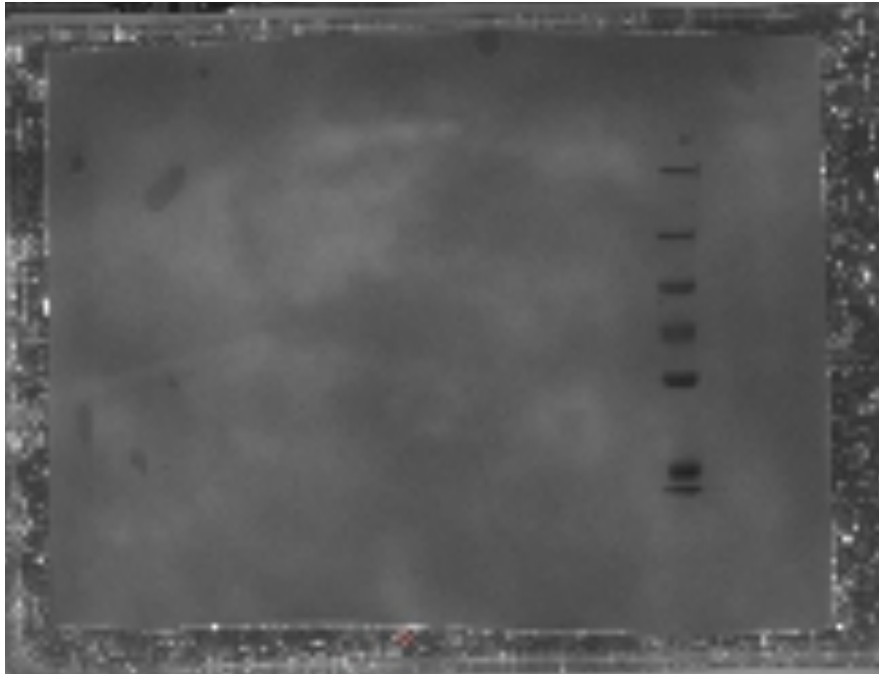

Membrane for Protein Carbonylation (Figure 6A)

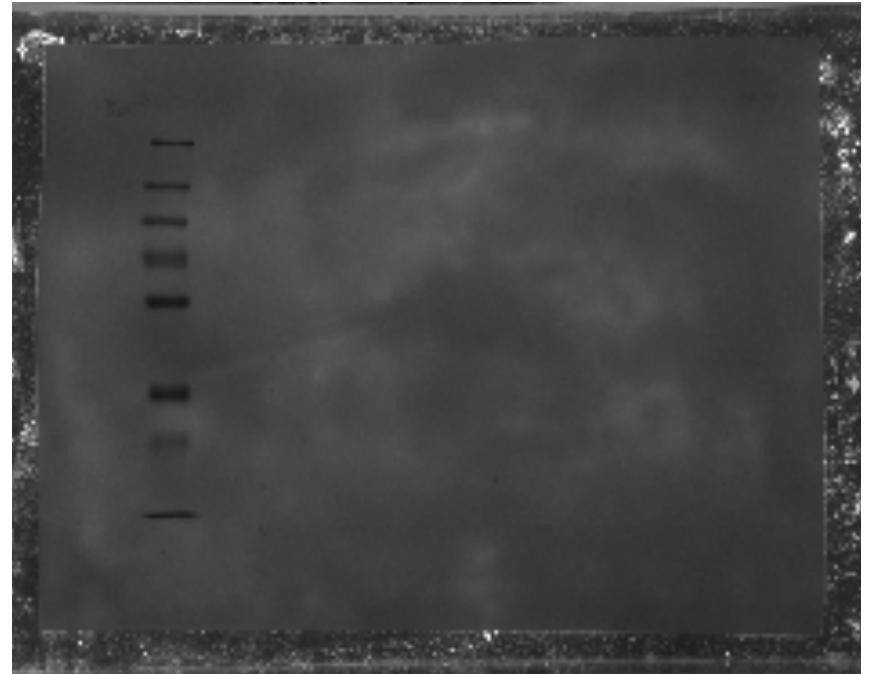

Uncropped blot for HSP27 (Figure S5A)

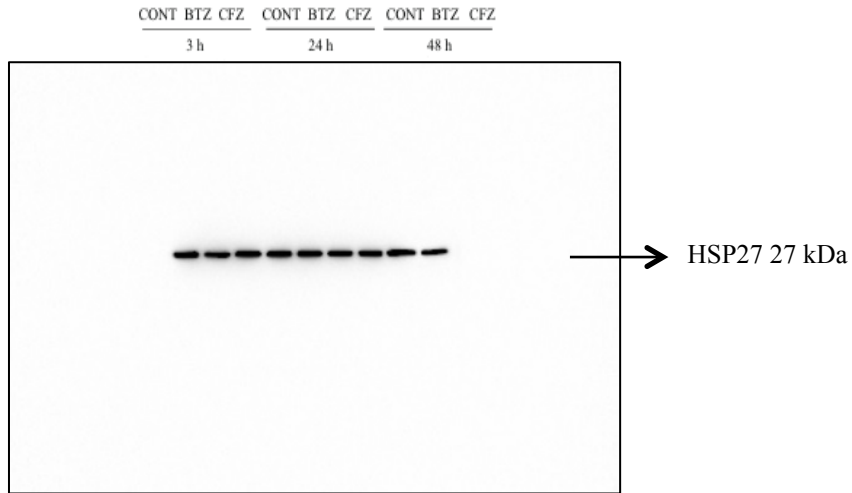

CST Anti-HSP27 Antibody (clone G31)

Uncropped blot for HSP60 and GAPDH (Figure S5C)

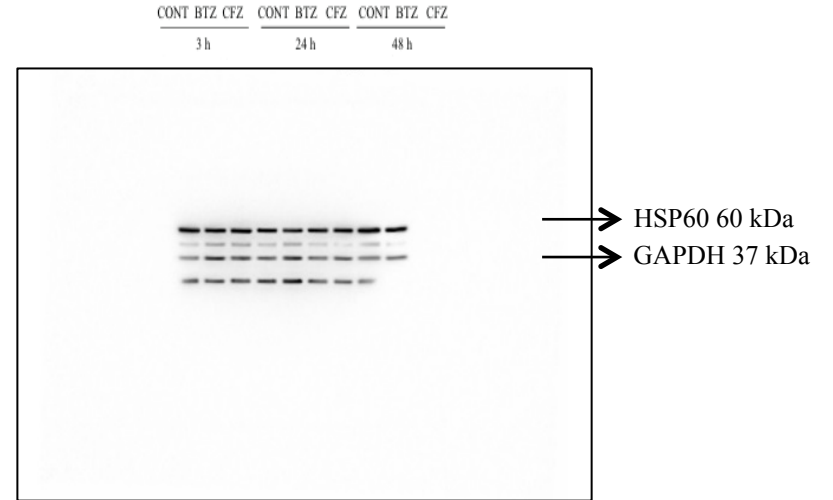

CST Anti-HSP60 Antibody (clone D307)

Membrane for HSP27, HSP60 and GAPDH (Figure S5A and Figure S5C)

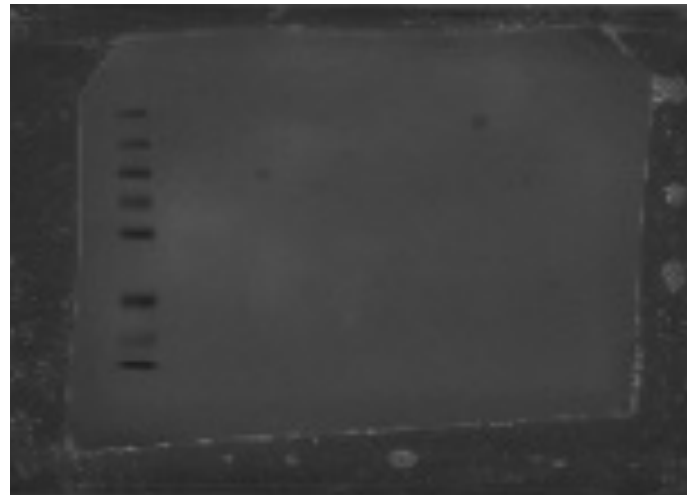

Uncropped blot for HSP40 (Figure S5C)

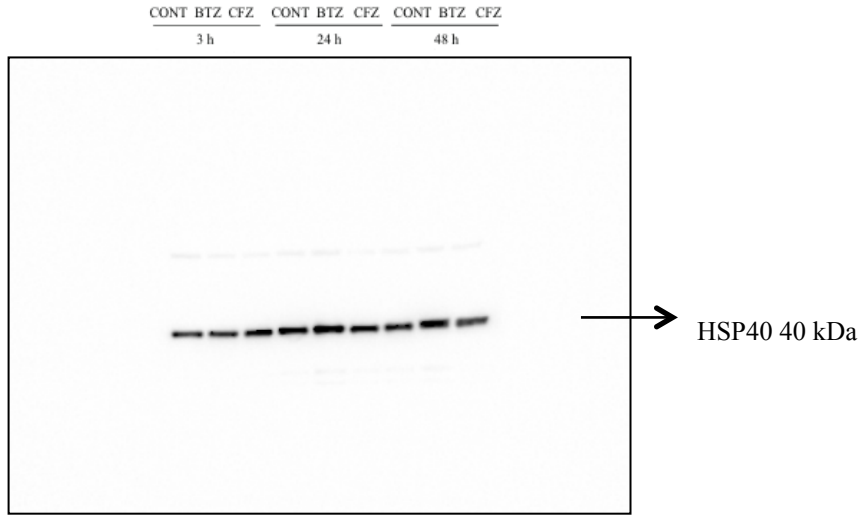

CST Anti-HSP40 Antibody (clone C64B4)

Uncropped blot for GAPDH (Figure 5SC)

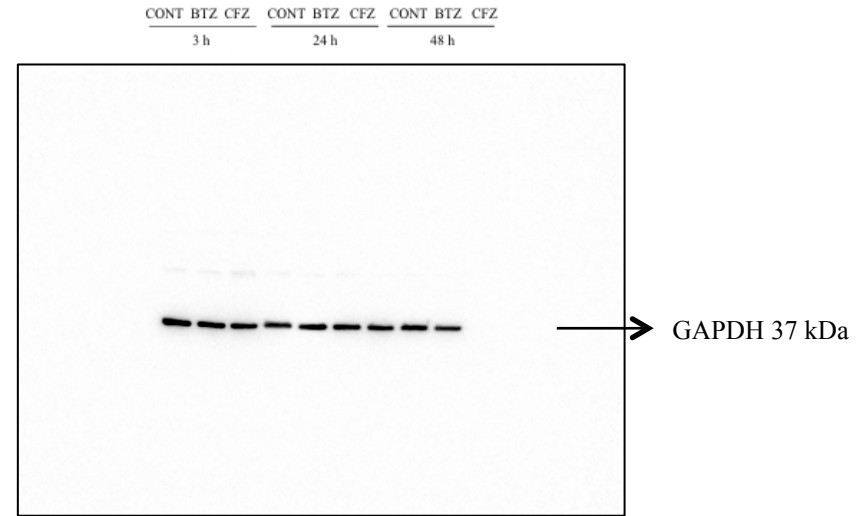

Abcam Anti-GAPDH antibody (clone 8245)

Membrane for HSP40 and GAPDH (S5C)

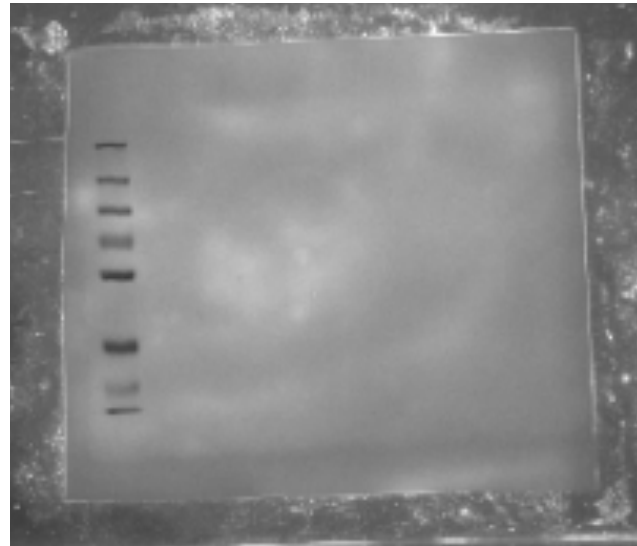

# **H9c2 CARDIOMYOCYTES**

Uncropped blot for Nestin (Figure S7A)

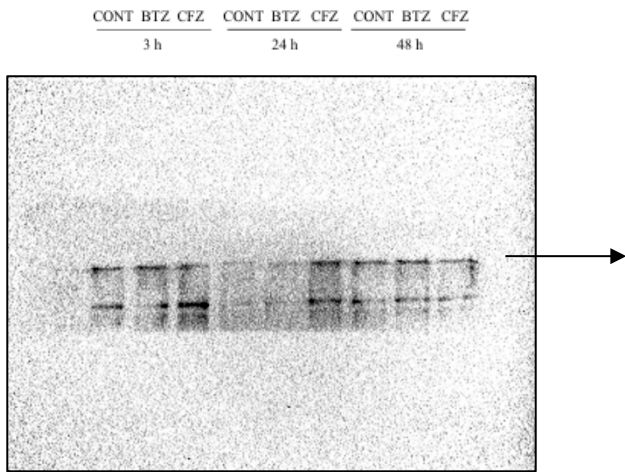

Uncropped blot for Vimentin (Figure S7B)

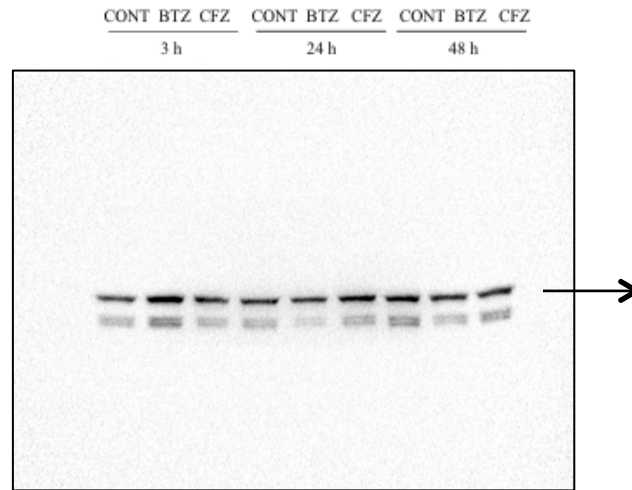

Uncropped blot for Transgelin-2 (Figure S8B)

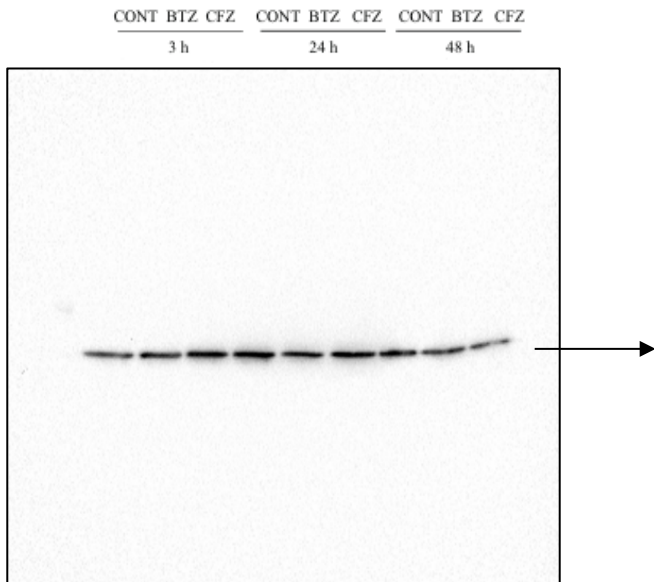

Uncropped blot for Coronin 1C (Figure S8C)

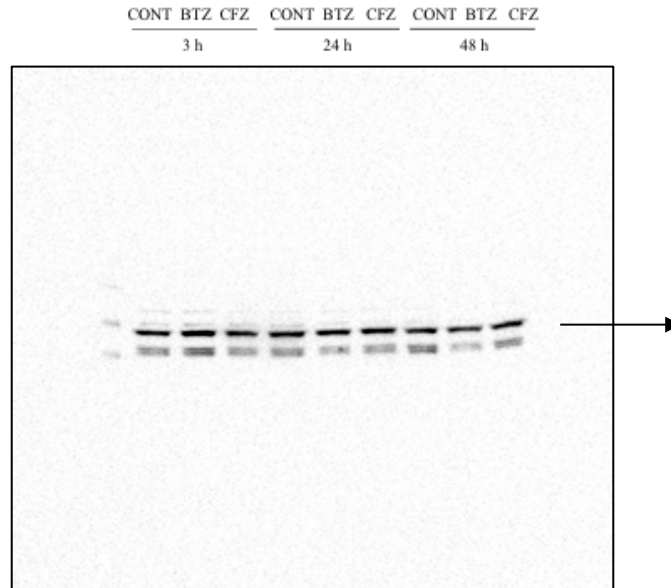

Uncropped blot for HSP32 (Figure S9A)

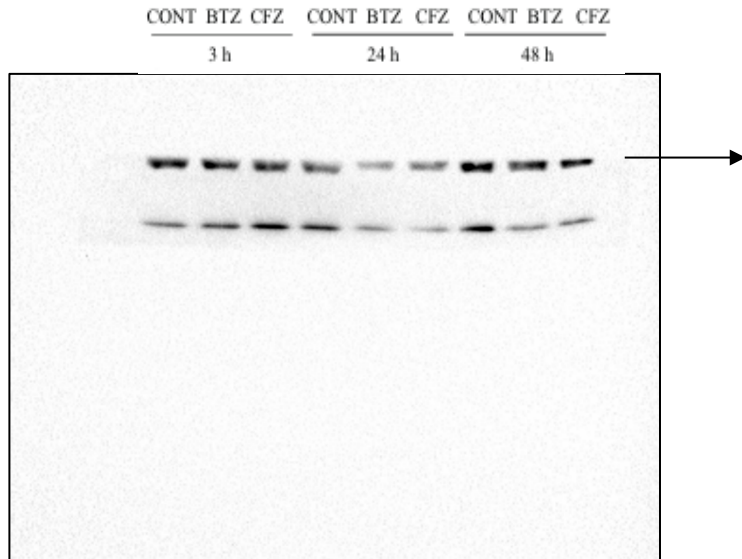

Uncropped blot for GAPDH (Figure S7A, S7B, S8B, S8C and S9A)

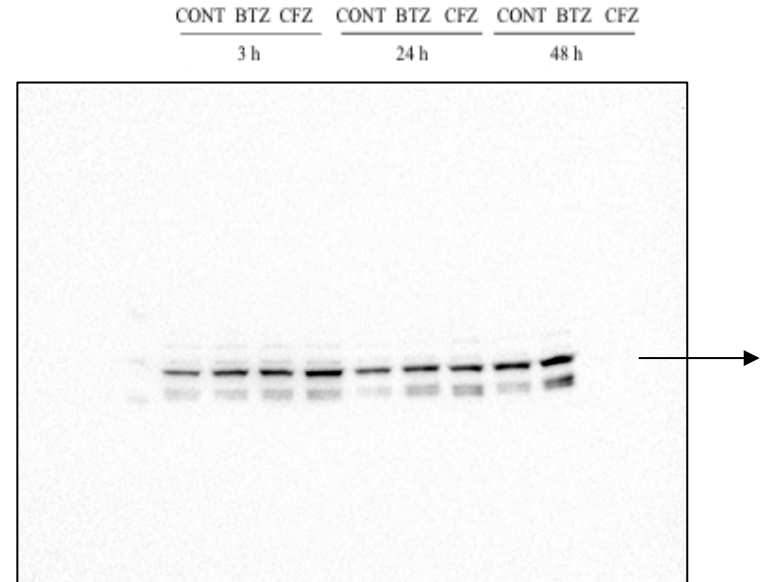

Membrane for Nestin, Vimentin, Transgelin-2, Coronin 1C, HSP32 and GAPDH (Figure S7A, S7B, S8B, S8C and S9A)

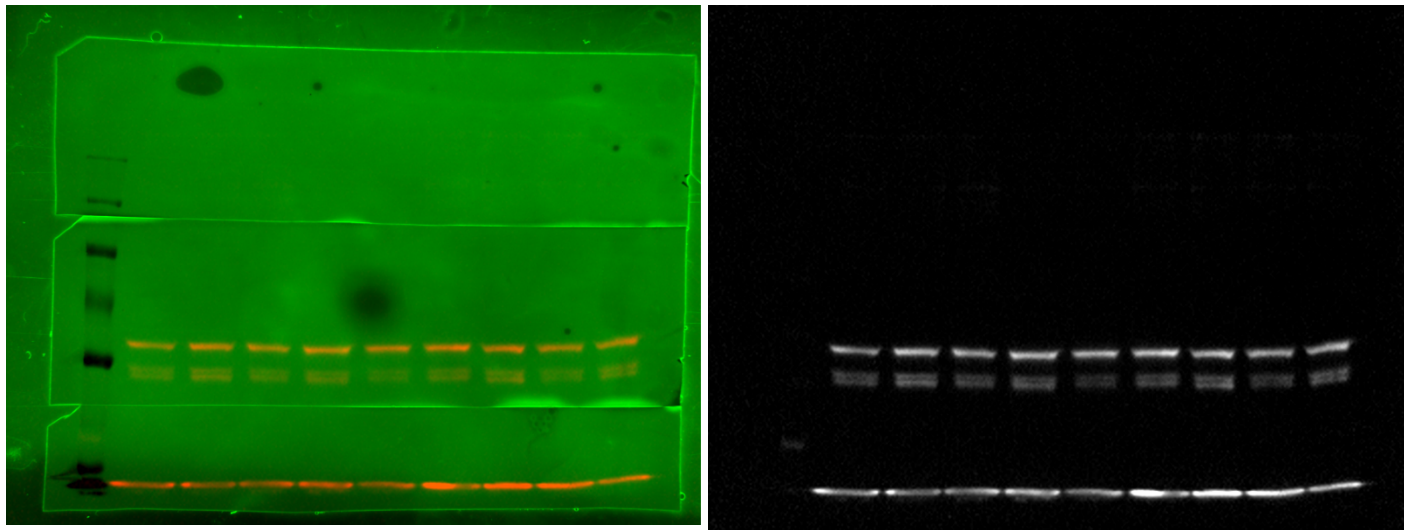

Uncropped blot for ARP2 (Figure S8A)

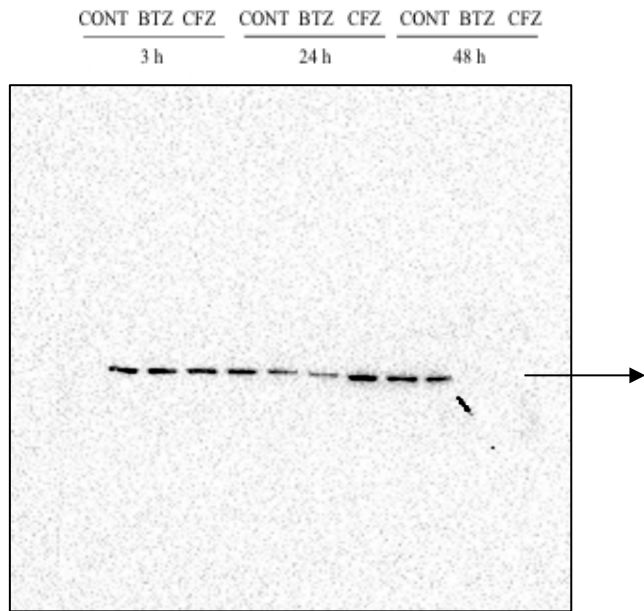

Uncropped blot for GRP94 (Figure S10B)

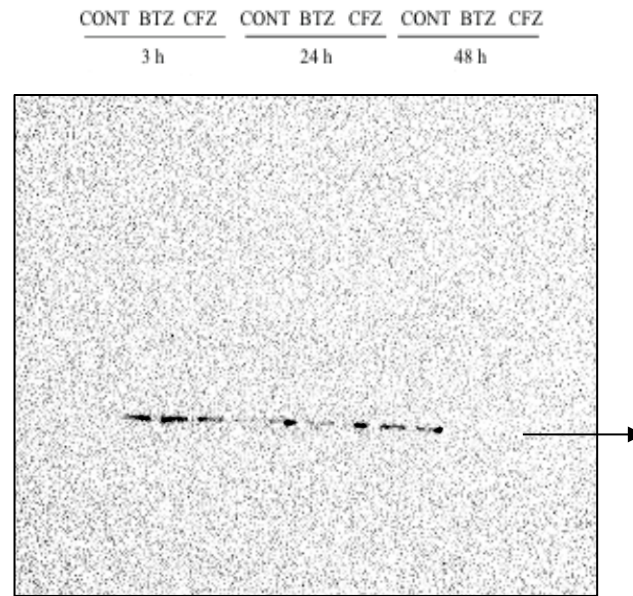

Uncropped blot for GAPDH (Figure S8A and S10B)

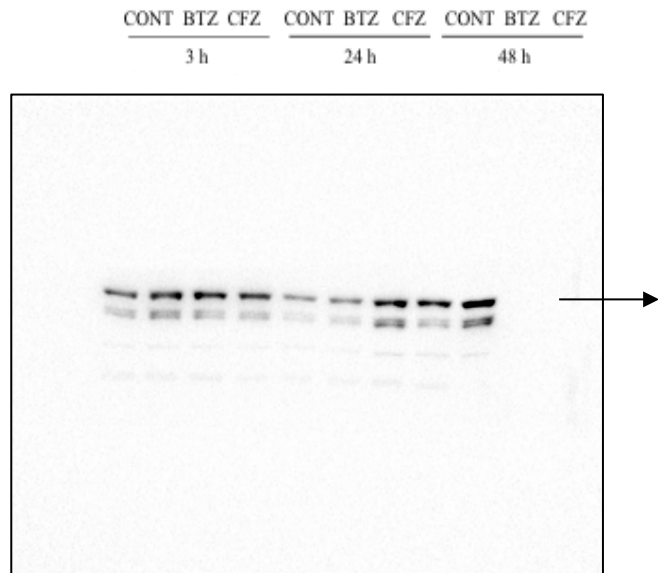

Membrane for ARP2, GRP94 and GAPDH (Figure S8A, S10B)

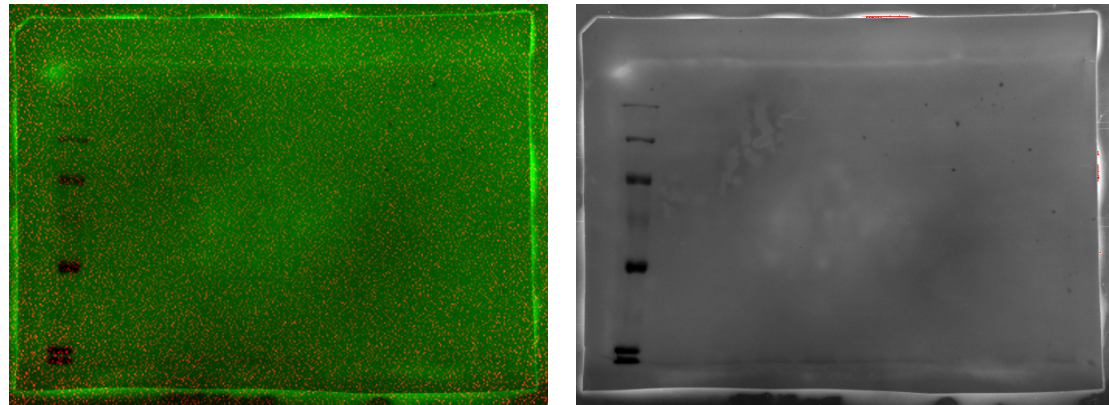

Uncropped blot for HSP47 (Figure S9B)

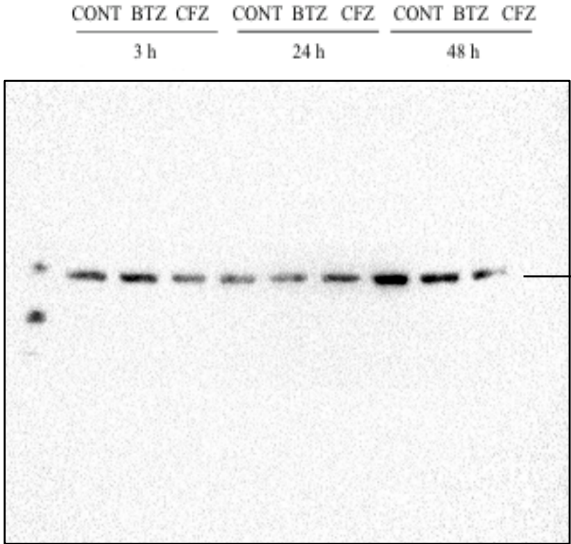

Uncropped blot for HSP70 (Figure S9E)

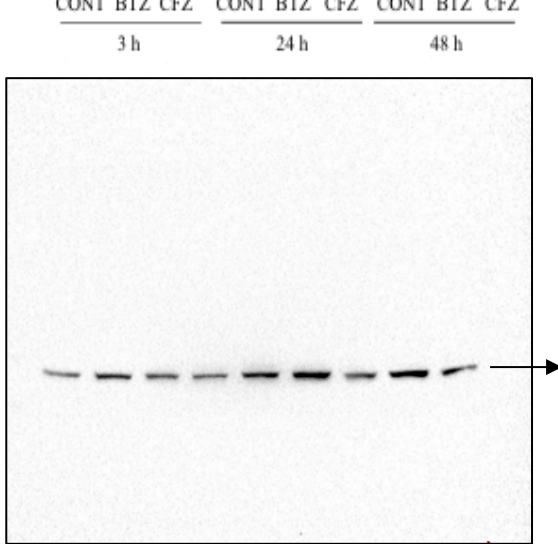

Uncropped blot for GRP78 (Figure S10A)

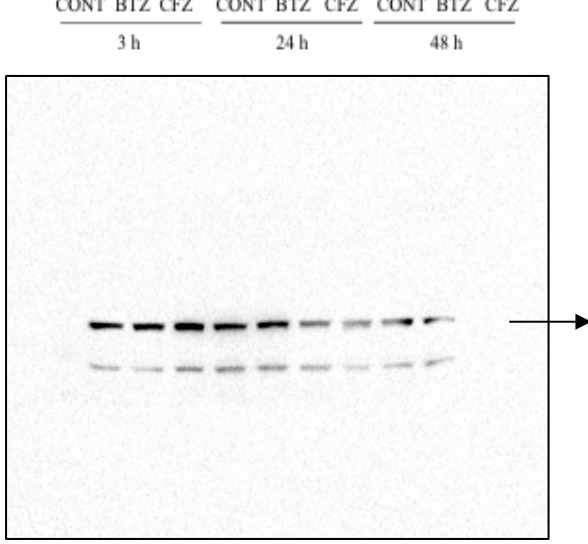

Uncropped blot for GAPDH (Figure S9B, S9E and S10A)

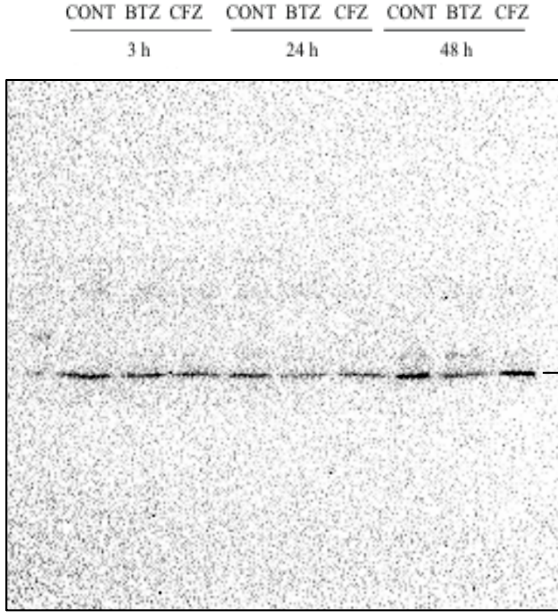

Uncropped Membrane for HSP47, HSP 70, GRP 78 and GAPDH (Figure S9B, S9E and S10A)

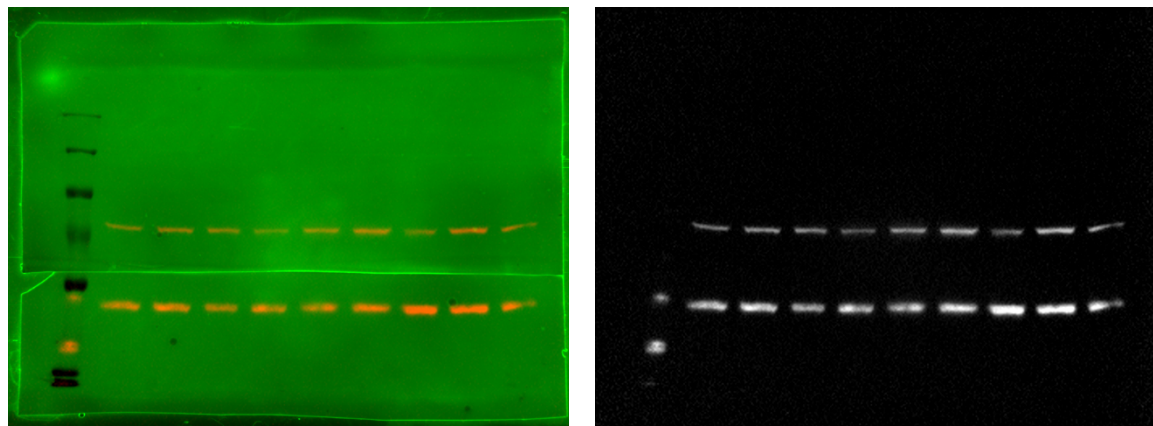



Uncropped blot for Protein Carbonylation (Figure S12A)

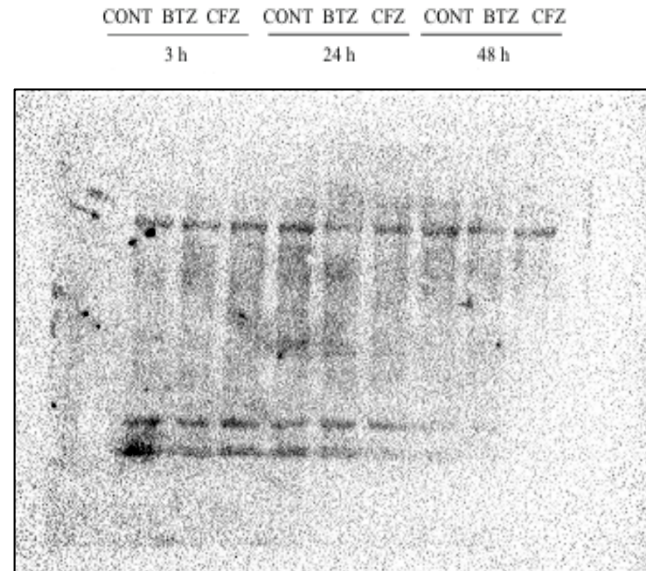

Membrane for Protein Carbonylation (Figure S12A)

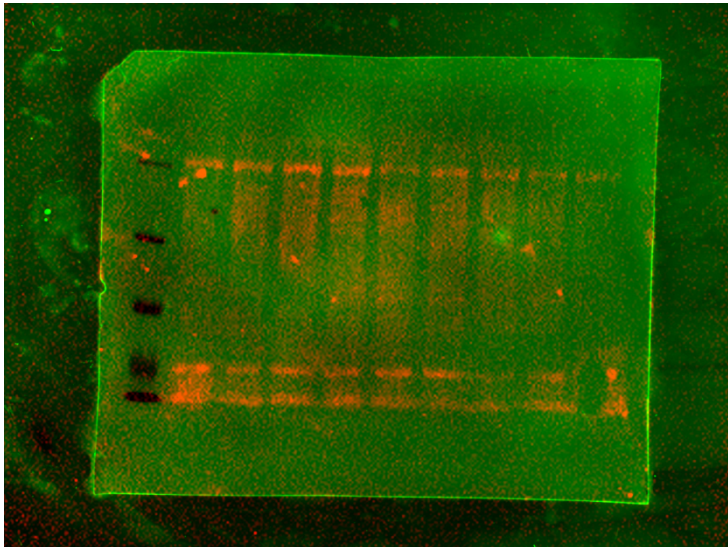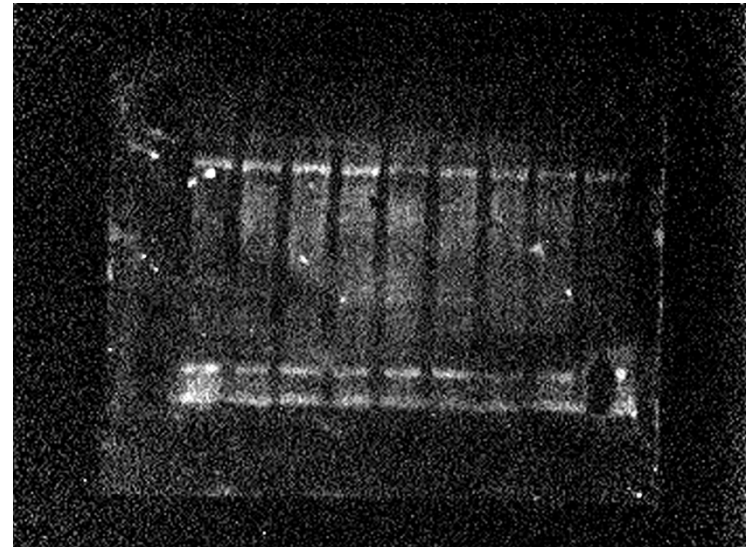

Uncropped blot for K48-linked ubiquitinated proteins (Figure S12B)

CONT BTZ CFZ    CONT BTZ CFZ    CONT BTZ CFZ  
3 h                    24 h                    48 h

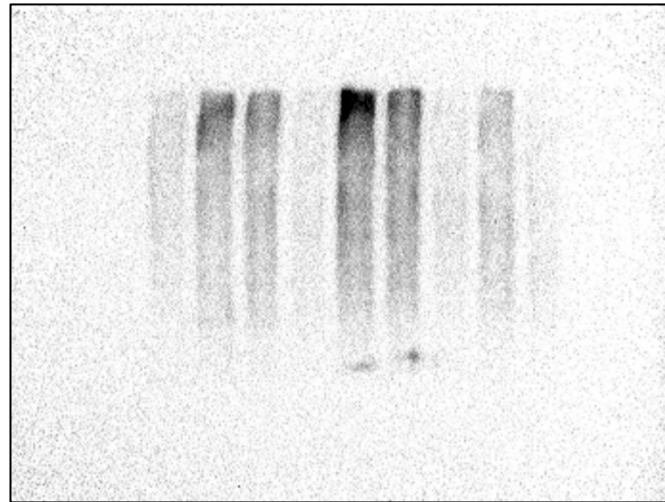

Membrane for K48-linked ubiquitinated proteins (Figure S12B)

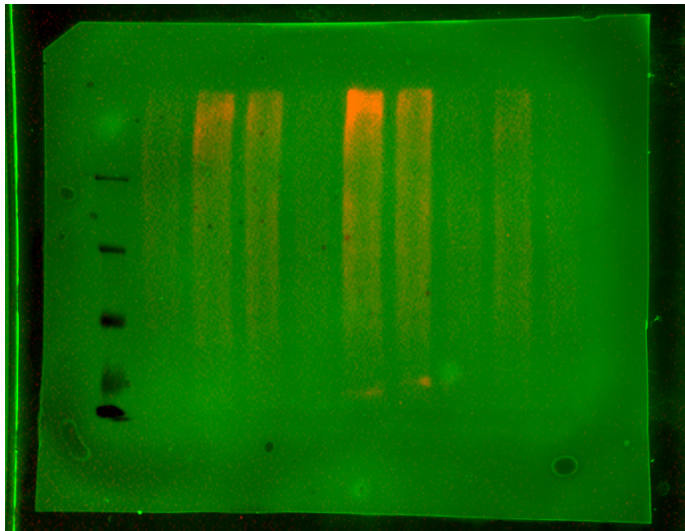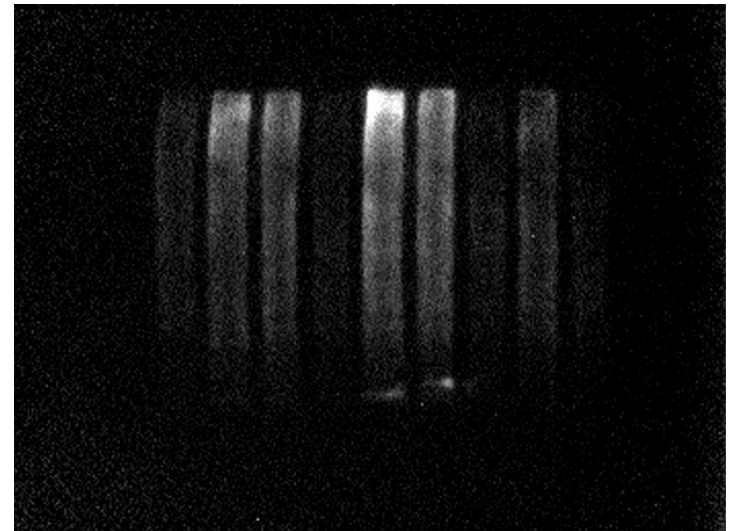

**BALB/3T3 Cells**

Uncropped blot for Nestin (Figure S7C)

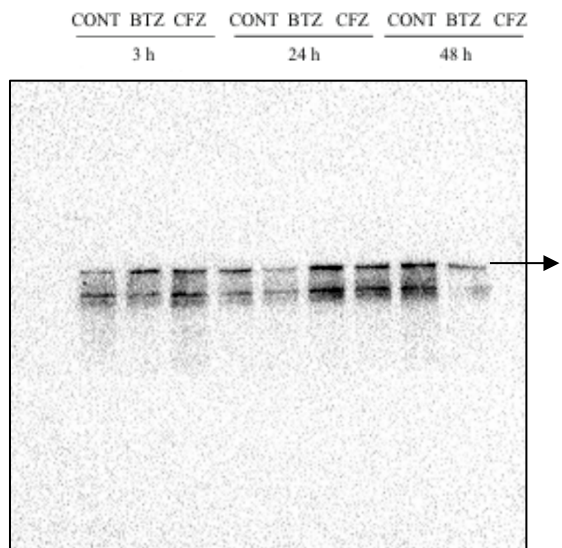

Uncropped blot for Coronin 1C (Figure S8D)

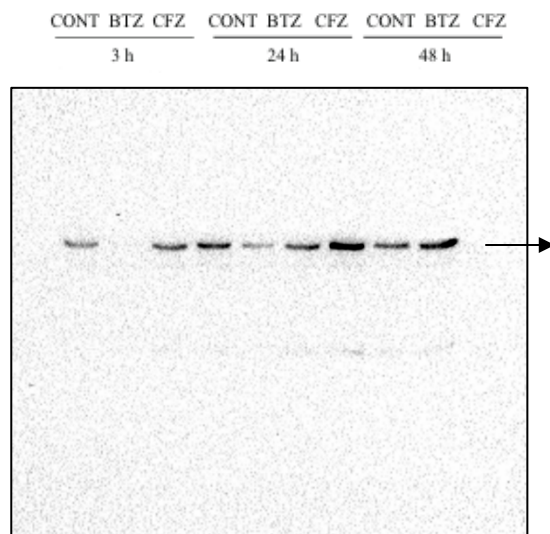

Uncropped blot for GRP78 (Figure S10C)

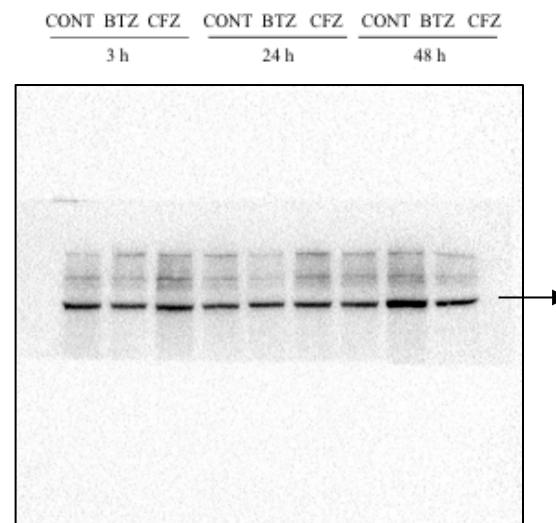

Uncropped blot for GAPDH (Figure S7C, S8C and S10C)

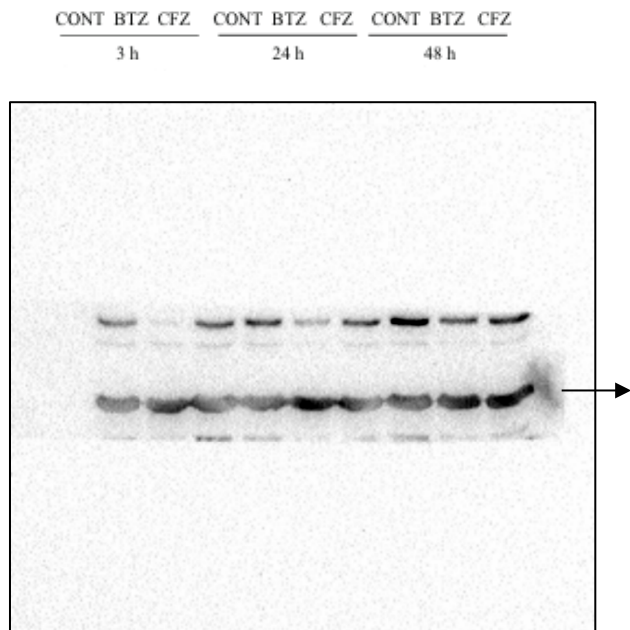

Membrane for Nestin, Coronin 1C, GRP78 and GAPDH (Figure S7C, S8D and S10C)

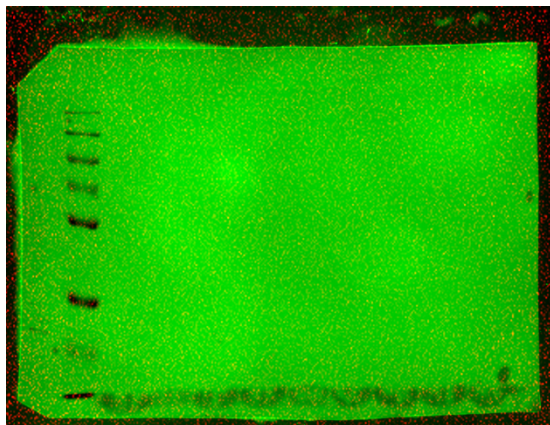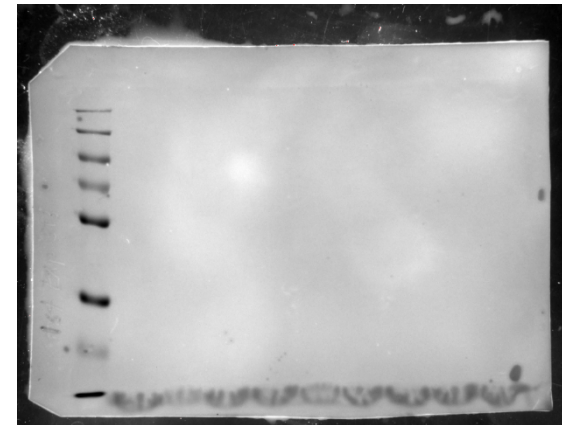

Uncropped blot for HSP47 (Figure S9D)

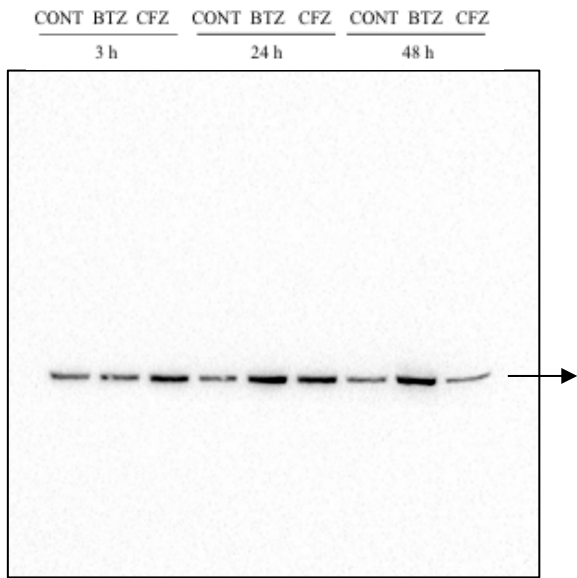

Uncropped blot for HSP70 (Figure S9E)

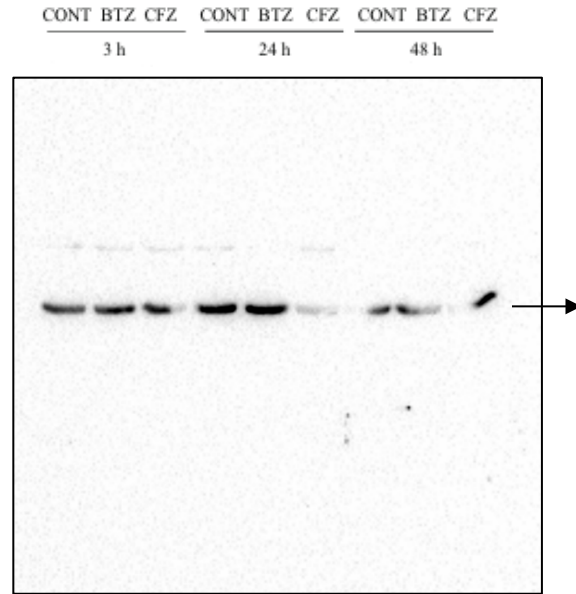

Uncropped blot for GRP94 (Figure S10D)

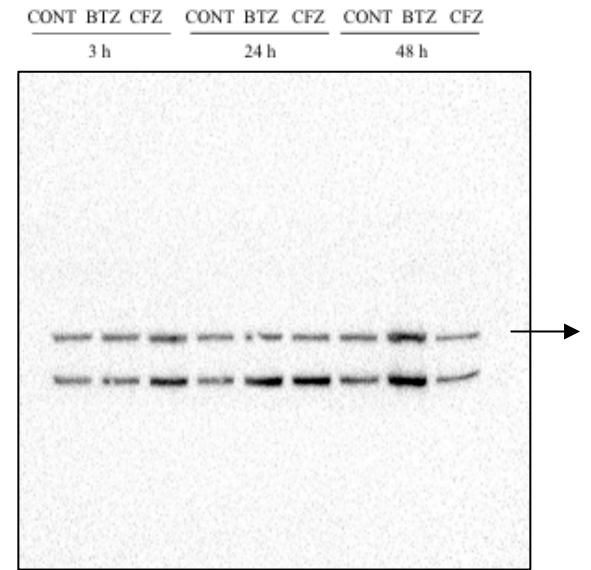

Uncropped blot for GAPDH (Figure S9D, S9E, S10C and S10D)

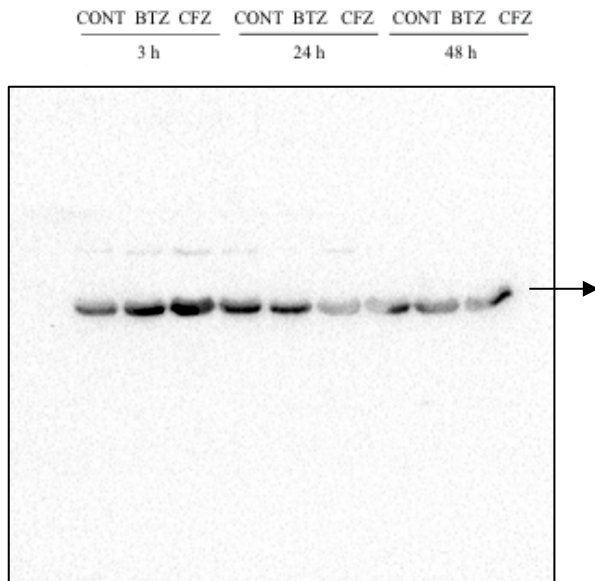

Membrane for HSp47, HSP70, GRP78, GRP94 and GAPDH (Figure S9D, S9E, S10C and S10D)

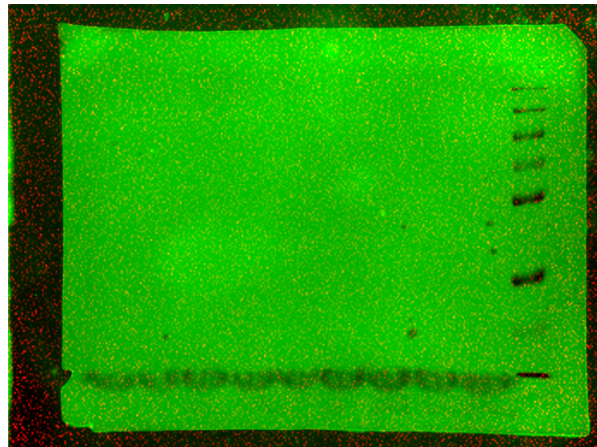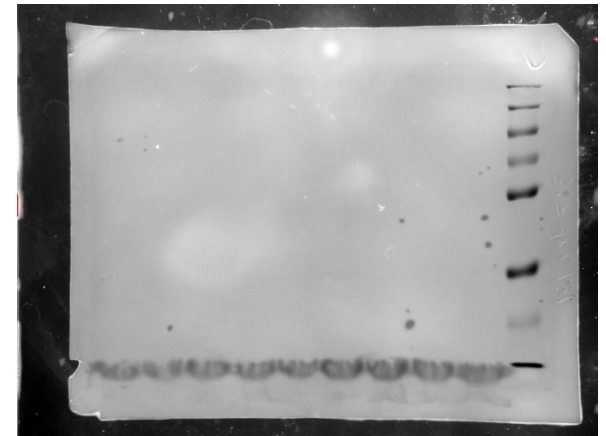

Uncropped blot for Vimentin (Figure S7D)

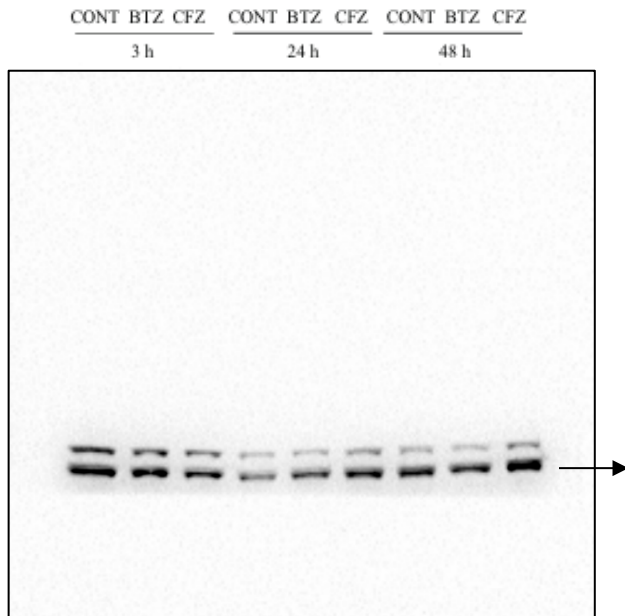

Uncropped blot for GAPDH (Figure S7D)

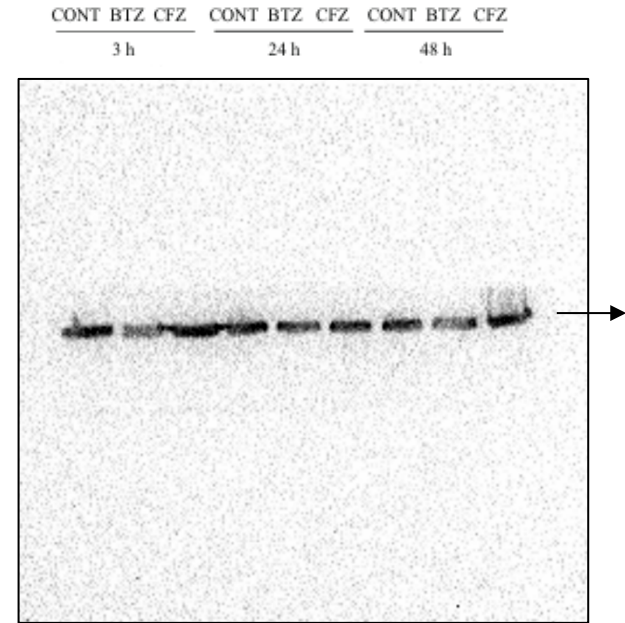

Membrane for Vimentin and GAPDH (Figure S7D)

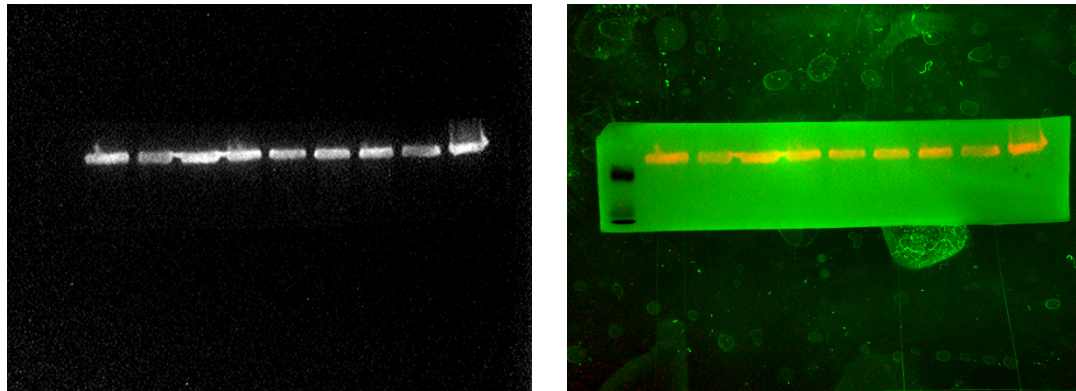

Uncropped blot for Protein Carbonylation (Figure S11A)

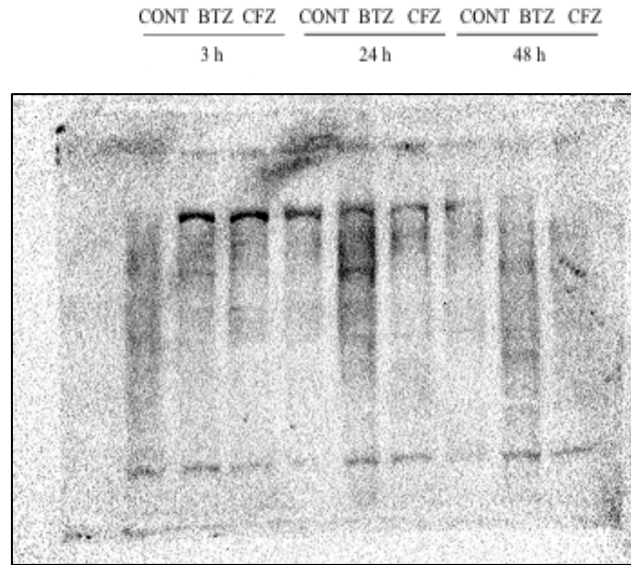

Membrane for Protein Carbonylation (Figure S11A)

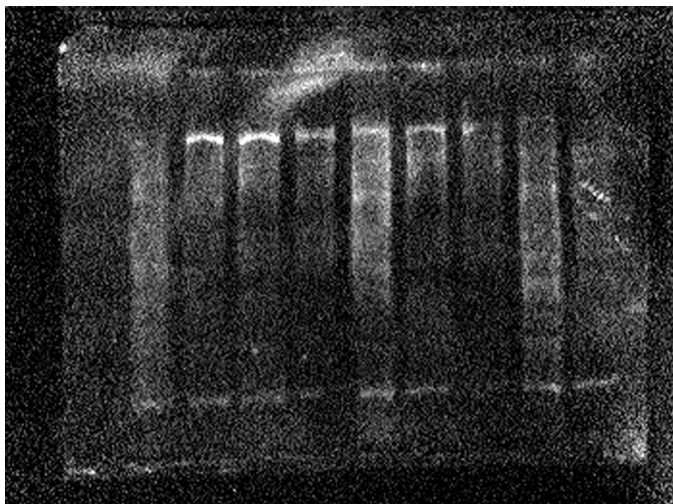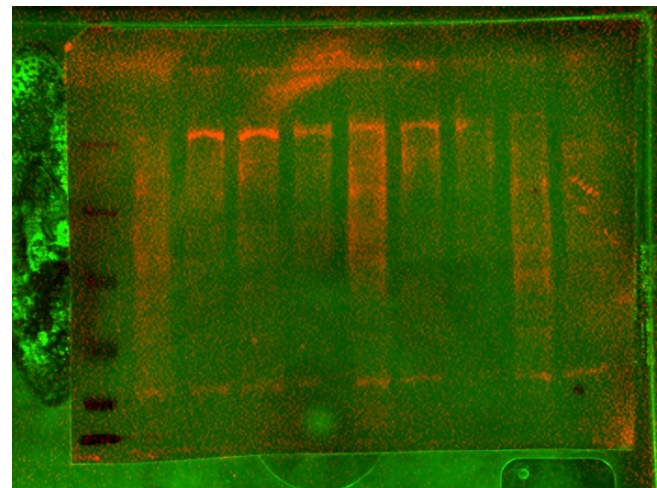

Uncropped blot for K48-linked ubiquitinated proteins (Figure S11B)

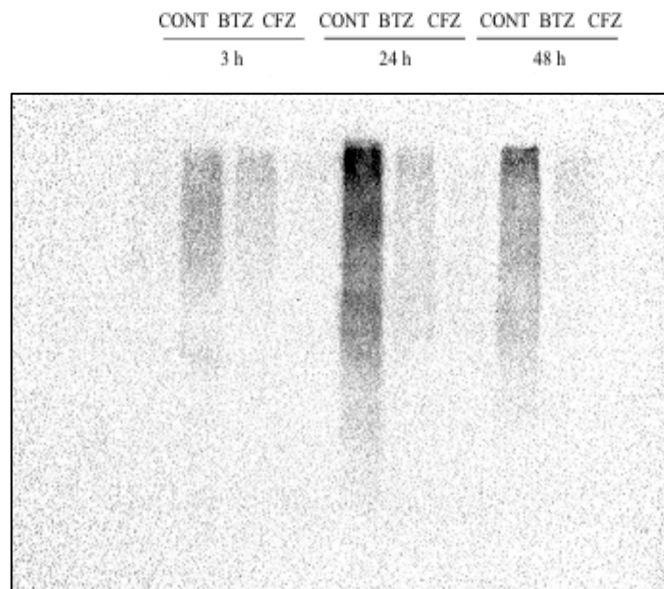

Membrane for K48-linked ubiquitinated proteins (Figure S11B)

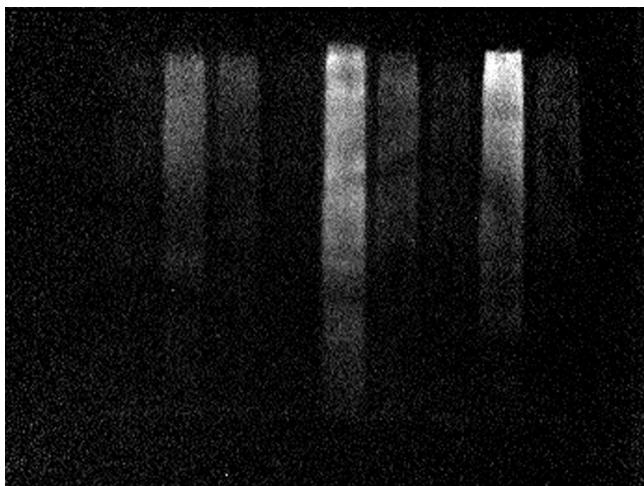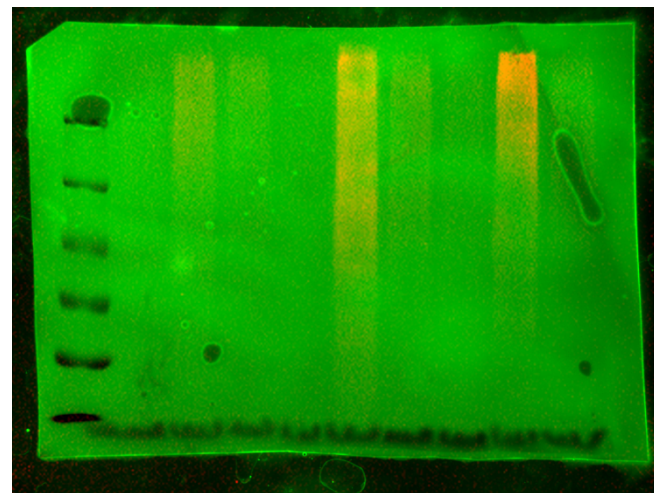

Supplement: 41598_2018_34507_MOESM1_ESM.pdf [file 41598_2018_34507_MOESM1_ESM.pdf]
